# Supplementary material for: Gene flow analysis method, the D-statistic, is robust in a wide parameter space
Source: Springer Nature journal article supplement (doi:10.1186/s12859-017-2002-4), 2018-01-08

A

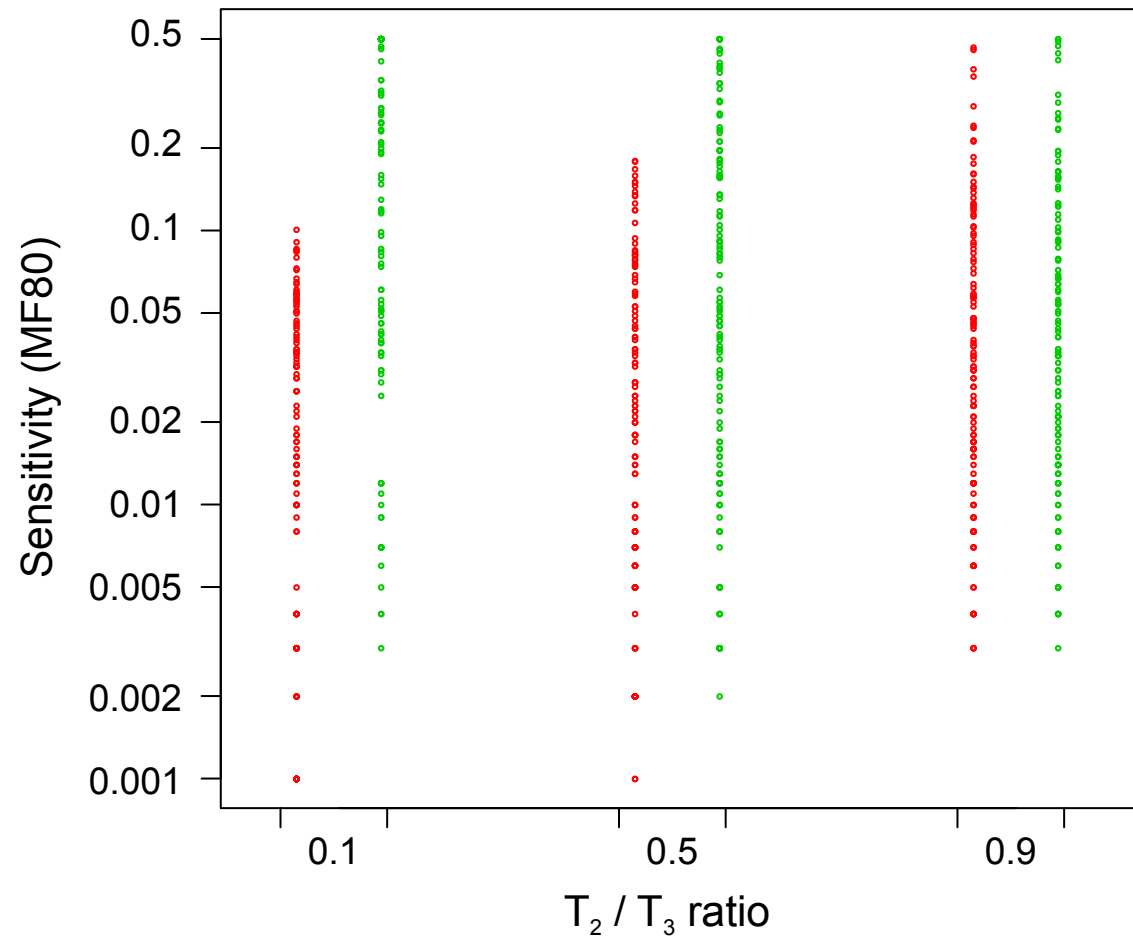

B

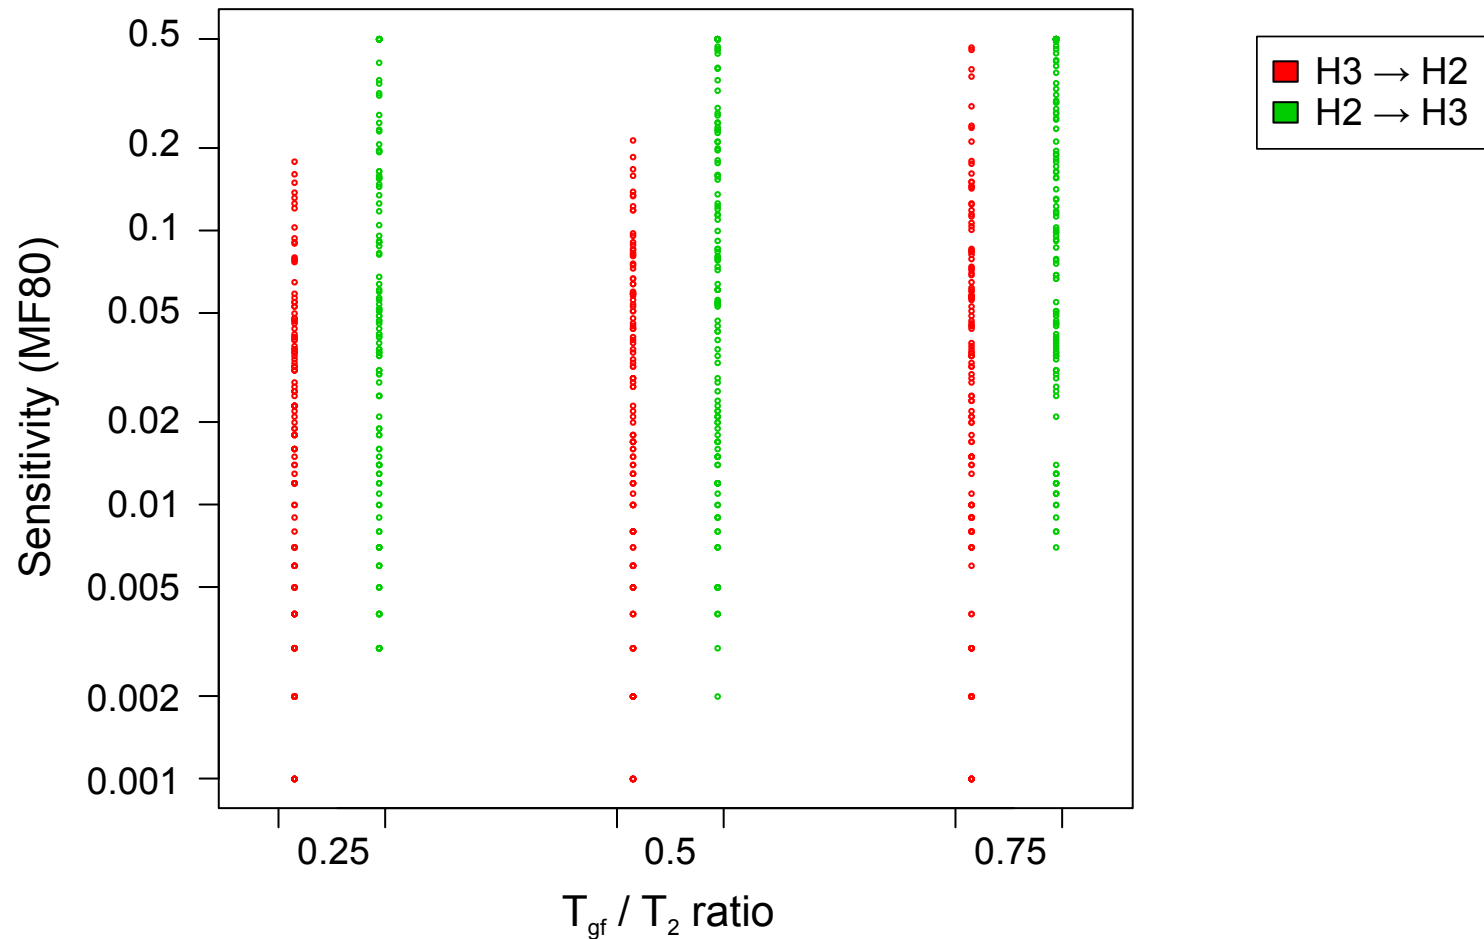

Supplement: MOESM1 [file 12859_2017_2002_MOESM1_ESM.pdf]
