# Supplementary material for: Gene flow analysis method, the D-statistic, is robust in a wide parameter space
Source: BMC Bioinformatics. 2018 Jan 8;19:10. doi: 10.1186/s12859-017-2002-4 (PMC5759368; doi:10.1186/s12859-017-2002-4)
Supplement: Supplementary file 2 — Detailed results from each dataset. Description: Input parameters, sensitivity, significance information and linear regression of the f-statistics, from all datasets in three simulation schemes. (XLSX 214 kb) [file 12859_2017_2002_MOESM2_ESM.xlsx]

## Sheet: Simulation Scheme 1
Input information							Significance and sensitivity				Regression model: fG = a + b × f; direction H3-> H2						Regression model: fHom = a + b × f; direction H3 -> H2						Regression model: fHom = a + b × f; direction H2 -> H3
T3 (1/μ Generations)	Ne (1/μ)	Ne/T3	Tgf/T2	T2/T3	Tgf/T3	Replicate	Z-score of d (f = 0)	Z-score of fHom (f = 0)	MF80 (H3 -> H2)	MF80 (H2 -> H3)	r2 of model	a	p-value for a	b	b predictor	p-value of b	r2 of model	a	p-value for a	b	b predictor	p-value of b	r2 of model	a	p-value for a	b	b predictor	p-value of b
0.001	0.0002	0.2	0.25	0.1	0.025	1	-0.132447	-0.113509	0.001	0.007	0.999991	-6.84291e-05	0.205252	0.975255	0.975	9.16871e-188	0.999991	-5.7038e-05	0.205252	0.812907	0.8125	9.16871e-188	0.98228	-0.0010491	1.62703e-05	0.0945205	0.0625	1.45611e-66
0.001	0.0005	0.5	0.25	0.1	0.025	1	0.163671	0.16085	0.004	0.052	0.999965	7.47008e-05	0.469425	0.974363	0.975	8.54657e-167	0.999965	4.98657e-05	0.469425	0.650426	0.65	8.54657e-167	0.977808	-0.000656789	0.000881632	0.0702121	0.05	6.01921e-63
0.001	0.001	1	0.25	0.1	0.025	1	-1.63972	-1.60881	0.019	0.248	0.99988	-0.00579562	2.24772e-43	0.97912	0.975	6.88096e-147	0.99988	-0.00290752	2.24772e-43	0.4912	0.4875	6.88096e-147	0.975347	-0.00307189	1.51558e-34	0.0484185	0.0375	2.95426e-61
0.001	0.002	2	0.25	0.1	0.025	1	-0.525682	-0.516607	0.04	0.501	0.999602	-0.00519959	3.13376e-24	0.965757	0.975	1.49842e-127	0.999602	-0.00172526	3.13376e-24	0.320446	0.325	1.49842e-127	0.950283	-0.00193243	6.90995e-26	0.0292946	0.025	5.58879e-50
0.001	0.005	5	0.25	0.1	0.025	1	0.325006	0.323714	0.091	0.501	0.99369	0.00829935	8.17912e-09	0.894056	0.975	3.71248e-83	0.99369	0.0014361	8.17912e-09	0.154705	0.1625	3.71248e-83	0.818378	0.00129118	1.0737e-10	0.0203655	0.0125	3.95714e-29
0.01	0.002	0.2	0.25	0.1	0.025	1	-0.0664671	-0.0644128	0.001	0.007	0.999993	2.7151e-05	0.542317	0.973429	0.975	9.33703e-194	0.999993	2.2518e-05	0.542317	0.807327	0.8125	9.33703e-194	0.982392	-0.00104247	1.939e-05	0.0952005	0.0625	1.15003e-66
0.01	0.005	0.5	0.25	0.1	0.025	1	0.537388	0.531151	0.003	0.042	0.999956	0.000599364	1.6859e-06	0.971092	0.975	5.20982e-163	0.999956	0.000396443	1.6859e-06	0.642319	0.65	5.20982e-163	0.989234	-0.000145198	0.264231	0.0690668	0.05	1.42777e-74
0.01	0.01	1	0.25	0.1	0.025	1	-1.71021	-1.68578	0.018	0.234	0.999882	-0.00578734	1.79715e-43	0.981563	0.975	4.04335e-147	0.999882	-0.00286179	1.79715e-43	0.485376	0.4875	4.04335e-147	0.968453	-0.00314179	2.6142e-30	0.0509083	0.0375	2.71812e-57
0.01	0.02	2	0.25	0.1	0.025	1	-0.60055	-0.591268	0.037	0.501	0.99939	-0.0048106	9.71446e-18	0.964037	0.975	1.03008e-120	0.99939	-0.00156686	9.71446e-18	0.313997	0.325	1.03008e-120	0.854228	-0.00192653	9.16118e-16	0.025513	0.025	1.13497e-32
0.01	0.05	5	0.25	0.1	0.025	1	0.26322	0.262699	0.08	0.501	0.996806	0.00498062	7.57942e-07	0.908792	0.975	4.23422e-94	0.996806	0.000842023	7.57942e-07	0.15364	0.1625	4.23422e-94	0.803654	0.00102882	4.08103e-10	0.0161291	0.0125	7.14147e-28
0.1	0.02	0.2	0.25	0.1	0.025	1	-0.0580664	-0.0578262	0.001	0.006	0.999994	7.40064e-06	0.865933	0.967047	0.975	4.92557e-194	0.999994	5.90137e-06	0.865933	0.771137	0.8125	4.92557e-194	0.986705	-0.00104623	8.04467e-06	0.104826	0.0625	3.50657e-71
0.1	0.05	0.5	0.25	0.1	0.025	1	0.607163	0.605427	0.003	0.028	0.999965	0.000337672	0.00156532	0.967675	0.975	1.52482e-166	0.999965	0.000208079	0.00156532	0.596299	0.65	1.52482e-166	0.99331	-0.000231069	0.0376931	0.0742757	0.05	3.22771e-82
0.1	0.1	1	0.25	0.1	0.025	1	-1.52385	-1.51738	0.012	0.148	0.999917	-0.00352537	1.86608e-34	0.973341	0.975	8.97468e-153	0.999917	-0.00158449	1.86608e-34	0.437472	0.4875	8.97468e-153	0.989388	-0.00173643	2.50737e-30	0.0490014	0.0375	8.36035e-75
0.1	0.2	2	0.25	0.1	0.025	1	-0.869838	-0.862484	0.026	0.355	0.999624	-0.00527884	4.2737e-25	0.9744	0.975	1.74797e-128	0.999624	-0.00153795	4.2737e-25	0.283884	0.325	1.74797e-128	0.973053	-0.00170951	3.65557e-30	0.0302063	0.025	7.95664e-60
0.1	0.5	5	0.25	0.1	0.025	1	0.105166	0.10507	0.05	0.501	0.998378	0.00155497	0.0215189	0.917064	0.975	5.45511e-105	0.998378	0.000231618	0.0215189	0.1366	0.1625	5.45511e-105	0.901606	0.000189611	0.0806856	0.0180934	0.0125	5.3392e-39
0.001	0.0002	0.2	0.5	0.1	0.05	1	2.32423	1.94385	0.001	0.004	0.999992	0.000245547	3.41396e-06	0.951448	0.95	6.74945e-190	0.999992	0.000204257	3.41396e-06	0.791457	0.791667	6.74945e-190	0.982007	-0.000445925	0.00408233	0.0620456	0.0416667	2.56374e-66
0.001	0.0005	0.5	0.5	0.1	0.05	1	0.203109	0.195694	0.004	0.084	0.999965	0.000192266	0.0575273	0.946126	0.95	7.9503e-167	0.999965	0.000128428	0.0575273	0.631986	0.633333	7.9503e-167	0.984425	-0.000333372	0.00378179	0.0494782	0.0333333	1.22866e-68
0.001	0.001	1	0.5	0.1	0.05	1	-0.89913	-0.881431	0.017	0.355	0.999852	-0.00314567	1.79618e-24	0.949427	0.95	1.81245e-143	0.999852	-0.00159322	1.79618e-24	0.480866	0.475	1.81245e-143	0.959458	-0.0020453	4.09411e-26	0.0341902	0.025	2.93119e-53
0.001	0.002	2	0.5	0.1	0.05	1	-0.695417	-0.686155	0.045	0.501	0.999091	-0.0079441	4.41787e-25	0.943297	0.95	2.69637e-114	0.999091	-0.00265212	4.41787e-25	0.314918	0.316667	2.69637e-114	0.831239	-0.00258989	1.43865e-33	0.0149172	0.0166667	2.59347e-30
0.001	0.005	5	0.5	0.1	0.05	1	0.686793	0.678031	0.086	0.501	0.991841	0.0211581	1.74716e-23	0.892075	0.95	5.00279e-79	0.991841	0.00359393	1.74716e-23	0.151529	0.158333	5.00279e-79	0.19278	0.00363416	1.05062e-30	0.00511787	0.00833333	7.25573e-05
0.01	0.002	0.2	0.5	0.1	0.05	1	0.995888	0.953009	0.001	0.009	0.999994	0.000124	0.0029916	0.949024	0.95	5.99088e-196	0.999994	0.000102737	0.0029916	0.786292	0.791667	5.99088e-196	0.985847	-0.000564214	7.09088e-05	0.0624374	0.0416667	3.55289e-70
0.01	0.005	0.5	0.5	0.1	0.05	1	0.009787	0.00949191	0.004	0.081	0.999965	3.37007e-05	0.737843	0.946476	0.95	1.25406e-166	0.999965	2.22825e-05	0.737843	0.6258	0.633333	1.25406e-166	0.979054	-0.000432323	0.00088621	0.0476228	0.0333333	7.09854e-64
0.01	0.01	1	0.5	0.1	0.05	1	-0.764531	-0.753606	0.015	0.325	0.999869	-0.00282925	2.16317e-23	0.94753	0.95	2.24835e-145	0.999869	-0.00141244	2.16317e-23	0.473032	0.475	2.24835e-145	0.958464	-0.00146919	4.81284e-18	0.0344168	0.025	7.18499e-53
0.01	0.02	2	0.5	0.1	0.05	1	-0.790486	-0.781549	0.041	0.501	0.999128	-0.00771199	5.29264e-25	0.937729	0.95	5.89752e-115	0.999128	-0.00252643	5.29264e-25	0.307198	0.316667	5.89752e-115	0.828813	-0.00254807	9.64445e-32	0.0155496	0.0166667	4.40416e-30
0.01	0.05	5	0.5	0.1	0.05	1	0.723492	0.717895	0.073	0.501	0.996883	0.0178355	4.70405e-31	0.907293	0.95	1.7235e-94	0.996883	0.002976	4.70405e-31	0.151389	0.158333	1.7235e-94	0.557567	0.00288414	2.02004e-28	0.0101692	0.00833333	9.65225e-15
0.1	0.02	0.2	0.5	0.1	0.05	1	0.49116	0.488991	0.001	0.009	0.999992	3.51772e-05	0.449688	0.93843	0.95	3.30148e-191	0.999992	2.80184e-05	0.449688	0.747452	0.791667	3.30148e-191	0.98501	-0.000631273	8.27052e-05	0.0685556	0.0416667	2.97833e-69
0.1	0.05	0.5	0.5	0.1	0.05	1	-0.311724	-0.308727	0.003	0.061	0.999979	-0.000241269	0.00233999	0.936423	0.95	5.62437e-175	0.999979	-0.000148707	0.00233999	0.577166	0.633333	5.62437e-175	0.990394	-0.000526855	8.45598e-08	0.0502409	0.0333333	2.09756e-76
0.1	0.1	1	0.5	0.1	0.05	1	-0.615725	-0.611963	0.01	0.211	0.999934	-0.00160889	1.04048e-18	0.938401	0.95	1.54869e-156	0.999934	-0.000729156	1.04048e-18	0.425286	0.475	1.54869e-156	0.979722	-0.000828352	1.5995e-14	0.0336931	0.025	2.13973e-64
0.1	0.2	2	0.5	0.1	0.05	1	-1.01414	-1.00832	0.029	0.501	0.999605	-0.00637739	2.74704e-30	0.939402	0.95	1.06161e-127	0.999605	-0.00186111	2.74704e-30	0.274144	0.316667	1.06161e-127	0.909252	-0.00173941	1.22653e-32	0.0147786	0.0166667	2.66618e-40
0.1	0.5	5	0.5	0.1	0.05	1	0.703853	0.703012	0.044	0.501	0.998849	0.0115833	4.6057e-33	0.90179	0.95	1.6948e-110	0.998849	0.00171366	4.6057e-33	0.133413	0.158333	1.6948e-110	0.731968	0.0016786	4.10034e-27	0.00916427	0.00833333	7.48964e-23
0.001	0.0002	0.2	0.75	0.1	0.075	1	-0.0682494	-0.0571908	0.001	0.036	0.999992	-8.38122e-06	0.859262	0.92479	0.925	3.55182e-190	0.999992	-6.98703e-06	0.859262	0.770953	0.770833	3.55182e-190	0.985183	-0.000318944	1.23225e-05	0.0309744	0.0208333	1.93558e-69
0.001	0.0005	0.5	0.75	0.1	0.075	1	1.74733	1.69702	0.002	0.096	0.999957	0.00175567	5.2486e-26	0.92479	0.925	2.36967e-163	0.999957	0.00116803	5.2486e-26	0.615255	0.616667	2.36967e-163	0.971398	0.000957434	6.56043e-18	0.0273879	0.0166667	7.21925e-59
0.001	0.001	1	0.75	0.1	0.075	1	-0.671361	-0.658415	0.017	0.501	0.999807	-0.00261959	6.11331e-18	0.923092	0.925	3.6827e-139	0.999807	-0.00132411	6.11331e-18	0.466591	0.4625	3.6827e-139	0.876382	-0.00149619	1.52082e-24	0.0145821	0.0125	2.51625e-35
0.001	0.002	2	0.75	0.1	0.075	1	0.252302	0.248464	0.035	0.501	0.998899	0.00301372	4.21166e-07	0.912687	0.925	3.30431e-111	0.998899	0.00100339	4.21166e-07	0.30387	0.308333	3.30431e-111	0.000364138	0.000839963	2.95109e-06	0.000176852	0.00833333	0.870035
0.001	0.005	5	0.75	0.1	0.075	1	0.123463	0.121299	0.101	0.501	0.996588	0.00323027	0.000.0002562	0.961929	0.925	4.87552e-93	0.996588	0.000542124	0.000.0002562	0.161437	0.154167	4.87552e-93	0.339898	0.000547625	0.000899106	0.0063398	0.00416667	3.27572e-08
0.01	0.002	0.2	0.75	0.1	0.075	1	-0.288352	-0.273831	0.001	0.035	0.999995	-9.62341e-05	0.0115442	0.922759	0.925	9.87215e-198	0.999995	-7.98359e-05	0.0115442	0.765522	0.770833	9.87215e-198	0.978377	-0.000434162	5.32766e-06	0.0332191	0.0208333	2.30484e-63
0.01	0.005	0.5	0.75	0.1	0.075	1	2.01944	1.97946	0.002	0.076	0.999958	0.0019897	9.83559e-30	0.922418	0.925	7.10886e-164	0.999958	0.00131269	9.83559e-30	0.608556	0.616667	7.10886e-164	0.97196	0.00108505	2.18471e-21	0.0267198	0.0166667	3.4663e-59
0.01	0.01	1	0.75	0.1	0.075	1	-0.654949	-0.644591	0.015	0.501	0.999836	-0.00263946	7.40821e-20	0.924068	0.925	7.57277e-142	0.999836	-0.00131708	7.40821e-20	0.461106	0.4625	7.57277e-142	0.930455	-0.0012379	3.02533e-25	0.016109	0.0125	1.39631e-44
0.01	0.02	2	0.75	0.1	0.075	1	0.215571	0.212621	0.032	0.501	0.99915	0.00210623	3.49451e-05	0.915135	0.925	2.21915e-115	0.99915	0.000687112	3.49451e-05	0.298544	0.308333	2.21915e-115	0.116067	0.000661265	2.17045e-06	0.00260291	0.00833333	0.00260005
0.01	0.05	5	0.75	0.1	0.075	1	0.21156	0.208947	0.084	0.501	0.997442	0.00543932	2.6304e-08	0.963162	0.925	1.14799e-97	0.997442	0.000899479	2.6304e-08	0.159274	0.154167	1.14799e-97	0.588372	0.00101548	3.49097e-10	0.00936076	0.00416667	6.51352e-16
0.1	0.02	0.2	0.75	0.1	0.075	1	0.27789	0.275045	0.001	0.025	0.999992	3.29609e-06	0.944805	0.907188	0.925	2.5257e-189	0.999992	2.62946e-06	0.944805	0.723711	0.770833	2.5257e-189	0.985207	-0.000311066	0.000126244	0.0350186	0.0208333	1.82555e-69
0.1	0.05	0.5	0.75	0.1	0.075	1	2.23156	2.21477	0.001	0.046	0.999979	0.00147258	4.67177e-31	0.908929	0.925	1.16652e-174	0.999979	0.000905887	4.67177e-31	0.559145	0.616667	1.16652e-174	0.975601	0.000784034	5.01301e-16	0.0267519	0.0166667	2.01319e-61
0.1	0.1	1	0.75	0.1	0.075	1	-0.568829	-0.564822	0.011	0.501	0.999894	-0.00150194	2.11866e-13	0.911965	0.925	7.07181e-149	0.999894	-0.00068118	2.11866e-13	0.413608	0.4625	7.07181e-149	0.905233	-0.000795405	1.68159e-13	0.0152531	0.0125	1.32817e-39
0.1	0.2	2	0.75	0.1	0.075	1	0.226838	0.224991	0.021	0.501	0.999689	0.00180592	1.6497e-08	0.902608	0.925	1.50867e-131	0.999689	0.000526777	1.6497e-08	0.263286	0.308333	1.50867e-131	0.402311	0.000356883	4.73588e-05	0.00378142	0.00833333	7.67416e-10
0.1	0.5	5	0.75	0.1	0.075	1	-0.0245242	-0.0243191	0.056	0.501	0.998882	-0.000330039	0.54986	0.916725	0.925	5.76195e-111	0.998882	-4.84935e-05	0.54986	0.134697	0.154167	5.76195e-111	0.819591	-0.000133432	0.093134	0.00933372	0.00416667	3.08577e-29
0.001	0.0002	0.2	0.25	0.5	0.125	1	0.614299	0.596365	0.001	0.003	0.999992	0.0002395	3.80668e-07	0.873415	0.875	2.63254e-191	0.999992	0.000199461	3.80668e-07	0.727399	0.729167	2.63254e-191	0.996408	-0.00196405	7.00117e-06	0.377578	0.3125	3.26537e-92
0.001	0.0005	0.5	0.25	0.5	0.125	1	0.812261	0.794887	0.005	0.01	0.999953	0.00122438	6.1479e-18	0.87345	0.875	8.04366e-162	0.999953	0.000817853	6.1479e-18	0.58344	0.583333	8.04366e-162	0.997488	-0.000479994	0.0664911	0.286701	0.25	5.82776e-98
0.001	0.001	1	0.25	0.5	0.125	1	-0.405529	-0.396644	0.02	0.047	0.999805	-0.00195567	1.89652e-13	0.870621	0.875	5.38776e-139	0.999805	-0.000981635	1.89652e-13	0.437002	0.4375	5.38776e-139	0.9981	-0.00163577	3.84053e-15	0.212025	0.1875	1.91676e-102
0.001	0.002	2	0.25	0.5	0.125	1	-0.12648	-0.126298	0.044	0.105	0.999176	-0.0015205	0.00108976	0.86927	0.875	7.26792e-116	0.999176	-0.000506042	0.00108976	0.289303	0.291667	7.26792e-116	0.995659	-0.000670508	7.74535e-05	0.135444	0.125	3.60582e-89
0.001	0.005	5	0.25	0.5	0.125	1	-1.99752	-1.96667	0.179	0.411	0.99567	-0.0588389	1.01897e-61	0.9071	0.875	3.28991e-89	0.99567	-0.00986585	1.01897e-61	0.152098	0.145833	3.28991e-89	0.974869	-0.00989264	6.89953e-59	0.0685694	0.0625	6.01049e-61
0.01	0.002	0.2	0.25	0.5	0.125	1	-0.481617	-0.475426	0.002	0.003	0.999994	-0.000142458	0.000239821	0.872096	0.875	3.87768e-196	0.999994	-0.000118005	0.000239821	0.722398	0.729167	3.87768e-196	0.996327	-0.00224177	6.61427e-07	0.378961	0.3125	7.45772e-92
0.01	0.005	0.5	0.25	0.5	0.125	1	0.232714	0.229411	0.005	0.012	0.999944	0.000438483	0.000334293	0.869803	0.875	4.29521e-159	0.999944	0.000289753	0.000334293	0.574773	0.583333	4.29521e-159	0.997822	-0.000946611	0.00016589	0.28502	0.25	2.99578e-100
0.01	0.01	1	0.25	0.5	0.125	1	-0.198752	-0.195153	0.018	0.041	0.999811	-0.000862698	0.000125894	0.866394	0.875	1.43874e-139	0.999811	-0.000427126	0.000125894	0.428956	0.4375	1.43874e-139	0.998913	-0.000962893	3.27452e-11	0.209284	0.1875	2.01596e-111
0.01	0.02	2	0.25	0.5	0.125	1	-0.212485	-0.212091	0.041	0.096	0.999427	-0.00252269	2.67841e-09	0.86916	0.875	1.05708e-121	0.999427	-0.000826575	2.67841e-09	0.284785	0.291667	1.05708e-121	0.99587	-0.00096489	1.6793e-08	0.13209	0.125	5.72106e-90
0.01	0.05	5	0.25	0.5	0.125	1	-1.87044	-1.84881	0.15	0.345	0.997157	-0.0480418	1.90065e-62	0.893798	0.875	5.6723e-96	0.997157	-0.00789159	1.90065e-62	0.14682	0.145833	5.6723e-96	0.980762	-0.00794605	1.43896e-57	0.0658666	0.0625	3.04881e-65
0.1	0.02	0.2	0.25	0.5	0.125	1	-0.482896	-0.481002	0.002	0.003	0.999995	-0.000125202	0.000255133	0.845942	0.875	3.71098e-199	0.999995	-9.97217e-05	0.000255133	0.673782	0.729167	3.71098e-199	0.997098	-0.00193307	1.031e-06	0.37547	0.3125	1.21539e-95
0.1	0.05	0.5	0.25	0.5	0.125	1	0.562898	0.561182	0.004	0.008	0.999963	0.000496542	8.46482e-07	0.848827	0.875	8.65685e-166	0.999963	0.000305731	8.46482e-07	0.52264	0.583333	8.65685e-166	0.998396	-0.000578866	0.00444693	0.274738	0.25	3.62926e-105
0.1	0.1	1	0.25	0.5	0.125	1	-0.50596	-0.502687	0.014	0.03	0.999841	-0.00147679	4.10858e-11	0.845278	0.875	2.61078e-142	0.999841	-0.000664781	4.10858e-11	0.380504	0.4375	2.61078e-142	0.999033	-0.00121045	3.75764e-17	0.198223	0.1875	2.67974e-113
0.1	0.2	2	0.25	0.5	0.125	1	-0.296688	-0.296434	0.028	0.061	0.999732	-0.00216829	5.11403e-13	0.845261	0.875	6.67429e-134	0.999732	-0.000639182	5.11403e-13	0.249171	0.291667	6.67429e-134	0.998659	-0.000766751	2.8331e-14	0.124144	0.125	4.85359e-108
0.1	0.5	5	0.25	0.5	0.125	1	-1.63752	-1.62786	0.09	0.197	0.998189	-0.0256658	1.82655e-50	0.880446	0.875	3.20423e-103	0.998189	-0.00372043	1.82655e-50	0.127627	0.145833	3.20423e-103	0.989113	-0.0038147	4.8415e-46	0.0614512	0.0625	2.1548e-74
0.001	0.0002	0.2	0.5	0.5	0.25	1	-0.412389	-0.402149	0.002	0.005	0.999987	-0.000116416	0.0200578	0.748594	0.75	3.99099e-182	0.999987	-9.69747e-05	0.0200578	0.62358	0.625	3.99099e-182	0.995856	-0.00154401	1.36011e-06	0.254115	0.208333	6.5061e-90
0.001	0.0005	0.5	0.5	0.5	0.25	1	0.46516	0.458462	0.007	0.02	0.999943	0.000765323	9.06818e-11	0.751738	0.75	6.75066e-159	0.999943	0.000510729	9.06818e-11	0.501663	0.5	6.75066e-159	0.997052	-0.000297116	0.115181	0.191361	0.166667	2.18186e-95
0.001	0.001	1	0.5	0.5	0.25	1	0.970233	0.961254	0.014	0.045	0.999744	0.00439766	3.04284e-32	0.748718	0.75	1.1333e-134	0.999744	0.00220742	3.04284e-32	0.375821	0.375	1.1333e-134	0.996149	0.00169443	2.78926e-17	0.137963	0.125	4.28546e-91
0.001	0.002	2	0.5	0.5	0.25	1	-2.06204	-2.04222	0.081	0.228	0.999102	-0.0237112	4.82406e-63	0.770983	0.75	1.70906e-114	0.999102	-0.00781239	4.82406e-63	0.254024	0.25	1.70906e-114	0.99479	-0.00826114	9.99388e-67	0.0989899	0.0833333	3.08597e-86
0.001	0.005	5	0.5	0.5	0.25	1	-0.521119	-0.512996	0.168	0.501	0.990996	-0.018072	3.99584e-23	0.736038	0.75	1.91335e-77	0.990996	-0.00297619	3.99584e-23	0.121214	0.125	1.91335e-77	0.953941	-0.00285965	8.29162e-30	0.0387812	0.0416667	3.30062e-51
0.01	0.002	0.2	0.5	0.5	0.25	1	-0.814806	-0.806315	0.002	0.005	0.999993	-0.000212253	5.96925e-08	0.744756	0.75	1.42603e-192	0.999993	-0.000175834	5.96925e-08	0.616967	0.625	1.42603e-192	0.996274	-0.00159204	2.04425e-07	0.253664	0.208333	1.26494e-91
0.01	0.005	0.5	0.5	0.5	0.25	1	0.701327	0.692454	0.006	0.017	0.999937	0.0011685	2.8784e-17	0.743438	0.75	4.37491e-157	0.999937	0.000773359	2.8784e-17	0.492037	0.5	4.37491e-157	0.996444	-0.000154278	0.451667	0.190546	0.166667	2.24988e-92
0.01	0.01	1	0.5	0.5	0.25	1	0.980219	0.97338	0.013	0.04	0.99966	0.00423593	8.64915e-28	0.739171	0.75	4.26314e-130	0.99966	0.00209673	8.64915e-28	0.365881	0.375	4.26314e-130	0.995344	0.00165536	3.04946e-15	0.136149	0.125	4.81591e-88
0.01	0.02	2	0.5	0.5	0.25	1	-2.17947	-2.16276	0.076	0.212	0.998614	-0.0225562	2.6306e-55	0.756047	0.75	1.61469e-107	0.998614	-0.00732473	2.6306e-55	0.245514	0.25	1.61469e-107	0.993112	-0.00762893	2.20409e-60	0.0971808	0.0833333	9.50163e-82
0.01	0.05	5	0.5	0.5	0.25	1	-0.4309	-0.426083	0.139	0.456	0.996378	-0.0105373	3.88368e-22	0.707593	0.75	4.44023e-92	0.996378	-0.00170214	3.88368e-22	0.114301	0.125	4.44023e-92	0.965759	-0.00172994	4.21466e-22	0.0372538	0.0416667	5.64086e-56
0.1	0.02	0.2	0.5	0.5	0.25	1	-0.423515	-0.422627	0.002	0.004	0.999985	-7.41316e-05	0.133731	0.702547	0.75	3.82195e-180	0.999985	-5.90482e-05	0.133731	0.559601	0.625	3.82195e-180	0.997291	-0.00123664	6.93731e-07	0.244062	0.208333	9.58163e-97
0.1	0.05	0.5	0.5	0.5	0.25	1	0.788266	0.784765	0.005	0.012	0.999965	0.000957385	1.59577e-20	0.703665	0.75	1.19543e-166	0.999965	0.00059058	1.59577e-20	0.434068	0.5	1.19543e-166	0.997359	-7.95978e-05	0.628695	0.177825	0.166667	3.74515e-97
0.1	0.1	1	0.5	0.5	0.25	1	0.890454	0.886007	0.01	0.029	0.999839	0.00247229	1.34694e-24	0.710824	0.75	4.51137e-142	0.999839	0.00111257	1.34694e-24	0.319882	0.375	4.51137e-142	0.998201	0.000881861	6.63351e-14	0.125883	0.125	2.53866e-103
0.1	0.2	2	0.5	0.5	0.25	1	-2.19224	-2.18697	0.051	0.136	0.99936	-0.01471	1.53299e-55	0.720409	0.75	6.17115e-120	0.99936	-0.00429005	1.53299e-55	0.210101	0.25	6.17115e-120	0.994986	-0.00452239	1.09629e-52	0.0865791	0.0833333	7.48438e-87
0.1	0.5	5	0.5	0.5	0.25	1	-0.475571	-0.473752	0.085	0.264	0.997913	-0.00715634	1.06031e-19	0.705921	0.75	6.12174e-101	0.997913	-0.00102883	1.06031e-19	0.101487	0.125	6.12174e-101	0.970124	-0.00114174	1.30581e-15	0.0358835	0.0416667	3.6223e-58
0.001	0.0002	0.2	0.75	0.5	0.375	1	-1.3255	-1.26123	0.003	0.013	0.999979	-0.000468443	9.15493e-14	0.623115	0.625	9.14661e-175	0.999979	-0.000390447	9.15493e-14	0.519365	0.520833	9.14661e-175	0.996644	-0.00105601	1.88707e-11	0.12837	0.104167	2.65649e-93
0.001	0.0005	0.5	0.75	0.5	0.375	1	-0.304586	-0.298597	0.009	0.047	0.999914	-0.000379256	0.000440615	0.620637	0.625	3.40403e-152	0.999914	-0.000253724	0.000440615	0.41521	0.416667	3.40403e-152	0.994027	-0.000834119	5.44707e-08	0.099283	0.0833333	4.84987e-84
0.001	0.001	1	0.75	0.5	0.375	1	0.239196	0.234826	0.024	0.131	0.999679	0.00122523	4.39023e-08	0.625248	0.625	5.2391e-131	0.999679	0.000611503	4.39023e-08	0.312057	0.3125	5.2391e-131	0.990634	0.000342011	0.00534051	0.0684068	0.0625	8.23202e-77
0.001	0.002	2	0.75	0.5	0.375	1	-1.04888	-1.04103	0.079	0.4	0.998039	-0.0118201	2.70635e-36	0.628122	0.625	6.12363e-102	0.998039	-0.00389963	2.70635e-36	0.207227	0.208333	6.12363e-102	0.967504	-0.00399005	2.15164e-40	0.0444944	0.0416667	8.14216e-57
0.001	0.005	5	0.75	0.5	0.375	1	0.394584	0.388586	0.151	0.501	0.992415	0.0123942	7.87839e-21	0.607733	0.625	3.35579e-80	0.992415	0.00213955	7.87839e-21	0.10491	0.104167	3.35579e-80	0.91805	0.00197769	3.33108e-24	0.0245701	0.0208333	6.09806e-42
0.01	0.002	0.2	0.75	0.5	0.375	1	-0.918967	-0.908496	0.003	0.011	0.999982	-0.000300015	1.35652e-08	0.617017	0.625	3.06201e-177	0.999982	-0.000248866	1.35652e-08	0.511823	0.520833	3.06201e-177	0.996149	-0.000940056	4.4903e-09	0.127038	0.104167	4.2791e-91
0.01	0.005	0.5	0.75	0.5	0.375	1	-0.170996	-0.168916	0.008	0.042	0.999919	-0.000312319	0.00236027	0.615186	0.625	3.76642e-153	0.999919	-0.000206965	0.00236027	0.407666	0.416667	3.76642e-153	0.996012	-0.000531159	8.51675e-06	0.0979257	0.0833333	1.57335e-90
0.01	0.01	1	0.75	0.5	0.375	1	0.304665	0.301212	0.022	0.118	0.99977	0.00128735	4.73532e-11	0.61544	0.625	2.17727e-136	0.99977	0.000634863	4.73532e-11	0.303507	0.3125	2.17727e-136	0.993306	0.00061603	1.67619e-08	0.0661525	0.0625	3.29311e-82
0.01	0.02	2	0.75	0.5	0.375	1	-0.882353	-0.879151	0.069	0.346	0.998778	-0.00880618	2.27663e-35	0.612669	0.625	1.54376e-109	0.998778	-0.00286397	2.27663e-35	0.199254	0.208333	1.54376e-109	0.975229	-0.00310793	1.86194e-35	0.0473109	0.0416667	3.52321e-61
0.01	0.05	5	0.75	0.5	0.375	1	0.444601	0.440564	0.126	0.501	0.992552	0.011154	3.37137e-18	0.623248	0.625	1.71122e-80	0.992552	0.00187753	3.37137e-18	0.10491	0.104167	1.71122e-80	0.897353	0.00211136	6.40189e-26	0.0216176	0.0208333	2.56153e-38
0.1	0.02	0.2	0.75	0.5	0.375	1	-0.0187531	-0.0187148	0.002	0.007	0.999981	-4.2295e-05	0.342769	0.566619	0.625	2.08376e-176	0.999981	-3.37414e-05	0.342769	0.452028	0.520833	2.08376e-176	0.997391	-0.000518476	8.63141e-06	0.118355	0.104167	2.37848e-97
0.1	0.05	0.5	0.75	0.5	0.375	1	-0.13103	-0.130689	0.007	0.031	0.999913	-0.000174041	0.0701439	0.56799	0.625	4.61425e-152	0.999913	-0.000107442	0.0701439	0.350642	0.416667	4.61425e-152	0.995473	-0.000463395	5.27202e-05	0.0893637	0.0833333	1.69946e-88
0.1	0.1	1	0.75	0.5	0.375	1	0.470883	0.468853	0.015	0.078	0.999843	0.00144821	9.2728e-18	0.572132	0.625	1.49759e-142	0.999843	0.000650465	9.2728e-18	0.256974	0.3125	1.49759e-142	0.993858	0.000521453	6.40394e-08	0.0616003	0.0625	1.36047e-83
0.1	0.2	2	0.75	0.5	0.375	1	-0.614192	-0.61368	0.045	0.212	0.999189	-0.00368404	1.73212e-20	0.562895	0.625	3.95857e-116	0.999189	-0.00107875	1.73212e-20	0.164825	0.208333	3.95857e-116	0.991975	-0.00126403	4.88636e-30	0.0415198	0.0416667	2.7015e-79
0.1	0.5	5	0.75	0.5	0.375	1	0.314214	0.31381	0.084	0.378	0.996965	0.00557017	1.01819e-14	0.584418	0.625	6.36176e-95	0.996965	0.000826749	1.01819e-14	0.0867419	0.104167	6.36176e-95	0.945349	0.000711231	8.40955e-12	0.0203896	0.0208333	1.85658e-48
0.001	0.0002	0.2	0.25	0.9	0.225	1	-1.0448	-1.04804	0.005	0.006	0.999987	-0.000929416	7.7636e-30	0.776564	0.775	6.26526e-183	0.999987	-0.000774649	7.7636e-30	0.64725	0.645833	6.26526e-183	0.999875	-0.00128822	2.6193e-17	0.581598	0.5625	3.97583e-146
0.001	0.0005	0.5	0.25	0.9	0.225	1	0.932368	0.927088	0.008	0.009	0.999943	0.00250656	1.12888e-36	0.772377	0.775	7.99048e-159	0.999943	0.00166624	1.12888e-36	0.513439	0.516667	7.99048e-159	0.999807	0.00113827	2.66979e-15	0.459236	0.45	3.50217e-139
0.001	0.001	1	0.25	0.9	0.225	1	0.630043	0.628438	0.019	0.021	0.999611	0.00319646	1.54789e-18	0.77135	0.775	6.46097e-128	0.999611	0.00158751	1.54789e-18	0.383088	0.3875	6.46097e-128	0.999564	0.00165747	1.2184e-20	0.342983	0.3375	4.32731e-126
0.001	0.002	2	0.25	0.9	0.225	1	0.988259	0.993133	0.036	0.041	0.999177	0.0124049	2.10899e-45	0.746175	0.775	6.84781e-116	0.999177	0.00416959	2.10899e-45	0.250807	0.258333	6.84781e-116	0.99872	0.00382134	3.69309e-39	0.227579	0.225	8.57713e-109
0.001	0.005	5	0.25	0.9	0.225	1	-0.335203	-0.33176	0.138	0.165	0.991854	-0.00984351	5.6059e-10	0.850363	0.775	4.71156e-79	0.991854	-0.00154521	5.6059e-10	0.133488	0.129167	4.71156e-79	0.99578	-0.00181585	9.77046e-22	0.11491	0.1125	1.26446e-89
0.01	0.002	0.2	0.25	0.9	0.225	1	-1.03591	-1.03787	0.005	0.005	0.99999	-0.000779472	5.01725e-29	0.770752	0.775	2.33091e-187	0.99999	-0.000646341	5.01725e-29	0.639111	0.645833	2.33091e-187	0.999892	-0.00119337	1.6398e-17	0.575511	0.5625	1.43473e-148
0.01	0.005	0.5	0.25	0.9	0.225	1	0.965567	0.961419	0.007	0.008	0.999958	0.00242676	3.38932e-40	0.767295	0.775	1.43806e-163	0.999958	0.00159925	3.38932e-40	0.505652	0.516667	1.43806e-163	0.999761	0.00109388	6.43917e-13	0.454661	0.45	9.10751e-136
0.01	0.01	1	0.25	0.9	0.225	1	0.854454	0.854413	0.016	0.018	0.999771	0.00424567	2.8143e-32	0.762752	0.775	1.93988e-136	0.999771	0.00208183	2.8143e-32	0.374009	0.3875	1.93988e-136	0.999597	0.0018895	3.64062e-25	0.336043	0.3375	2.22264e-127
0.01	0.02	2	0.25	0.9	0.225	1	1.0967	1.10407	0.031	0.035	0.999193	0.0122615	2.29483e-45	0.745707	0.775	3.32324e-116	0.999193	0.00405296	2.29483e-45	0.246488	0.258333	3.32324e-116	0.998604	0.00376553	1.25362e-38	0.218678	0.225	2.13357e-107
0.01	0.05	5	0.25	0.9	0.225	1	-0.472426	-0.468567	0.121	0.145	0.993996	-0.0115359	2.59132e-15	0.831792	0.775	5.86984e-84	0.993996	-0.00178166	2.59132e-15	0.128466	0.129167	5.86984e-84	0.993434	-0.00199001	5.85136e-20	0.109123	0.1125	1.60951e-82
0.1	0.02	0.2	0.25	0.9	0.225	1	-0.68009	-0.680263	0.004	0.004	0.99999	-0.000368639	1.59855e-13	0.731264	0.775	3.73546e-187	0.99999	-0.000293968	1.59855e-13	0.58314	0.645833	3.73546e-187	0.999902	-0.00080577	1.20906e-12	0.531836	0.5625	4.34906e-150
0.1	0.05	0.5	0.25	0.9	0.225	1	1.03646	1.03484	0.006	0.006	0.99995	0.00178339	1.41146e-30	0.733132	0.775	5.02504e-161	0.99995	0.00109516	1.41146e-30	0.450209	0.516667	5.02504e-161	0.99987	0.000872782	2.5971e-16	0.406345	0.45	1.69736e-145
0.1	0.1	1	0.25	0.9	0.225	1	0.684729	0.685159	0.012	0.014	0.999901	0.00258648	2.99869e-31	0.732566	0.775	7.44966e-150	0.999901	0.00115347	2.99869e-31	0.326694	0.3875	7.44966e-150	0.999804	0.000837273	1.05271e-17	0.29685	0.3375	5.48093e-139
0.1	0.2	2	0.25	0.9	0.225	1	0.945356	0.949306	0.023	0.025	0.999587	0.00684084	4.63551e-39	0.719845	0.775	5.78744e-127	0.999587	0.00201657	4.63551e-39	0.212199	0.258333	5.78744e-127	0.999029	0.00185041	1.76618e-27	0.193302	0.225	3.12526e-113
0.1	0.5	5	0.25	0.9	0.225	1	-0.491156	-0.488818	0.077	0.091	0.998064	-0.00774868	1.23984e-19	0.79607	0.775	3.82596e-102	0.998064	-0.00107885	1.23984e-19	0.110837	0.129167	3.82596e-102	0.997098	-0.00121918	1.05378e-20	0.0974215	0.1125	1.22033e-95
0.001	0.0002	0.2	0.5	0.9	0.45	1	0.689244	0.681353	0.004	0.005	0.999973	0.000568014	1.10044e-17	0.547676	0.55	4.16175e-171	0.999973	0.000473411	1.10044e-17	0.45646	0.458333	4.16175e-171	0.999896	0.000175752	0.0150165	0.386677	0.375	3.71194e-149
0.001	0.0005	0.5	0.5	0.9	0.45	1	-0.494406	-0.493379	0.018	0.023	0.999887	-0.00133685	2.35588e-20	0.549512	0.55	9.93071e-148	0.999887	-0.000890873	2.35588e-20	0.366193	0.366667	9.93071e-148	0.999751	-0.00102219	1.22261e-18	0.306789	0.3	4.43204e-135
0.001	0.001	1	0.5	0.9	0.45	1	1.57104	1.56127	0.017	0.021	0.999059	0.00905015	7.56187e-44	0.536207	0.55	9.74239e-114	0.999059	0.00449097	7.56187e-44	0.266083	0.275	9.74239e-114	0.999199	0.00443999	9.28949e-51	0.226944	0.225	2.49811e-116
0.001	0.002	2	0.5	0.9	0.45	1	1.13697	1.12859	0.044	0.054	0.997727	0.0133338	6.10081e-42	0.541704	0.55	1.43907e-99	0.997727	0.00440068	6.10081e-42	0.178784	0.183333	1.43907e-99	0.996944	0.00404309	3.72491e-39	0.155725	0.15	8.22553e-95
0.001	0.005	5	0.5	0.9	0.45	1	1.20865	1.19715	0.119	0.158	0.987372	0.0360304	4.07853e-46	0.537106	0.55	5.22669e-72	0.987372	0.00600913	4.07853e-46	0.0895783	0.0916667	5.22669e-72	0.974295	0.00558844	4.43755e-38	0.076144	0.075	1.38651e-60
0.01	0.002	0.2	0.5	0.9	0.45	1	-0.4239	-0.422837	0.006	0.007	0.999983	-0.000367833	7.61106e-14	0.542231	0.55	3.23588e-178	0.999983	-0.000305124	7.61106e-14	0.44979	0.458333	3.23588e-178	0.999837	-0.000716514	5.5496e-12	0.382275	0.375	6.59437e-142
0.01	0.005	0.5	0.5	0.9	0.45	1	-0.41777	-0.41641	0.017	0.021	0.999911	-0.00107488	1.70548e-18	0.543285	0.55	1.31581e-151	0.999911	-0.000710224	1.70548e-18	0.358973	0.366667	1.31581e-151	0.999759	-0.000881914	2.34748e-16	0.301344	0.3	1.25162e-135
0.01	0.01	1	0.5	0.9	0.45	1	1.61178	1.60358	0.016	0.019	0.999451	0.00845022	4.71479e-50	0.533732	0.55	2.19058e-122	0.999451	0.00413193	4.71479e-50	0.260981	0.275	2.19058e-122	0.99923	0.00396515	1.45438e-48	0.222102	0.225	5.84266e-117
0.01	0.02	2	0.5	0.9	0.45	1	1.25097	1.2473	0.039	0.047	0.997696	0.0136941	8.14501e-43	0.536433	0.55	2.39568e-99	0.997696	0.00443674	8.14501e-43	0.173798	0.183333	2.39568e-99	0.997296	0.00419346	1.94313e-43	0.14846	0.15	8.95397e-97
0.01	0.05	5	0.5	0.9	0.45	1	1.3419	1.33697	0.096	0.126	0.992455	0.0355736	4.89908e-55	0.513885	0.55	2.75651e-80	0.992455	0.00579606	4.89908e-55	0.083728	0.0916667	2.75651e-80	0.986001	0.00575896	4.68785e-52	0.0670468	0.075	2.36605e-70
0.1	0.02	0.2	0.5	0.9	0.45	1	0.0721541	0.0720594	0.004	0.005	0.999988	7.87315e-05	0.0130614	0.489328	0.55	3.266e-183	0.999988	6.28031e-05	0.0130614	0.390331	0.458333	3.266e-183	0.99992	-0.00022724	6.44797e-05	0.334012	0.375	2.821e-153
0.1	0.05	0.5	0.5	0.9	0.45	1	-0.387069	-0.386284	0.014	0.017	0.999897	-0.00079614	3.17157e-13	0.494793	0.55	2.73249e-149	0.999897	-0.000490498	3.17157e-13	0.30484	0.366667	2.73249e-149	0.999749	-0.000673226	6.97115e-14	0.257944	0.3	5.47115e-135
0.1	0.1	1	0.5	0.9	0.45	1	1.5176	1.51439	0.012	0.015	0.999681	0.00559512	2.41523e-48	0.490529	0.55	4.06394e-131	0.999681	0.00249318	2.41523e-48	0.218579	0.275	4.06394e-131	0.999654	0.00236762	2.28972e-50	0.186583	0.225	7.98729e-130
0.1	0.2	2	0.5	0.9	0.45	1	1.05398	1.05372	0.029	0.035	0.998743	0.00729268	1.86781e-35	0.498691	0.55	4.41276e-109	0.998743	0.00212111	1.86781e-35	0.145047	0.183333	4.41276e-109	0.998991	0.00199444	1.88187e-40	0.128009	0.15	1.28196e-112
0.1	0.5	5	0.5	0.9	0.45	1	1.37108	1.37145	0.059	0.078	0.994249	0.0222568	2.30934e-45	0.505873	0.55	1.19342e-84	0.994249	0.00322403	2.30934e-45	0.0732787	0.0916667	1.19342e-84	0.994123	0.00308331	7.0934e-51	0.0578101	0.075	2.65915e-84
0.001	0.0002	0.2	0.75	0.9	0.675	1	0.249124	0.250102	0.009	0.013	0.999924	0.000227467	2.6397e-05	0.325746	0.325	2.984e-154	0.999924	0.000189344	2.6397e-05	0.271153	0.270833	2.984e-154	0.999735	-3.21798e-05	0.572937	0.194985	0.1875	4.03966e-134
0.001	0.0005	0.5	0.75	0.9	0.675	1	-0.0951592	-0.095115	0.025	0.037	0.999707	-0.000215291	0.0345273	0.325944	0.325	1.75475e-132	0.999707	-0.000143358	0.0345273	0.21704	0.216667	1.75475e-132	0.999186	-0.000312305	0.000145529	0.152444	0.15	4.63608e-116
0.001	0.001	1	0.75	0.9	0.675	1	-1.11598	-1.09304	0.073	0.103	0.99887	-0.00594467	1.96989e-43	0.325845	0.325	8.60706e-111	0.99887	-0.00298703	1.96989e-43	0.163728	0.1625	8.60706e-111	0.997054	-0.00321886	9.94527e-41	0.119638	0.1125	2.13862e-95
0.001	0.002	2	0.75	0.9	0.675	1	0.324209	0.321384	0.125	0.179	0.995811	0.00410037	4.1172e-17	0.322758	0.325	9.63662e-90	0.995811	0.00134134	4.1172e-17	0.105582	0.108333	9.63662e-90	0.988385	0.00133388	3.44294e-13	0.0777696	0.075	2.36852e-73
0.001	0.005	5	0.75	0.9	0.675	1	-0.727025	-0.723321	0.458	0.473	0.96318	-0.023518	2.23447e-34	0.303244	0.325	8.29221e-55	0.96318	-0.00379845	2.23447e-34	0.0489778	0.0541667	8.29221e-55	0.935895	-0.00365867	1.37255e-28	0.0436265	0.0375	6.83619e-46
0.01	0.002	0.2	0.75	0.9	0.675	1	0.386836	0.387198	0.008	0.012	0.999941	0.000299988	2.0753e-09	0.318704	0.325	3.63154e-158	0.999941	0.000248474	2.0753e-09	0.263977	0.270833	3.63154e-158	0.999638	0.000104856	0.108615	0.189309	0.1875	4.51759e-129
0.01	0.005	0.5	0.75	0.9	0.675	1	-0.111324	-0.111297	0.024	0.035	0.999674	-0.000107298	0.300727	0.318173	0.325	9.25177e-131	0.999674	-7.08129e-05	0.300727	0.209983	0.216667	9.25177e-131	0.999358	-0.000302507	2.76773e-05	0.149037	0.15	7.07686e-120
0.01	0.01	1	0.75	0.9	0.675	1	-1.23727	-1.21808	0.07	0.099	0.998943	-0.00578985	1.22688e-44	0.315279	0.325	7.07248e-112	0.998943	-0.00286647	1.22688e-44	0.15609	0.1625	7.07248e-112	0.997248	-0.00304829	3.81996e-41	0.115586	0.1125	1.72192e-96
0.01	0.02	2	0.75	0.9	0.675	1	0.31467	0.312458	0.115	0.164	0.995947	0.00395739	1.49922e-17	0.309882	0.325	2.84996e-90	0.995947	0.00127439	1.49922e-17	0.0997913	0.108333	2.84996e-90	0.988385	0.00129939	1.07949e-13	0.0735385	0.075	2.36695e-73
0.01	0.05	5	0.75	0.9	0.675	1	-0.782683	-0.77984	0.389	0.42	0.971694	-0.0217593	1.28462e-36	0.296902	0.325	4.91389e-59	0.971694	-0.00344779	1.28462e-36	0.0470444	0.0541667	4.91389e-59	0.945474	-0.00327697	5.60062e-29	0.0419581	0.0375	1.70577e-48
0.1	0.02	0.2	0.75	0.9	0.675	1	0.480512	0.48061	0.007	0.01	0.999963	0.000356598	8.14965e-19	0.274446	0.325	1.31399e-165	0.999963	0.00028406	8.14965e-19	0.218619	0.270833	1.31399e-165	0.999733	9.67024e-05	0.0413593	0.1592	0.1875	5.37192e-134
0.1	0.05	0.5	0.75	0.9	0.675	1	-0.0142339	-0.0142381	0.02	0.029	0.999707	-3.90656e-05	0.649021	0.278761	0.325	1.73897e-132	0.999707	-2.40384e-05	0.649021	0.171531	0.216667	1.73897e-132	0.999404	-8.58491e-05	0.109561	0.12119	0.15	4.42024e-121
0.1	0.1	1	0.75	0.9	0.675	1	-1.35945	-1.34892	0.057	0.079	0.999403	-0.00456418	1.04298e-49	0.279662	0.325	4.76626e-121	0.999403	-0.00205447	1.04298e-49	0.125884	0.1625	4.76626e-121	0.998606	-0.00215849	8.22683e-47	0.0951612	0.1125	2.0379e-107
0.1	0.2	2	0.75	0.9	0.675	1	0.107127	0.106866	0.086	0.123	0.996197	0.000599158	0.0630168	0.286807	0.325	2.70867e-91	0.996197	0.000173541	0.0630168	0.0830712	0.108333	2.70867e-91	0.992662	3.89921e-06	0.967526	0.0619813	0.075	9.84159e-81
0.1	0.5	5	0.75	0.9	0.675	1	-0.792284	-0.791645	0.242	0.294	0.984325	-0.0128362	7.35457e-32	0.280892	0.325	1.55586e-68	0.984325	-0.00183015	7.35457e-32	0.040049	0.0541667	1.55586e-68	0.974478	-0.0017306	4.85215e-28	0.0340815	0.0375	1.06421e-60
0.001	0.0002	0.2	0.25	0.1	0.025	2	1.38992	1.2254	0.001	0.004	0.99999	7.08181e-05	0.201869	0.975599	0.975	6.46555e-187	0.99999	5.90549e-05	0.201869	0.813547	0.8125	6.46555e-187	0.98419	-0.000843938	9.99004e-05	0.0903633	0.0625	2.13837e-68
0.001	0.0005	0.5	0.25	0.1	0.025	2	1.12487	1.08033	0.003	0.042	0.999945	0.00115116	2.7295e-13	0.975605	0.975	2.20943e-159	0.999945	0.000764922	2.7295e-13	0.648268	0.65	2.20943e-159	0.983093	0.000140929	0.354027	0.0643256	0.05	2.55697e-67
0.001	0.001	1	0.25	0.1	0.025	2	-0.508153	-0.500191	0.014	0.207	0.999865	-0.00184762	9.46136e-14	0.97282	0.975	5.89509e-145	0.999865	-0.000923437	9.46136e-14	0.486214	0.4875	5.89509e-145	0.98213	-0.00118133	2.52689e-15	0.0490476	0.0375	1.98712e-66
0.001	0.002	2	0.25	0.1	0.025	2	-1.24161	-1.22801	0.046	0.501	0.999589	-0.0123602	1.5947e-47	0.980324	0.975	4.96095e-127	0.999589	-0.00407376	1.5947e-47	0.323101	0.325	4.96095e-127	0.958974	-0.00438765	7.17377e-44	0.0385432	0.025	4.54795e-53
0.001	0.005	5	0.25	0.1	0.025	2	1.42008	1.40521	0.059	0.501	0.995927	0.0419742	3.32124e-51	0.936032	0.975	3.42181e-90	0.995927	0.0070059	3.32124e-51	0.156233	0.1625	3.42181e-90	0.20138	0.00707279	2.07155e-48	0.00555053	0.0125	4.78746e-05
0.01	0.002	0.2	0.25	0.1	0.025	2	0.172382	0.168433	0.001	0.007	0.999993	7.51807e-06	0.865894	0.97421	0.975	8.94693e-194	0.999993	6.23739e-06	0.865894	0.808257	0.8125	8.94693e-194	0.981834	-0.00102535	2.31286e-05	0.0931306	0.0625	3.652e-66
0.01	0.005	0.5	0.25	0.1	0.025	2	1.10839	1.07717	0.003	0.039	0.999941	0.00108363	8.80452e-12	0.976774	0.975	2.425e-158	0.999941	0.00071294	8.80452e-12	0.642637	0.65	2.425e-158	0.987329	0.000174522	0.201692	0.0667635	0.05	5.91937e-72
0.01	0.01	1	0.25	0.1	0.025	2	-0.629906	-0.621053	0.013	0.194	0.999887	-0.00214408	2.36776e-18	0.968057	0.975	9.20138e-148	0.999887	-0.00105758	2.36776e-18	0.477501	0.4875	9.20138e-148	0.988273	-0.00105614	2.52228e-19	0.0445007	0.0375	3.37101e-73
0.01	0.02	2	0.25	0.1	0.025	2	-1.33201	-1.31996	0.042	0.501	0.999442	-0.0110969	7.49632e-40	0.977477	0.975	3.99247e-122	0.999442	-0.00359336	7.49632e-40	0.316522	0.325	3.99247e-122	0.951949	-0.00403065	5.23535e-40	0.0371521	0.025	1.58246e-50
0.01	0.05	5	0.25	0.1	0.025	2	1.50149	1.49161	0.047	0.501	0.998163	0.0371137	1.91615e-58	0.976577	0.975	5.46786e-103	0.998163	0.00603708	1.91615e-58	0.158854	0.1625	5.46786e-103	0.41867	0.00625628	7.13291e-55	0.00672254	0.0125	2.69745e-10
0.1	0.02	0.2	0.25	0.1	0.025	2	1.74401	1.7316	0.001	0.003	0.999995	0.000135132	0.000998403	0.968072	0.975	2.30811e-197	0.999995	0.000107814	0.000998403	0.77237	0.8125	2.30811e-197	0.986572	-0.000904165	7.02758e-05	0.1027	0.0625	5.07101e-71
0.1	0.05	0.5	0.25	0.1	0.025	2	0.729649	0.725507	0.003	0.031	0.999973	0.000530818	9.79304e-08	0.971715	0.975	5.11103e-171	0.999973	0.000325447	9.79304e-08	0.595764	0.65	5.11103e-171	0.989621	-0.000234293	0.0735674	0.0703658	0.05	3.68279e-75
0.1	0.1	1	0.25	0.1	0.025	2	-0.504137	-0.50197	0.009	0.118	0.999889	-0.00128595	7.38757e-10	0.964715	0.975	4.23004e-148	0.999889	-0.000576839	7.38757e-10	0.432741	0.4875	4.23004e-148	0.978674	-0.000766783	5.15777e-08	0.0478228	0.0375	1.37978e-63
0.1	0.2	2	0.25	0.1	0.025	2	-1.18072	-1.17953	0.026	0.312	0.999735	-0.00681093	1.78417e-36	0.978364	0.975	4.47923e-134	0.999735	-0.00197808	1.78417e-36	0.284144	0.325	4.47923e-134	0.968867	-0.0020538	7.98572e-29	0.0354359	0.025	1.66607e-57
0.1	0.5	5	0.25	0.1	0.025	2	1.5762	1.57224	0.026	0.501	0.998409	0.0243585	7.28061e-48	0.970903	0.975	2.68125e-105	0.998409	0.00350982	7.28061e-48	0.139898	0.1625	2.68125e-105	0.730665	0.00336765	3.18218e-46	0.00931769	0.0125	8.96958e-23
0.001	0.0002	0.2	0.5	0.1	0.05	2	0.272761	0.245158	0.001	0.011	0.999989	-1.12396e-05	0.844363	0.951772	0.95	6.08955e-185	0.999989	-9.35526e-06	0.844363	0.792206	0.791667	6.08955e-185	0.981831	-0.000621594	5.28503e-05	0.0594301	0.0416667	3.67429e-66
0.001	0.0005	0.5	0.5	0.1	0.05	2	0.730462	0.702421	0.003	0.086	0.999951	0.000843497	5.72931e-10	0.9474	0.95	2.45051e-161	0.999951	0.000562937	5.72931e-10	0.63228	0.633333	2.45051e-161	0.977673	0.000276016	0.0113188	0.0392527	0.0333333	7.54503e-63
0.001	0.001	1	0.5	0.1	0.05	2	0.73327	0.728222	0.01	0.249	0.999816	0.00292007	2.726e-20	0.945031	0.95	5.91339e-140	0.999816	0.00145643	2.726e-20	0.471349	0.475	5.91339e-140	0.939303	0.00105965	4.92173e-10	0.0324977	0.025	9.04449e-47
0.001	0.002	2	0.5	0.1	0.05	2	-0.208984	-0.208123	0.036	0.501	0.998989	-0.00212042	0.000179531	0.943141	0.95	1.38564e-112	0.998989	-0.000703564	0.000179531	0.312938	0.316667	1.38564e-112	0.836762	-0.000619296	9.1552e-05	0.0189146	0.0166667	7.54889e-31
0.001	0.005	5	0.5	0.1	0.05	2	1.16791	1.15354	0.067	0.501	0.995246	0.033057	1.15963e-43	0.875092	0.95	1.04674e-87	0.995246	0.00573111	1.15963e-43	0.151715	0.158333	1.04674e-87	0.00948774	0.00580413	4.6674e-50	0.000841061	0.00833333	0.402549
0.01	0.002	0.2	0.5	0.1	0.05	2	0.785921	0.762067	0.001	0.01	0.999995	6.23094e-05	0.0942377	0.950373	0.95	5.03539e-199	0.999995	5.16358e-05	0.0942377	0.787574	0.791667	5.03539e-199	0.981587	-0.000587606	0.000190941	0.0609827	0.0416667	6.02218e-66
0.01	0.005	0.5	0.5	0.1	0.05	2	0.922587	0.903044	0.003	0.074	0.999947	0.00102928	2.95383e-12	0.947841	0.95	5.20515e-160	0.999947	0.000680401	2.95383e-12	0.626568	0.633333	5.20515e-160	0.969421	0.000251757	0.0624444	0.0418328	0.0333333	8.56885e-58
0.01	0.01	1	0.5	0.1	0.05	2	1.09598	1.0889	0.008	0.2	0.999907	0.00383082	4.30458e-36	0.944908	0.95	5.13556e-151	0.999907	0.00188336	4.30458e-36	0.464549	0.475	5.13556e-151	0.97366	0.00166154	1.99108e-27	0.0329681	0.025	3.4239e-60
0.01	0.02	2	0.5	0.1	0.05	2	-0.11829	-0.117739	0.032	0.501	0.999003	-0.00081951	0.126368	0.936859	0.95	8.19672e-113	0.999003	-0.000266957	0.126368	0.305184	0.316667	8.19672e-113	0.815846	-0.000263857	0.0737046	0.0170901	0.0166667	6.61365e-29
0.01	0.05	5	0.5	0.1	0.05	2	1.05208	1.04126	0.059	0.501	0.995841	0.024438	8.39661e-36	0.906328	0.95	7.3743e-90	0.995841	0.00409099	8.39661e-36	0.151722	0.158333	7.3743e-90	0.246722	0.00414952	8.1002e-43	0.00447024	0.00833333	5.02459e-06
0.1	0.02	0.2	0.5	0.1	0.05	2	-1.04469	-1.04129	0.001	0.012	0.999993	-8.84647e-05	0.0571869	0.938521	0.95	1.47032e-191	0.999993	-7.04947e-05	0.0571869	0.747877	0.791667	1.47032e-191	0.983325	-0.000789986	3.87297e-06	0.0678615	0.0416667	1.53411e-67
0.1	0.05	0.5	0.5	0.1	0.05	2	0.82712	0.823832	0.003	0.054	0.999978	0.000712484	8.884e-14	0.935764	0.95	2.21516e-174	0.999978	0.000438899	8.884e-14	0.576443	0.633333	2.21516e-174	0.986876	8.45134e-05	0.34157	0.0427408	0.0333333	2.17574e-71
0.1	0.1	1	0.5	0.1	0.05	2	1.22796	1.22698	0.005	0.12	0.999899	0.00289087	1.25112e-27	0.932796	0.95	1.19578e-149	0.999899	0.00129288	1.25112e-27	0.417174	0.475	1.19578e-149	0.978457	0.00108986	1.92866e-20	0.0320376	0.025	2.00672e-63
0.1	0.2	2	0.5	0.1	0.05	2	-0.262536	-0.261548	0.022	0.471	0.999659	-0.00104593	0.00126764	0.943079	0.95	4.82723e-130	0.999659	-0.000304469	0.00126764	0.27453	0.316667	4.82723e-130	0.916318	-0.000497976	3.74455e-05	0.0209676	0.0166667	1.32341e-41
0.1	0.5	5	0.5	0.1	0.05	2	0.995714	0.991826	0.037	0.501	0.998176	0.0150511	2.69817e-33	0.922759	0.95	4.22859e-103	0.998176	0.00220687	2.69817e-33	0.1353	0.158333	4.22859e-103	0.657668	0.00217759	8.53782e-37	0.0069855	0.00833333	6.73716e-19
0.001	0.0002	0.2	0.75	0.1	0.075	2	-1.65164	-1.45125	0.001	0.046	0.99999	-0.000172518	0.00131562	0.92516	0.925	3.17751e-187	0.99999	-0.0001438	0.00131562	0.771157	0.770833	3.17751e-187	0.986973	-0.000381942	1.66804e-08	0.0293016	0.0208333	1.65206e-71
0.001	0.0005	0.5	0.75	0.1	0.075	2	0.301029	0.291413	0.004	0.279	0.999954	0.00030692	0.00748341	0.917046	0.925	3.48374e-162	0.999954	0.000205676	0.00748341	0.614539	0.616667	3.48374e-162	0.953714	-2.13394e-05	0.790734	0.0203051	0.0166667	3.95875e-51
0.001	0.001	1	0.75	0.1	0.075	2	-0.0694508	-0.0676255	0.015	0.501	0.999795	-9.1896e-05	0.696677	0.914802	0.925	3.35958e-138	0.999795	-4.60298e-05	0.696677	0.458215	0.4625	3.35958e-138	0.895878	-0.000278061	0.0121776	0.0177166	0.0125	4.34671e-38
0.001	0.002	2	0.75	0.1	0.075	2	-2.05883	-2.03133	0.057	0.501	0.999396	-0.0209339	1.69391e-58	0.95992	0.925	7.11932e-121	0.999396	-0.00689442	1.69391e-58	0.316143	0.308333	7.11932e-121	0.840326	-0.00691535	3.88118e-61	0.0164303	0.00833333	3.32801e-31
0.001	0.005	5	0.75	0.1	0.075	2	1.3893	1.37538	0.06	0.501	0.995825	0.0395996	6.61108e-50	0.910023	0.925	8.51563e-90	0.995825	0.00665552	6.61108e-50	0.152948	0.154167	8.51563e-90	0.0325584	0.00669707	1.68394e-49	0.00185254	0.00416667	0.118808
0.01	0.002	0.2	0.75	0.1	0.075	2	-2.96124	-2.85424	0.001	0.051	0.999991	-0.000345327	8.58711e-10	0.922985	0.925	9.01849e-189	0.999991	-0.000286115	8.58711e-10	0.764725	0.770833	9.01849e-189	0.980636	-0.00056899	1.133e-10	0.0301368	0.0208333	3.87735e-65
0.01	0.005	0.5	0.75	0.1	0.075	2	0.105485	0.102955	0.004	0.27	0.999964	9.76678e-05	0.327847	0.915755	0.925	6.13849e-166	0.999964	6.47855e-05	0.327847	0.607443	0.616667	6.13849e-166	0.946728	-5.81706e-05	0.467721	0.0187548	0.0166667	7.20649e-49
0.01	0.01	1	0.75	0.1	0.075	2	-0.079301	-0.0775943	0.014	0.501	0.999925	-0.000190603	0.185332	0.917587	0.925	2.46562e-154	0.999925	-9.41918e-05	0.185332	0.453451	0.4625	2.46562e-154	0.873136	-0.000281997	0.01508	0.0165969	0.0125	6.57733e-35
0.01	0.02	2	0.75	0.1	0.075	2	-2.06775	-2.04239	0.051	0.501	0.999552	-0.0183568	9.25977e-60	0.937837	0.925	1.20935e-125	0.999552	-0.00594206	9.25977e-60	0.303577	0.308333	1.20935e-125	0.889443	-0.00615687	7.28178e-61	0.0182447	0.00833333	4.01152e-37
0.01	0.05	5	0.75	0.1	0.075	2	1.34402	1.33617	0.053	0.501	0.996706	0.0331056	6.54306e-48	0.914878	0.925	1.32717e-93	0.996706	0.00538684	6.54306e-48	0.148866	0.154167	1.32717e-93	0.000523197	0.00541206	1.20973e-44	0.000219238	0.00416667	0.84451
0.1	0.02	0.2	0.75	0.1	0.075	2	-2.29026	-2.27905	0.001	0.04	0.999993	-0.000249993	6.50785e-08	0.907074	0.925	1.543e-193	0.999993	-0.000199199	6.50785e-08	0.722772	0.770833	1.543e-193	0.985497	-0.00053587	4.35762e-10	0.0343019	0.0208333	8.77284e-70
0.1	0.05	0.5	0.75	0.1	0.075	2	0.0222089	0.0220026	0.003	0.191	0.99996	9.86278e-05	0.339386	0.901249	0.925	2.44061e-164	0.99996	6.09703e-05	0.339386	0.557139	0.616667	2.44061e-164	0.943458	-0.000196277	0.0408023	0.0214986	0.0166667	6.54422e-48
0.1	0.1	1	0.75	0.1	0.075	2	-0.0433413	-0.0429428	0.01	0.416	0.999901	-0.000110236	0.495677	0.904056	0.925	5.98949e-150	0.999901	-4.95174e-05	0.495677	0.406097	0.4625	5.98949e-150	0.932535	-3.96449e-05	0.614411	0.0162641	0.0125	4.53558e-45
0.1	0.2	2	0.75	0.1	0.075	2	-1.74223	-1.73221	0.032	0.501	0.999404	-0.010102	1.26779e-37	0.930456	0.925	4.35059e-121	0.999404	-0.00292757	1.26779e-37	0.269648	0.308333	4.35059e-121	0.821334	-0.00302621	1.74481e-39	0.0136798	0.00833333	2.15211e-29
0.1	0.5	5	0.75	0.1	0.075	2	1.45884	1.45729	0.03	0.501	0.998885	0.0216389	4.82097e-51	0.928716	0.925	5.12491e-111	0.998885	0.0030977	4.82097e-51	0.13295	0.154167	5.12491e-111	0.0728956	0.00317428	1.82732e-43	0.00163941	0.00416667	0.0183386
0.001	0.0002	0.2	0.25	0.5	0.125	2	-0.619348	-0.595423	0.002	0.004	0.999988	-0.000228019	7.98764e-05	0.875104	0.875	1.16476e-183	0.999988	-0.000189998	7.98764e-05	0.729187	0.729167	1.16476e-183	0.996273	-0.00231165	4.47395e-07	0.381088	0.3125	1.28408e-91
0.001	0.0005	0.5	0.25	0.5	0.125	2	-0.114167	-0.111391	0.007	0.016	0.999943	-0.000288457	0.0168377	0.873362	0.875	7.72323e-159	0.999943	-0.000191978	0.0168377	0.581253	0.583333	7.72323e-159	0.997578	-0.00143908	3.82878e-07	0.292475	0.25	1.51264e-98
0.001	0.001	1	0.25	0.5	0.125	2	-1.37176	-1.35171	0.025	0.057	0.999664	-0.00637384	3.43038e-34	0.882652	0.875	2.68262e-130	0.999664	-0.00317505	3.43038e-34	0.439683	0.4375	2.68262e-130	0.998033	-0.00379896	8.97055e-35	0.212717	0.1875	6.83532e-102
0.001	0.002	2	0.25	0.5	0.125	2	2.34679	2.32744	0.01	0.025	0.999067	0.0240192	3.35699e-59	0.866042	0.875	7.07733e-114	0.999067	0.00799818	3.35699e-59	0.288384	0.291667	7.07733e-114	0.99605	0.00803483	3.69331e-62	0.127913	0.125	1.0963e-90
0.001	0.005	5	0.25	0.5	0.125	2	0.604702	0.595366	0.094	0.196	0.993284	0.017905	7.25056e-25	0.786671	0.875	3.72042e-82	0.993284	0.00318439	7.25056e-25	0.139909	0.145833	3.72042e-82	0.977252	0.00299114	2.08858e-23	0.0752156	0.0625	1.50651e-62
0.01	0.002	0.2	0.25	0.5	0.125	2	-0.196963	-0.194266	0.002	0.003	0.999994	-2.41532e-05	0.543937	0.872037	0.875	7.49249e-194	0.999994	-2.00292e-05	0.543937	0.72314	0.729167	7.49249e-194	0.99623	-0.00217834	1.75335e-06	0.380646	0.3125	1.95058e-91
0.01	0.005	0.5	0.25	0.5	0.125	2	-0.407199	-0.400432	0.007	0.016	0.999956	-0.000626433	6.03236e-08	0.870698	0.875	8.45977e-163	0.999956	-0.000412838	6.03236e-08	0.573817	0.583333	8.45977e-163	0.997945	-0.00166859	7.96853e-10	0.291226	0.25	3.46312e-101
0.01	0.01	1	0.25	0.5	0.125	2	-1.43316	-1.41615	0.023	0.052	0.999774	-0.0061544	4.29352e-39	0.874547	0.875	1.18575e-136	0.999774	-0.00302612	4.29352e-39	0.430015	0.4375	1.18575e-136	0.998554	-0.0035369	2.31355e-37	0.210924	0.1875	7.7199e-107
0.01	0.02	2	0.25	0.5	0.125	2	2.48524	2.47282	0.007	0.019	0.999527	0.0235795	7.41417e-70	0.850998	0.875	8.92459e-125	0.999527	0.00772983	7.41417e-70	0.278975	0.291667	8.92459e-125	0.99587	0.00753218	1.09457e-59	0.126874	0.125	5.72562e-90
0.01	0.05	5	0.25	0.5	0.125	2	0.687688	0.680485	0.078	0.165	0.996338	0.0167999	1.58475e-30	0.803822	0.875	6.69898e-92	0.996338	0.00289309	1.58475e-30	0.138425	0.145833	6.69898e-92	0.987397	0.00291588	1.90489e-31	0.0723619	0.0625	4.85762e-72
0.1	0.02	0.2	0.25	0.5	0.125	2	-0.267091	-0.26652	0.002	0.003	0.999989	-4.47517e-06	0.928092	0.845429	0.875	9.48433e-186	0.999989	-3.56762e-06	0.928092	0.673978	0.729167	9.48433e-186	0.997348	-0.00185622	1.06285e-06	0.377721	0.3125	4.35593e-97
0.1	0.05	0.5	0.25	0.5	0.125	2	-0.326427	-0.325368	0.006	0.012	0.999957	-0.000457599	1.87645e-05	0.846786	0.875	3.82635e-163	0.999957	-0.000280958	1.87645e-05	0.519912	0.583333	3.82635e-163	0.998317	-0.00125318	4.65937e-08	0.279861	0.25	2.14856e-104
0.1	0.1	1	0.25	0.5	0.125	2	-1.73951	-1.73014	0.018	0.037	0.999887	-0.00505119	3.39601e-44	0.853322	0.875	9.00388e-148	0.999887	-0.00226115	3.39601e-44	0.381987	0.4375	9.00388e-148	0.998475	-0.002814	6.91205e-32	0.198638	0.1875	5.59294e-106
0.1	0.2	2	0.25	0.5	0.125	2	2.38222	2.37925	0.006	0.013	0.999332	0.0149366	9.05738e-51	0.835571	0.875	3.07501e-119	0.999332	0.00439756	9.05738e-51	0.246004	0.291667	3.07501e-119	0.99803	0.0041187	3.13074e-54	0.119853	0.125	7.21465e-102
0.1	0.5	5	0.25	0.5	0.125	2	1.01181	1.00834	0.041	0.091	0.998181	0.0156344	5.15135e-38	0.812427	0.875	3.78095e-103	0.998181	0.00233458	5.15135e-38	0.121314	0.145833	3.78095e-103	0.984495	0.00215691	2.75256e-25	0.0610462	0.0625	1.03858e-68
0.001	0.0002	0.2	0.5	0.5	0.25	2	-0.0445105	-0.0432607	0.002	0.005	0.999979	-6.19615e-05	0.316413	0.74926	0.75	7.0482e-175	0.999979	-5.16529e-05	0.316413	0.624604	0.625	7.0482e-175	0.995757	-0.00147168	4.16271e-06	0.253157	0.208333	1.5461e-89
0.001	0.0005	0.5	0.5	0.5	0.25	2	-0.158153	-0.157345	0.008	0.024	0.99991	-0.00027208	0.0362909	0.749098	0.75	2.21718e-151	0.99991	-0.000181443	0.0362909	0.499555	0.5	2.21718e-151	0.997893	-0.00098839	2.63489e-08	0.192898	0.166667	8.77109e-101
0.001	0.001	1	0.5	0.5	0.25	2	-1.34271	-1.32294	0.028	0.086	0.999832	-0.00624801	1.72716e-48	0.751376	0.75	1.99608e-141	0.999832	-0.00312614	1.72716e-48	0.375944	0.375	1.99608e-141	0.997665	-0.00354674	1.49623e-41	0.144054	0.125	3.88868e-99
0.001	0.002	2	0.5	0.5	0.25	2	-1.1573	-1.13296	0.067	0.197	0.998818	-0.0132397	2.96958e-41	0.763949	0.75	4.45194e-110	0.998818	-0.00439482	2.96958e-41	0.253588	0.25	4.45194e-110	0.991084	-0.00450618	5.67977e-40	0.0985045	0.0833333	1.33131e-77
0.001	0.005	5	0.5	0.5	0.25	2	-0.761971	-0.749926	0.159	0.462	0.991494	-0.0212022	1.50855e-28	0.715492	0.75	2.33028e-78	0.991494	-0.0036129	1.50855e-28	0.121921	0.125	2.33028e-78	0.956581	-0.0038078	3.07455e-32	0.048676	0.0416667	3.71061e-52
0.01	0.002	0.2	0.5	0.5	0.25	2	0.233232	0.230987	0.002	0.004	0.999989	8.26021e-05	0.0687459	0.744211	0.75	7.33349e-185	0.999989	6.85146e-05	0.0687459	0.617288	0.625	7.33349e-185	0.996198	-0.00137107	5.44657e-06	0.252734	0.208333	2.68094e-91
0.01	0.005	0.5	0.5	0.5	0.25	2	-0.167621	-0.166624	0.008	0.022	0.999963	-0.000320981	0.000171448	0.74301	0.75	1.09078e-165	0.999963	-0.000211884	0.000171448	0.490471	0.5	1.09078e-165	0.997176	-0.00100293	4.98634e-07	0.190964	0.166667	4.45544e-96
0.01	0.01	1	0.5	0.5	0.25	2	-1.38814	-1.37334	0.027	0.08	0.999762	-0.00576129	6.11251e-41	0.748839	0.75	8.08696e-136	0.999762	-0.00284046	6.11251e-41	0.369197	0.375	8.08696e-136	0.997223	-0.00340712	4.06346e-38	0.142696	0.125	2.39849e-96
0.01	0.02	2	0.5	0.5	0.25	2	-1.12441	-1.10665	0.06	0.177	0.99912	-0.0111365	5.34649e-41	0.751399	0.75	8.04254e-115	0.99912	-0.00363371	5.34649e-41	0.245172	0.25	8.04254e-115	0.993319	-0.0038798	5.73855e-42	0.0916473	0.0833333	3.05977e-82
0.01	0.05	5	0.5	0.5	0.25	2	-0.72831	-0.717827	0.135	0.394	0.993039	-0.0176064	1.92167e-25	0.742232	0.75	1.40151e-81	0.993039	-0.00292655	1.92167e-25	0.123374	0.125	1.40151e-81	0.958889	-0.00282524	1.14868e-27	0.0441193	0.0416667	4.91013e-53
0.1	0.02	0.2	0.5	0.5	0.25	2	1.47715	1.47551	0.001	0.002	0.999991	0.000288747	5.97326e-11	0.702025	0.75	1.97618e-188	0.999991	0.000230334	5.97326e-11	0.560007	0.625	1.97618e-188	0.997178	-0.000900684	0.000207808	0.242188	0.208333	4.32743e-96
0.1	0.05	0.5	0.5	0.5	0.25	2	-0.314186	-0.313808	0.006	0.017	0.99997	-0.000342888	4.86216e-06	0.704907	0.75	6.15879e-169	0.99997	-0.000211117	4.86216e-06	0.434014	0.5	6.15879e-169	0.99779	-0.000918654	5.59743e-08	0.180288	0.166667	5.13033e-100
0.1	0.1	1	0.5	0.5	0.25	2	-1.45199	-1.44416	0.02	0.055	0.999868	-0.00426206	3.37534e-42	0.712318	0.75	2.87288e-145	0.999868	-0.00191071	3.37534e-42	0.319337	0.375	2.87288e-145	0.99876	-0.00216837	1.21118e-39	0.129046	0.125	2.64148e-109
0.1	0.2	2	0.5	0.5	0.25	2	-1.10928	-1.10419	0.04	0.114	0.999507	-0.0069356	5.07831e-37	0.716758	0.75	4.12692e-124	0.999507	-0.00202472	5.07831e-37	0.209245	0.25	4.12692e-124	0.996068	-0.00231034	1.40175e-37	0.0828048	0.0833333	9.28009e-91
0.1	0.5	5	0.5	0.5	0.25	2	-0.562067	-0.556978	0.082	0.239	0.997111	-0.00943651	2.23429e-21	0.733549	0.75	1.03625e-95	0.997111	-0.00138613	2.23429e-21	0.107751	0.125	1.03625e-95	0.974335	-0.00114895	5.90003e-16	0.0383407	0.0416667	1.30878e-60
0.001	0.0002	0.2	0.75	0.5	0.375	2	-0.84112	-0.810152	0.003	0.012	0.999987	-0.000263205	7.67161e-09	0.623391	0.625	1.88894e-182	0.999987	-0.000219268	7.67161e-09	0.51933	0.520833	1.88894e-182	0.995767	-0.000922181	2.41127e-08	0.126418	0.104167	1.41981e-89
0.001	0.0005	0.5	0.75	0.5	0.375	2	-0.0497552	-0.0484664	0.01	0.049	0.999906	-8.32456e-05	0.444878	0.624775	0.625	8.57555e-151	0.999906	-5.54654e-05	0.444878	0.416279	0.416667	8.57555e-151	0.993819	-0.000561955	9.78118e-05	0.0965591	0.0833333	1.72694e-83
0.001	0.001	1	0.75	0.5	0.375	2	-1.43185	-1.41535	0.036	0.172	0.999765	-0.00670842	5.86777e-51	0.629497	0.625	4.71549e-136	0.999765	-0.00334755	5.86777e-51	0.314124	0.3125	4.71549e-136	0.990081	-0.00370606	6.38207e-39	0.0795911	0.0625	6.88579e-76
0.001	0.002	2	0.75	0.5	0.375	2	0.455187	0.451875	0.049	0.299	0.99748	0.00538225	8.05091e-15	0.616297	0.625	6.62323e-98	0.99748	0.00178156	8.05091e-15	0.203998	0.208333	6.62323e-98	0.923686	0.00155111	1.22297e-11	0.0375955	0.0416667	4.35509e-43
0.001	0.005	5	0.75	0.5	0.375	2	-0.211413	-0.210462	0.18	0.501	0.986936	-0.00649605	2.9068e-06	0.622396	0.625	1.83201e-71	0.986936	-0.00107891	2.9068e-06	0.103372	0.104167	1.83201e-71	0.678118	-0.0012118	7.0822e-07	0.0181099	0.0208333	6.79704e-20
0.01	0.002	0.2	0.75	0.5	0.375	2	-0.703604	-0.691225	0.003	0.011	0.999984	-0.000207624	9.54406e-06	0.616412	0.625	1.41281e-179	0.999984	-0.000172077	9.54406e-06	0.510876	0.520833	1.41281e-179	0.995548	-0.000875426	1.16427e-07	0.124567	0.104167	9.20045e-89
0.01	0.005	0.5	0.75	0.5	0.375	2	0.0875794	0.0861454	0.009	0.045	0.999909	0.000260237	0.0159313	0.61728	0.625	2.81408e-151	0.999909	0.000171808	0.0159313	0.407528	0.416667	2.81408e-151	0.996196	-0.000335065	0.00237718	0.0961864	0.0833333	2.73091e-91
0.01	0.01	1	0.75	0.5	0.375	2	-1.36702	-1.35508	0.033	0.157	0.999776	-0.00588595	4.50417e-48	0.620972	0.625	8.85556e-137	0.999776	-0.00289875	4.50417e-48	0.30582	0.3125	8.85556e-137	0.989124	-0.00330221	1.48994e-35	0.0761422	0.0625	2.07367e-74
0.01	0.02	2	0.75	0.5	0.375	2	0.447094	0.443478	0.044	0.268	0.998876	0.0041777	5.3144e-18	0.608724	0.625	6.8835e-111	0.998876	0.00135902	5.3144e-18	0.198019	0.208333	6.8835e-111	0.965825	0.00114374	8.36259e-12	0.0419037	0.0416667	5.25225e-56
0.01	0.05	5	0.75	0.5	0.375	2	0.0391014	0.0388864	0.146	0.501	0.990344	0.00039657	0.725805	0.636876	0.625	2.54396e-76	0.990344	6.45277e-05	0.725805	0.103629	0.104167	2.54396e-76	0.717606	0.00018173	0.213784	0.0128967	0.0208333	5.21615e-22
0.1	0.02	0.2	0.75	0.5	0.375	2	-0.83805	-0.83639	0.002	0.009	0.999984	-0.000191455	1.15964e-05	0.56603	0.625	4.31602e-179	0.999984	-0.000152617	1.15964e-05	0.451206	0.520833	4.31602e-179	0.997051	-0.000708073	2.99782e-08	0.117349	0.104167	2.20479e-95
0.1	0.05	0.5	0.75	0.5	0.375	2	-0.169237	-0.168788	0.008	0.036	0.999917	-0.000183165	0.0540436	0.57215	0.625	1.08952e-152	0.999917	-0.000112802	0.0540436	0.352358	0.416667	1.08952e-152	0.997518	-0.000446482	2.3191e-07	0.0876942	0.0833333	3.73428e-98
0.1	0.1	1	0.75	0.5	0.375	2	-1.33521	-1.32848	0.025	0.113	0.999737	-0.00421343	9.14922e-38	0.581551	0.625	3.06527e-134	0.999737	-0.00188774	9.14922e-38	0.260552	0.3125	3.06527e-134	0.994366	-0.00213886	4.57614e-36	0.0674706	0.0625	5.5827e-85
0.1	0.2	2	0.75	0.5	0.375	2	0.699787	0.696225	0.028	0.156	0.999014	0.00456669	9.689e-23	0.573553	0.625	5.49376e-113	0.999014	0.00133287	9.689e-23	0.167402	0.208333	5.49376e-113	0.985985	0.00119624	6.22267e-25	0.0361522	0.0416667	2.46696e-70
0.1	0.5	5	0.75	0.5	0.375	2	0.403533	0.401767	0.082	0.501	0.995863	0.00660043	2.46695e-15	0.57322	0.625	6.07071e-90	0.995863	0.000955103	2.46695e-15	0.0829469	0.104167	6.07071e-90	0.932895	0.000876732	4.39249e-19	0.015173	0.0208333	3.71925e-45
0.001	0.0002	0.2	0.25	0.9	0.225	2	-0.461984	-0.456251	0.004	0.005	0.999988	-0.000403661	3.18625e-12	0.774928	0.775	1.49655e-183	0.999988	-0.000335811	3.18625e-12	0.644672	0.645833	1.49655e-183	0.999856	-0.00091681	2.74128e-10	0.583903	0.5625	7.21925e-144
0.001	0.0005	0.5	0.25	0.9	0.225	2	-1.57447	-1.55257	0.016	0.019	0.999946	-0.0039492	1.20536e-50	0.780539	0.775	1.15982e-159	0.999946	-0.00261954	1.20536e-50	0.517738	0.516667	1.15982e-159	0.9998	-0.00314233	7.17219e-40	0.462189	0.45	1.28409e-138
0.001	0.001	1	0.25	0.9	0.225	2	-2.33493	-2.30412	0.04	0.046	0.999746	-0.0128392	3.21765e-63	0.780462	0.775	9.03257e-135	0.999746	-0.0064657	3.21765e-63	0.393033	0.3875	9.03257e-135	0.999609	-0.00675242	1.03258e-61	0.347308	0.3375	7.31275e-128
0.001	0.002	2	0.25	0.9	0.225	2	-0.0691715	-0.0688061	0.055	0.064	0.999078	-9.80894e-05	0.818174	0.781463	0.775	4.51715e-114	0.999078	-3.25357e-05	0.818174	0.259207	0.258333	4.51715e-114	0.998608	-0.000534029	0.000754695	0.227172	0.225	1.91329e-107
0.001	0.005	5	0.25	0.9	0.225	2	0.102759	0.103148	0.126	0.156	0.990457	0.00368645	0.011023	0.804042	0.775	1.64672e-76	0.990457	0.000618374	0.011023	0.134872	0.129167	1.64672e-76	0.993643	0.000588033	0.000315742	0.10859	0.1125	4.87385e-83
0.01	0.002	0.2	0.25	0.9	0.225	2	0.26484	0.26277	0.003	0.004	0.999987	0.000162501	0.0018181	0.769582	0.775	3.30262e-182	0.999987	0.000134522	0.0018181	0.637078	0.645833	3.30262e-182	0.999869	-0.000434577	0.000455885	0.576568	0.5625	2.31421e-145
0.01	0.005	0.5	0.25	0.9	0.225	2	-1.73125	-1.70667	0.016	0.018	0.999912	-0.00430186	5.37372e-46	0.777944	0.775	6.87859e-152	0.999912	-0.00282762	5.37372e-46	0.511344	0.516667	6.87859e-152	0.999804	-0.00313836	1.3384e-40	0.455323	0.45	5.59731e-139
0.01	0.01	1	0.25	0.9	0.225	2	-2.41296	-2.38164	0.038	0.044	0.99979	-0.0125839	1.26213e-65	0.779712	0.775	7.6978e-138	0.99979	-0.00624738	1.26213e-65	0.387094	0.3875	7.6978e-138	0.999667	-0.00619126	4.95351e-62	0.341234	0.3375	2.0749e-130
0.01	0.02	2	0.25	0.9	0.225	2	-0.0120378	-0.0119946	0.048	0.056	0.999154	0.000102872	0.799252	0.773474	0.775	1.86466e-115	0.999154	3.362e-05	0.799252	0.252781	0.258333	1.86466e-115	0.998699	-0.000314713	0.0332209	0.224349	0.225	1.55377e-108
0.01	0.05	5	0.25	0.9	0.225	2	0.291655	0.29258	0.103	0.126	0.994527	0.00722459	1.46993e-09	0.787241	0.775	1.91331e-85	0.994527	0.00118529	1.46993e-09	0.129157	0.129167	1.91331e-85	0.996436	0.00118002	4.32135e-15	0.111905	0.1125	2.44182e-92
0.1	0.02	0.2	0.25	0.9	0.225	2	-0.261152	-0.260563	0.003	0.004	0.999991	-0.000147006	0.00042714	0.730043	0.775	5.96302e-188	0.999991	-0.000116985	0.00042714	0.580958	0.645833	5.96302e-188	0.999932	-0.000544436	1.24026e-09	0.532003	0.5625	4.85263e-156
0.1	0.05	0.5	0.25	0.9	0.225	2	-1.63639	-1.62677	0.012	0.014	0.999948	-0.00286622	2.65942e-43	0.737126	0.775	2.58771e-160	0.999948	-0.00175361	2.65942e-43	0.450987	0.516667	2.58771e-160	0.999869	-0.00207866	1.59167e-37	0.40899	0.45	2.30711e-145
0.1	0.1	1	0.25	0.9	0.225	2	-2.18749	-2.17739	0.027	0.031	0.999888	-0.0077305	4.48991e-62	0.735238	0.775	5.53012e-148	0.999888	-0.00348543	4.48991e-62	0.331495	0.3875	5.53012e-148	0.999747	-0.0036986	2.15812e-54	0.299121	0.3375	7.37078e-135
0.1	0.2	2	0.25	0.9	0.225	2	0.117563	0.117453	0.031	0.036	0.999781	0.000861262	4.62043e-05	0.750629	0.775	3.55255e-137	0.999781	0.000252271	4.62043e-05	0.219866	0.258333	3.55255e-137	0.999335	0.000138972	0.131582	0.197225	0.225	2.59533e-119
0.1	0.5	5	0.25	0.9	0.225	2	0.670235	0.671698	0.057	0.068	0.997947	0.011377	1.17309e-29	0.751809	0.775	3.31708e-101	0.997947	0.00160.00052	1.17309e-29	0.109035	0.129167	3.31708e-101	0.996706	0.00174912	6.37428e-29	0.0937491	0.1125	1.32985e-93
0.001	0.0002	0.2	0.5	0.9	0.45	2	-1.30884	-1.30609	0.008	0.009	0.999976	-0.00118026	3.69701e-37	0.549882	0.55	1.18031e-172	0.999976	-0.000982273	3.69701e-37	0.457641	0.458333	1.18031e-172	0.999853	-0.00134759	1.56675e-25	0.391303	0.375	1.32491e-143
0.001	0.0005	0.5	0.5	0.9	0.45	2	-0.495992	-0.49468	0.017	0.021	0.999861	-0.00122895	1.92223e-16	0.550686	0.55	1.75171e-144	0.999861	-0.000817276	1.92223e-16	0.366217	0.366667	1.75171e-144	0.999831	-0.00102783	7.69947e-23	0.310459	0.3	2.59712e-141
0.001	0.001	1	0.5	0.9	0.45	2	0.691081	0.684284	0.027	0.033	0.999719	0.00403404	9.58997e-38	0.538456	0.55	3.84622e-133	0.999719	0.0020318	9.58997e-38	0.271201	0.275	3.84622e-133	0.999278	0.00191317	7.01749e-28	0.228165	0.225	5.53634e-118
0.001	0.002	2	0.5	0.9	0.45	2	-1.04602	-1.04317	0.098	0.123	0.998436	-0.0132505	1.58831e-46	0.556758	0.55	1.42966e-105	0.998436	-0.00443057	1.58831e-46	0.186164	0.183333	1.42966e-105	0.99713	-0.00454734	4.76976e-44	0.153097	0.15	8.07559e-96
0.001	0.005	5	0.5	0.9	0.45	2	1.77552	1.76998	0.089	0.11	0.989988	0.0502662	3.48616e-62	0.500686	0.55	9.71369e-76	0.989988	0.00873302	3.48616e-62	0.0869868	0.0916667	9.71369e-76	0.982137	0.0089998	6.29489e-60	0.0718374	0.075	1.95664e-66
0.01	0.002	0.2	0.5	0.9	0.45	2	-0.633814	-0.633488	0.006	0.007	0.999987	-0.000554062	8.25882e-26	0.542408	0.55	5.11374e-183	0.999987	-0.000459011	8.25882e-26	0.449357	0.458333	5.11374e-183	0.999837	-0.000832745	1.77739e-14	0.382098	0.375	7.2773e-142
0.01	0.005	0.5	0.5	0.9	0.45	2	-0.507931	-0.505701	0.016	0.02	0.999854	-0.00114676	8.16092e-15	0.545643	0.55	1.23631e-143	0.999854	-0.000754993	8.16092e-15	0.359235	0.366667	1.23631e-143	0.99973	-0.00104458	1.51752e-18	0.30287	0.3	7.92089e-134
0.01	0.01	1	0.5	0.9	0.45	2	0.897824	0.890261	0.023	0.028	0.999472	0.00472128	1.76001e-33	0.534621	0.55	5.16603e-123	0.999472	0.00234117	1.76001e-33	0.265106	0.275	5.16603e-123	0.999219	0.00220409	6.87275e-31	0.225613	0.225	9.94653e-117
0.01	0.02	2	0.5	0.9	0.45	2	-1.11744	-1.11528	0.091	0.115	0.998115	-0.013371	1.0385e-43	0.561978	0.55	1.4359e-102	0.998115	-0.00439878	1.0385e-43	0.184879	0.183333	1.4359e-102	0.998742	-0.00428234	2.14771e-55	0.150261	0.15	4.44264e-109
0.01	0.05	5	0.5	0.9	0.45	2	1.62748	1.62342	0.083	0.1	0.98794	0.0400445	1.79258e-52	0.495991	0.55	9.52142e-73	0.98794	0.00675189	1.79258e-52	0.083629	0.0916667	9.52142e-73	0.989954	0.00668376	1.06722e-61	0.0674979	0.075	1.10107e-75
0.1	0.02	0.2	0.5	0.9	0.45	2	-1.35372	-1.35303	0.006	0.008	0.99998	-0.000824863	1.12096e-32	0.489378	0.55	2.69183e-175	0.99998	-0.000657348	1.12096e-32	0.389994	0.458333	2.69183e-175	0.999901	-0.000962399	8.7463e-26	0.336648	0.375	6.50738e-150
0.1	0.05	0.5	0.5	0.9	0.45	2	-0.0597274	-0.0596448	0.011	0.014	0.9999	-0.000128594	0.152008	0.495996	0.55	9.20258e-150	0.9999	-7.89484e-05	0.152008	0.304509	0.366667	9.20258e-150	0.999881	-0.000257828	2.55615e-06	0.259267	0.3	5.09452e-147
0.1	0.1	1	0.5	0.9	0.45	2	1.19736	1.19501	0.015	0.018	0.999607	0.00428629	2.42567e-37	0.490969	0.55	8.92506e-128	0.999607	0.0019308	2.42567e-37	0.221161	0.275	8.92506e-128	0.999445	0.00173689	7.61581e-34	0.189459	0.225	3.11835e-122
0.1	0.2	2	0.5	0.9	0.45	2	-1.00248	-1.00109	0.064	0.079	0.999362	-0.00789207	3.8983e-47	0.509146	0.55	5.51023e-120	0.999362	-0.00232219	3.8983e-47	0.149813	0.183333	5.51023e-120	0.998567	-0.00233157	1.59624e-40	0.12523	0.15	5.58803e-107
0.1	0.5	5	0.5	0.9	0.45	2	1.37516	1.37555	0.058	0.072	0.996209	0.0196171	5.91959e-49	0.488163	0.55	2.40555e-91	0.996209	0.00289729	5.91959e-49	0.0720977	0.0916667	2.40555e-91	0.993434	0.00292827	1.38876e-46	0.0597905	0.075	1.60721e-82
0.001	0.0002	0.2	0.75	0.9	0.675	2	-0.435364	-0.434315	0.01	0.014	0.999934	-0.000397147	2.26191e-12	0.325057	0.325	1.86017e-156	0.999934	-0.000331218	2.26191e-12	0.271095	0.270833	1.86017e-156	0.99981	-0.000475736	4.27061e-15	0.195738	0.1875	1.85536e-139
0.001	0.0005	0.5	0.75	0.9	0.675	2	0.578529	0.570347	0.021	0.031	0.999761	0.00146045	2.84513e-26	0.322681	0.325	8.98924e-136	0.999761	0.000972754	2.84513e-26	0.214926	0.216667	8.98924e-136	0.999194	0.000935236	1.67806e-19	0.149954	0.15	3.09091e-116
0.001	0.001	1	0.75	0.9	0.675	2	-0.226591	-0.223619	0.062	0.093	0.998977	-0.00122759	1.23836e-08	0.334451	0.325	2.10953e-112	0.998977	-0.000609469	1.23836e-08	0.166046	0.1625	2.10953e-112	0.995893	-0.000686494	1.45351e-06	0.113869	0.1125	4.6341e-90
0.001	0.002	2	0.75	0.9	0.675	2	-0.447553	-0.442778	0.151	0.196	0.994894	-0.00607469	1.36387e-23	0.322835	0.325	1.46085e-86	0.994894	-0.0020291	1.36387e-23	0.107835	0.108333	1.46085e-86	0.990103	-0.00203822	1.93238e-21	0.0850707	0.075	6.33184e-76
0.001	0.005	5	0.75	0.9	0.675	2	0.43097	0.426069	0.285	0.501	0.982445	0.0142211	5.97329e-31	0.303803	0.325	1.02809e-66	0.982445	0.00247859	5.97329e-31	0.0529495	0.0541667	1.02809e-66	0.917146	0.00248561	7.63218e-26	0.0287245	0.0375	9.15593e-42
0.01	0.002	0.2	0.75	0.9	0.675	2	-0.170163	-0.16964	0.009	0.012	0.999964	-9.23626e-05	0.00893066	0.318429	0.325	5.07314e-166	0.999964	-7.66198e-05	0.00893066	0.264154	0.270833	5.07314e-166	0.9996	-0.000379079	4.83312e-07	0.191776	0.1875	1.72881e-127
0.01	0.005	0.5	0.75	0.9	0.675	2	0.873287	0.863382	0.017	0.026	0.999711	0.00196592	5.66014e-32	0.318252	0.325	9.78225e-133	0.999711	0.00129835	5.66014e-32	0.210183	0.216667	9.78225e-133	0.999301	0.00119919	3.21889e-27	0.149149	0.15	1.65459e-118
0.01	0.01	1	0.75	0.9	0.675	2	-0.282138	-0.279033	0.058	0.087	0.998612	-0.00146184	2.94197e-09	0.324544	0.325	1.73625e-107	0.998612	-0.000716093	2.94197e-09	0.15898	0.1625	1.73625e-107	0.997837	-0.000778075	4.2489e-12	0.113012	0.1125	2.29891e-100
0.01	0.02	2	0.75	0.9	0.675	2	-0.55764	-0.55188	0.143	0.189	0.993682	-0.0066861	1.85949e-23	0.321024	0.325	3.87615e-83	0.993682	-0.00219197	1.85949e-23	0.105245	0.108333	3.87615e-83	0.994515	-0.00224153	1.22509e-32	0.0810125	0.075	2.07564e-85
0.01	0.05	5	0.75	0.9	0.675	2	0.558154	0.554136	0.238	0.445	0.977815	0.0149988	3.53583e-28	0.315682	0.325	5.95593e-63	0.977815	0.00254984	3.53583e-28	0.0536667	0.0541667	5.95593e-63	0.935003	0.00267413	3.10422e-31	0.0286599	0.0375	1.14051e-45
0.1	0.02	0.2	0.75	0.9	0.675	2	-0.168699	-0.168577	0.008	0.011	0.99996	-8.95397e-05	0.00507816	0.2746	0.325	1.34994e-164	0.99996	-7.14377e-05	0.00507816	0.219085	0.270833	1.34994e-164	0.99982	-0.000226074	1.1443e-07	0.160364	0.1875	2.40455e-140
0.1	0.05	0.5	0.75	0.9	0.675	2	0.887252	0.883838	0.015	0.021	0.999757	0.00159289	2.09982e-32	0.276547	0.325	1.72877e-135	0.999757	0.000980685	2.09982e-32	0.17026	0.216667	1.72877e-135	0.999391	0.000864207	1.67927e-25	0.123267	0.15	9.99092e-121
0.1	0.1	1	0.75	0.9	0.675	2	-0.3786	-0.377377	0.047	0.069	0.999243	-0.00153073	1.08801e-16	0.290029	0.325	3.10038e-117	0.999243	-0.000682387	1.08801e-16	0.129293	0.1625	3.10038e-117	0.998125	-0.000635695	1.316e-13	0.0904469	0.1125	1.158e-102
0.1	0.2	2	0.75	0.9	0.675	2	-0.579894	-0.576658	0.104	0.142	0.995489	-0.00440286	1.41288e-20	0.283567	0.325	1.496e-88	0.995489	-0.00129038	1.41288e-20	0.0831069	0.108333	1.496e-88	0.995193	-0.00131331	6.62605e-27	0.0629359	0.075	1.57734e-87
0.1	0.5	5	0.75	0.9	0.675	2	0.72219	0.721287	0.145	0.255	0.990106	0.0119214	1.09681e-37	0.267556	0.325	6.26344e-76	0.990106	0.00178232	1.09681e-37	0.0400013	0.0541667	6.26344e-76	0.958894	0.00166353	1.50357e-27	0.0260975	0.0375	4.88839e-53
0.001	0.0002	0.2	0.25	0.1	0.025	3	-0.370247	-0.311254	0.001	0.007	0.999987	-1.51615e-05	0.812172	0.975956	0.975	2.87265e-182	0.999987	-1.26436e-05	0.812172	0.813877	0.8125	2.87265e-182	0.983729	-0.00102685	9.04623e-06	0.093459	0.0625	6.19678e-68
0.001	0.0005	0.5	0.25	0.1	0.025	3	0.494732	0.470633	0.004	0.049	0.999942	0.000391625	0.00433342	0.979833	0.975	1.15547e-158	0.999942	0.000261084	0.00433342	0.653223	0.65	1.15547e-158	0.98697	-0.00019994	0.154664	0.0675585	0.05	1.66437e-71
0.001	0.001	1	0.25	0.1	0.025	3	-1.4657	-1.4291	0.018	0.265	0.999867	-0.00566937	1.00847e-40	0.992981	0.975	3.64578e-145	0.999867	-0.00281268	1.00847e-40	0.492636	0.4875	3.64578e-145	0.980535	-0.0030403	3.43372e-38	0.0475723	0.0375	4.70103e-65
0.001	0.002	2	0.25	0.1	0.025	3	-0.240487	-0.238276	0.036	0.501	0.999308	-0.00263613	3.90615e-07	1.00412	0.975	1.11507e-118	0.999308	-0.000870464	3.90615e-07	0.331567	0.325	1.11507e-118	0.873975	-0.000990754	2.75731e-06	0.0286834	0.025	5.14251e-35
0.001	0.005	5	0.25	0.1	0.025	3	1.10489	1.10988	0.065	0.501	0.997139	0.0326747	1.46071e-46	1.01337	0.975	7.15992e-96	0.997139	0.00540561	1.46071e-46	0.167649	0.1625	7.15992e-96	0.323604	0.00528735	2.32408e-41	0.00723213	0.0125	8.26155e-08
0.01	0.002	0.2	0.25	0.1	0.025	3	0.187315	0.180794	0.001	0.007	0.999996	9.72278e-06	0.788226	0.97567	0.975	1.77017e-200	0.999996	8.067e-06	0.788226	0.809515	0.8125	1.77017e-200	0.98335	-0.000988803	3.08447e-05	0.0955355	0.0625	1.45231e-67
0.01	0.005	0.5	0.25	0.1	0.025	3	0.125159	0.120791	0.004	0.051	0.999965	0.000181273	0.0862301	0.977978	0.975	1.92945e-166	0.999965	0.000119633	0.0862301	0.64543	0.65	1.92945e-166	0.987091	-0.000522045	0.000417779	0.0689567	0.05	1.18072e-71
0.01	0.01	1	0.25	0.1	0.025	3	-1.24405	-1.21943	0.016	0.231	0.99991	-0.0045011	5.80517e-40	0.985099	0.975	1.72721e-151	0.99991	-0.00220252	5.80517e-40	0.482038	0.4875	1.72721e-151	0.974649	-0.00252059	9.45601e-29	0.0484735	0.0375	8.3036e-61
0.01	0.02	2	0.25	0.1	0.025	3	-0.421346	-0.418179	0.034	0.501	0.999322	-0.00358975	3.14018e-11	0.986642	0.975	5.34438e-119	0.999322	-0.00116589	3.14018e-11	0.320445	0.325	5.34438e-119	0.948413	-0.00146411	5.15469e-22	0.0255515	0.025	2.19236e-49
0.01	0.05	5	0.25	0.1	0.025	3	1.10603	1.10781	0.055	0.501	0.997307	0.0282121	1.51879e-43	0.997212	0.975	7.71648e-97	0.997307	0.00455417	1.51879e-43	0.160976	0.1625	7.71648e-97	0.306724	0.00466123	5.31356e-44	0.00560874	0.0125	2.10818e-07
0.1	0.02	0.2	0.25	0.1	0.025	3	0.506303	0.503737	0.001	0.005	0.999994	7.62314e-05	0.0796175	0.968701	0.975	1.11793e-194	0.999994	6.08215e-05	0.0796175	0.772882	0.8125	1.11793e-194	0.986974	-0.00099109	1.50149e-05	0.103915	0.0625	1.64562e-71
0.1	0.05	0.5	0.25	0.1	0.025	3	-0.0499385	-0.0494386	0.003	0.036	0.999969	-8.46062e-05	0.388801	0.973942	0.975	1.98739e-168	0.999969	-5.20071e-05	0.388801	0.598678	0.65	1.98739e-168	0.991355	-0.000539153	3.05566e-05	0.0725434	0.05	4.25198e-78
0.1	0.1	1	0.25	0.1	0.025	3	-1.60013	-1.59263	0.012	0.155	0.999906	-0.00372986	4.04578e-34	0.980824	0.975	8.03716e-151	0.999906	-0.00166236	4.04578e-34	0.437144	0.4875	8.03716e-151	0.99076	-0.00186967	4.01189e-35	0.047528	0.0375	4.98817e-77
0.1	0.2	2	0.25	0.1	0.025	3	-0.47099	-0.469059	0.023	0.318	0.99973	-0.00293241	1.87482e-15	0.991564	0.975	8.98834e-134	0.99973	-0.000853987	1.87482e-15	0.288767	0.325	8.98834e-134	0.9744	-0.000946976	3.2772e-18	0.0282624	0.025	1.19227e-60
0.1	0.5	5	0.25	0.1	0.025	3	1.16924	1.16766	0.032	0.501	0.999119	0.0181466	2.42958e-47	0.989458	0.975	8.41185e-115	0.999119	0.00260455	2.42958e-47	0.142015	0.1625	8.41185e-115	0.879064	0.0025611	1.45168e-43	0.0126753	0.0125	1.11601e-35
0.001	0.0002	0.2	0.5	0.1	0.05	3	0.155882	0.135192	0.001	0.012	0.999988	-1.05891e-05	0.860954	0.949944	0.95	3.94183e-183	0.999988	-8.81946e-06	0.860954	0.791191	0.791667	3.94183e-183	0.98336	-0.000599596	4.33868e-05	0.0591962	0.0416667	1.4208e-67
0.001	0.0005	0.5	0.5	0.1	0.05	3	1.34226	1.28248	0.003	0.061	0.999956	0.00150736	2.99439e-21	0.954746	0.95	6.64025e-163	0.999956	0.00100374	2.99439e-21	0.635756	0.633333	6.64025e-163	0.977688	0.000599982	5.46202e-06	0.0452361	0.0333333	7.35747e-63
0.001	0.001	1	0.5	0.1	0.05	3	0.352797	0.344368	0.012	0.281	0.999846	0.00146237	2.14249e-09	0.963154	0.95	9.10745e-143	0.999846	0.00072443	2.14249e-09	0.477129	0.475	9.10745e-143	0.964792	0.000459294	6.95422e-05	0.0318382	0.025	1.58198e-55
0.001	0.002	2	0.5	0.1	0.05	3	-1.82152	-1.78369	0.056	0.501	0.999222	-0.0185451	2.8928e-50	0.977449	0.95	8.50413e-117	0.999222	-0.00611244	2.8928e-50	0.322166	0.316667	8.50413e-117	0.812249	-0.00650844	6.9237e-52	0.0188826	0.0166667	1.35586e-28
0.001	0.005	5	0.5	0.1	0.05	3	1.13543	1.13406	0.064	0.501	0.995957	0.0326716	7.98209e-44	0.933093	0.95	2.61168e-90	0.995957	0.00562972	7.98209e-44	0.160784	0.158333	2.61168e-90	0.00586125	0.00564608	4.71573e-34	-0.0011057	0.00833333	0.51097
0.01	0.002	0.2	0.5	0.1	0.05	3	0.206072	0.198009	0.001	0.012	0.999993	-3.5241e-06	0.937116	0.947934	0.95	8.72732e-193	0.999993	-2.921e-06	0.937116	0.785708	0.791667	8.72732e-193	0.985409	-0.00063951	6.48349e-06	0.0604097	0.0416667	1.0981e-69
0.01	0.005	0.5	0.5	0.1	0.05	3	1.34559	1.29804	0.003	0.056	0.999974	0.00145468	1.05651e-26	0.951368	0.95	3.43474e-171	0.999974	0.00095946	1.05651e-26	0.62749	0.633333	3.43474e-171	0.978752	0.000510125	6.3276e-05	0.0455625	0.0333333	1.20492e-63
0.01	0.01	1	0.5	0.1	0.05	3	0.498868	0.489386	0.01	0.247	0.999767	0.00176335	3.13912e-09	0.958141	0.95	3.67725e-136	0.999767	0.000863251	3.13912e-09	0.46906	0.475	3.67725e-136	0.967138	0.000689875	2.65958e-08	0.0335762	0.025	1.23159e-56
0.01	0.02	2	0.5	0.1	0.05	3	-1.92022	-1.88513	0.051	0.501	0.999161	-0.0186118	4.96002e-49	0.983348	0.95	1.41248e-115	0.999161	-0.00602657	4.96002e-49	0.318411	0.316667	1.41248e-115	0.857033	-0.0060259	5.16056e-52	0.0204942	0.0166667	5.52257e-33
0.01	0.05	5	0.5	0.1	0.05	3	1.14952	1.15063	0.054	0.501	0.995673	0.0279232	1.27133e-37	0.952391	0.95	3.2137e-89	0.995673	0.00466797	1.27133e-37	0.159213	0.158333	3.2137e-89	0.0471955	0.00463967	3.02947e-33	-0.00271133	0.00833333	0.0594172
0.1	0.02	0.2	0.5	0.1	0.05	3	-0.792271	-0.784607	0.001	0.012	0.999996	-4.70093e-05	0.185956	0.936309	0.95	6.33916e-200	0.999996	-3.74779e-05	0.185956	0.746466	0.791667	6.33916e-200	0.984352	-0.000768713	2.80121e-06	0.0670818	0.0416667	1.4583e-68
0.1	0.05	0.5	0.5	0.1	0.05	3	1.09127	1.08166	0.002	0.043	0.999966	0.000840736	1.17571e-12	0.945684	0.95	3.03961e-167	0.999966	0.00051632	1.17571e-12	0.580771	0.633333	3.03961e-167	0.985263	0.000162161	0.123511	0.0475127	0.0333333	1.58395e-69
0.1	0.1	1	0.5	0.1	0.05	3	0.380442	0.378261	0.008	0.16	0.999864	0.000950396	7.92521e-06	0.948324	0.95	7.26124e-145	0.999864	0.000424428	7.92521e-06	0.423503	0.475	7.26124e-145	0.969034	0.000263591	0.0200954	0.0346473	0.025	1.36519e-57
0.1	0.2	2	0.5	0.1	0.05	3	-1.81556	-1.80025	0.033	0.501	0.999664	-0.0107339	6.11347e-47	0.961196	0.95	2.60502e-130	0.999664	-0.00310863	6.11347e-47	0.278371	0.316667	2.60502e-130	0.889005	-0.00336504	6.37889e-39	0.0204713	0.0166667	4.64492e-37
0.1	0.5	5	0.5	0.1	0.05	3	1.35145	1.3539	0.029	0.501	0.99899	0.019201	1.62182e-48	0.940437	0.95	1.33673e-112	0.99899	0.00281245	1.62182e-48	0.13775	0.158333	1.33673e-112	0.150258	0.00300632	1.92242e-43	0.00233019	0.00833333	0.000540975
0.001	0.0002	0.2	0.75	0.1	0.075	3	-0.743454	-0.641386	0.001	0.039	0.999987	-0.000131631	0.0289824	0.924264	0.925	7.29148e-183	0.999987	-0.000109684	0.0289824	0.770163	0.770833	7.29148e-183	0.980904	-0.000395702	1.58753e-06	0.030337	0.0208333	2.31778e-65
0.001	0.0005	0.5	0.75	0.1	0.075	3	1.52486	1.45899	0.003	0.13	0.999957	0.00181346	9.28447e-27	0.926394	0.925	2.53701e-163	0.999957	0.00120179	9.28447e-27	0.61393	0.616667	2.53701e-163	0.924605	0.00095642	2.02263e-11	0.0236756	0.0166667	2.78041e-43
0.001	0.001	1	0.75	0.1	0.075	3	-0.446038	-0.433602	0.014	0.501	0.99989	-0.001665	3.50129e-14	0.945589	0.925	3.48196e-148	0.99989	-0.000823939	3.50129e-14	0.467934	0.4625	3.48196e-148	0.893495	-0.000894607	1.87333e-11	0.0182755	0.0125	1.00552e-37
0.001	0.002	2	0.75	0.1	0.075	3	-2.03256	-1.99724	0.061	0.501	0.999373	-0.0217897	1.03341e-59	0.942617	0.925	2.98568e-120	0.999373	-0.00725765	1.03341e-59	0.313964	0.308333	2.98568e-120	0.754391	-0.00727986	3.07964e-53	0.017032	0.00833333	2.91248e-24
0.001	0.005	5	0.75	0.1	0.075	3	0.597408	0.59984	0.085	0.501	0.996548	0.0178934	1.39025e-29	0.913649	0.925	7.50559e-93	0.996548	0.00313608	1.39025e-29	0.160131	0.154167	7.50559e-93	0.0741814	0.00298246	8.37367e-25	0.00305775	0.00416667	0.0173014
0.01	0.002	0.2	0.75	0.1	0.075	3	-0.0161453	-0.0156861	0.001	0.031	0.999995	9.59701e-06	0.793878	0.921893	0.925	3.48292e-198	0.999995	7.95691e-06	0.793878	0.764345	0.770833	3.48292e-198	0.983084	-0.00028727	0.000177635	0.0309633	0.0208333	2.60825e-67
0.01	0.005	0.5	0.75	0.1	0.075	3	1.47035	1.43528	0.003	0.116	0.999969	0.0016852	3.99139e-29	0.924391	0.925	1.52549e-168	0.999969	0.00110662	3.99139e-29	0.607021	0.616667	1.52549e-168	0.974195	0.000779972	9.93277e-16	0.0262658	0.0166667	1.60064e-60
0.01	0.01	1	0.75	0.1	0.075	3	-0.250713	-0.24333	0.013	0.501	0.999793	-0.00070469	0.00468267	0.937975	0.925	4.34766e-138	0.999793	-0.00034451	0.00468267	0.45856	0.4625	4.34766e-138	0.916707	-0.000567017	3.81764e-07	0.0188344	0.0125	1.11385e-41
0.01	0.02	2	0.75	0.1	0.075	3	-2.31367	-2.28078	0.058	0.501	0.999447	-0.0222005	1.33429e-62	0.932758	0.925	2.83611e-122	0.999447	-0.00726884	1.33429e-62	0.305402	0.308333	2.83611e-122	0.860967	-0.00724652	4.90042e-63	0.0175801	0.00833333	1.96246e-33
0.01	0.05	5	0.75	0.1	0.075	3	0.630243	0.633223	0.072	0.501	0.995084	0.0165379	5.07034e-23	0.917379	0.925	3.6151e-87	0.995084	0.00281239	5.07034e-23	0.156007	0.154167	3.6151e-87	0.0518541	0.00277699	2.03901e-26	-0.00220499	0.00416667	0.0478896
0.1	0.02	0.2	0.75	0.1	0.075	3	-0.880837	-0.874467	0.001	0.03	0.999994	-0.000135978	0.000699639	0.906519	0.925	4.47975e-196	0.999994	-0.000108441	0.000699639	0.722938	0.770833	4.47975e-196	0.985923	-0.000417467	2.70371e-07	0.034455	0.0208333	2.90992e-70
0.1	0.05	0.5	0.75	0.1	0.075	3	1.23016	1.2265	0.002	0.099	0.999958	0.00108687	8.59205e-16	0.910897	0.925	1.61756e-163	0.999958	0.000665106	8.59205e-16	0.557421	0.616667	1.61756e-163	0.978034	0.000393408	7.83479e-08	0.0245767	0.0166667	4.12652e-63
0.1	0.1	1	0.75	0.1	0.075	3	-0.418808	-0.414827	0.01	0.461	0.99987	-0.000733348	0.000197665	0.91823	0.925	1.3259e-145	0.99987	-0.000327161	0.000197665	0.40964	0.4625	1.3259e-145	0.916594	-0.000605005	3.1815e-08	0.0181181	0.0125	1.17098e-41
0.1	0.2	2	0.75	0.1	0.075	3	-2.54006	-2.52555	0.039	0.501	0.999783	-0.0149602	1.91167e-65	0.916552	0.925	2.70619e-137	0.999783	-0.00438015	1.91167e-65	0.268355	0.308333	2.70619e-137	0.925241	-0.00460176	1.36972e-63	0.0155071	0.00833333	2.0318e-43
0.1	0.5	5	0.75	0.1	0.075	3	1.05807	1.05979	0.036	0.501	0.998645	0.0157046	1.2634e-38	0.925924	0.925	7.03758e-108	0.998645	0.00232222	1.2634e-38	0.136915	0.154167	7.03758e-108	0.0920436	0.00232589	1.0119e-33	0.00191137	0.00416667	0.00771857
0.001	0.0002	0.2	0.25	0.5	0.125	3	-0.0829973	-0.0819705	0.002	0.003	0.999994	-3.76389e-06	0.92228	0.872999	0.875	7.54695e-195	0.999994	-3.13615e-06	0.92228	0.727401	0.729167	7.54695e-195	0.996076	-0.002197	2.10301e-06	0.379621	0.3125	8.63235e-91
0.001	0.0005	0.5	0.25	0.5	0.125	3	-0.0964767	-0.0956628	0.007	0.015	0.999947	-1.59159e-05	0.88995	0.877107	0.875	6.82013e-160	0.999947	-1.06112e-05	0.88995	0.584769	0.583333	6.82013e-160	0.997087	-0.00146479	2.39969e-06	0.295875	0.25	1.39716e-95
0.001	0.001	1	0.25	0.5	0.125	3	-0.847471	-0.842138	0.022	0.051	0.999857	-0.00419592	1.35035e-34	0.877787	0.875	5.10264e-144	0.999857	-0.00209067	1.35035e-34	0.437368	0.4375	5.10264e-144	0.997375	-0.00275226	2.89761e-22	0.216016	0.1875	2.98398e-97
0.001	0.002	2	0.25	0.5	0.125	3	0.333195	0.332799	0.037	0.088	0.999222	0.00368732	1.91846e-12	0.874483	0.875	8.38513e-117	0.999222	0.00122564	1.91846e-12	0.290672	0.291667	8.38513e-117	0.99491	0.000750082	7.60396e-05	0.139698	0.125	1.30524e-86
0.001	0.005	5	0.25	0.5	0.125	3	1.78114	1.76777	0.053	0.159	0.99184	0.0522745	1.12105e-52	0.783498	0.875	5.01208e-79	0.99184	0.00853463	1.12105e-52	0.127918	0.145833	5.01208e-79	0.972778	0.00833037	3.42251e-60	0.053155	0.0625	1.1574e-59
0.01	0.002	0.2	0.25	0.5	0.125	3	-0.10912	-0.108312	0.002	0.003	0.999992	-4.02002e-06	0.9299	0.870238	0.875	2.63759e-189	0.999992	-3.33371e-06	0.9299	0.721668	0.729167	2.63759e-189	0.996329	-0.00211681	2.2286e-06	0.379308	0.3125	7.31485e-92
0.01	0.005	0.5	0.25	0.5	0.125	3	-0.0424392	-0.0421171	0.006	0.013	0.999948	-0.000126476	0.264449	0.874399	0.875	2.10451e-160	0.999948	-8.34909e-05	0.264449	0.577222	0.583333	2.10451e-160	0.997793	-0.00128388	1.83201e-06	0.294042	0.25	4.89566e-100
0.01	0.01	1	0.25	0.5	0.125	3	-0.845032	-0.841337	0.021	0.047	0.999797	-0.00364824	2.63035e-26	0.873871	0.875	2.06619e-138	0.999797	-0.00179573	2.63035e-26	0.430134	0.4375	2.06619e-138	0.998683	-0.00228665	1.78844e-26	0.213296	0.1875	2.47545e-108
0.01	0.02	2	0.25	0.5	0.125	3	0.186003	0.18549	0.035	0.082	0.999074	0.00196299	9.30199e-05	0.870869	0.875	5.32576e-114	0.999074	0.000640988	9.30199e-05	0.28437	0.291667	5.32576e-114	0.99714	0.000318234	0.017221	0.13614	0.125	7.07655e-96
0.01	0.05	5	0.25	0.5	0.125	3	1.71933	1.71005	0.047	0.135	0.995378	0.0421569	4.26955e-53	0.829712	0.875	3.66752e-88	0.995378	0.00677412	4.26955e-53	0.133325	0.145833	3.66752e-88	0.968449	0.00684329	2.08111e-52	0.0519941	0.0625	2.73081e-57
0.1	0.02	0.2	0.25	0.5	0.125	3	-0.84343	-0.8412	0.002	0.003	0.999989	-0.000232949	1.12299e-05	0.84579	0.875	9.4206e-186	0.999989	-0.000185716	1.12299e-05	0.674296	0.729167	9.4206e-186	0.997198	-0.00197785	4.55808e-07	0.37658	0.3125	3.31767e-96
0.1	0.05	0.5	0.25	0.5	0.125	3	-0.137544	-0.13717	0.005	0.01	0.999953	-0.00017564	0.0967989	0.849218	0.875	7.5235e-162	0.999953	-0.000108048	0.0967989	0.522409	0.583333	7.5235e-162	0.998363	-0.00113502	4.36749e-07	0.282369	0.25	7.63366e-105
0.1	0.1	1	0.25	0.5	0.125	3	-0.772076	-0.771126	0.015	0.03	0.999853	-0.00235813	2.77076e-20	0.853499	0.875	1.5405e-143	0.999853	-0.00105675	2.77076e-20	0.382479	0.4375	1.5405e-143	0.997981	-0.00164012	1.29261e-15	0.201084	0.1875	1.79232e-101
0.1	0.2	2	0.25	0.5	0.125	3	0.387426	0.386549	0.023	0.049	0.999617	0.00266182	2.59131e-13	0.853363	0.875	3.44726e-128	0.999617	0.000778602	2.59131e-13	0.249614	0.291667	3.44726e-128	0.997939	0.000570363	3.63406e-07	0.125406	0.125	3.82876e-101
0.1	0.5	5	0.25	0.5	0.125	3	1.438	1.43344	0.033	0.083	0.998323	0.0218569	1.25471e-48	0.827346	0.875	1.90047e-104	0.998323	0.00314333	1.25471e-48	0.118984	0.145833	1.90047e-104	0.98964	0.00304506	1.41526e-44	0.0528132	0.0625	3.44279e-75
0.001	0.0002	0.2	0.5	0.5	0.25	3	-0.44692	-0.435987	0.002	0.005	0.999983	-0.000116665	0.0393845	0.750616	0.75	3.99854e-178	0.999983	-9.72243e-05	0.0393845	0.625534	0.625	3.99854e-178	0.99608	-0.00153455	7.38276e-07	0.252358	0.208333	8.25855e-91
0.001	0.0005	0.5	0.5	0.5	0.25	3	1.33202	1.32128	0.005	0.014	0.99993	0.00224692	1.34217e-31	0.749962	0.75	1.52025e-155	0.99993	0.00149705	1.34217e-31	0.499677	0.5	1.52025e-155	0.997111	0.000694405	0.000428908	0.195277	0.166667	1.03924e-95
0.001	0.001	1	0.5	0.5	0.25	3	0.442423	0.442642	0.018	0.055	0.999553	0.0020257	9.2034e-10	0.762205	0.75	1.07319e-125	0.999553	0.00100595	9.2034e-10	0.378505	0.375	1.07319e-125	0.996442	0.000580999	0.000249455	0.141009	0.125	2.30312e-92
0.001	0.002	2	0.5	0.5	0.25	3	-0.342765	-0.339638	0.059	0.181	0.99916	-0.00455511	3.12379e-18	0.759292	0.75	1.44949e-115	0.99916	-0.00148186	3.12379e-18	0.247012	0.25	1.44949e-115	0.99264	-0.00173538	6.90339e-20	0.0901371	0.0833333	1.10182e-80
0.001	0.005	5	0.5	0.5	0.25	3	0.0206382	0.0206607	0.134	0.444	0.991658	0.000430481	0.720195	0.728741	0.75	1.13152e-78	0.991658	7.22318e-05	0.720195	0.122278	0.125	1.13152e-78	0.942494	2.57707e-05	0.882327	0.0392132	0.0416667	1.2236e-47
0.01	0.002	0.2	0.5	0.5	0.25	3	-0.508565	-0.501604	0.002	0.005	0.999994	-0.000108488	0.00154447	0.740.00052	0.75	1.13555e-194	0.999994	-8.99366e-05	0.00154447	0.617608	0.625	1.13555e-194	0.996391	-0.00147824	6.25494e-07	0.251459	0.208333	3.89114e-92
0.01	0.005	0.5	0.5	0.5	0.25	3	1.02542	1.01996	0.005	0.015	0.999951	0.00169641	4.43739e-29	0.74367	0.75	2.77678e-161	0.999951	0.00111929	4.43739e-29	0.490672	0.5	2.77678e-161	0.997601	0.000237781	0.170297	0.19548	0.166667	1.06777e-98
0.01	0.01	1	0.5	0.5	0.25	3	0.306671	0.307135	0.017	0.053	0.999807	0.00121654	9.8786e-09	0.756638	0.75	3.48197e-139	0.999807	0.000595524	9.8786e-09	0.370392	0.375	3.48197e-139	0.996624	0.000198473	0.179251	0.140407	0.125	3.28567e-93
0.01	0.02	2	0.5	0.5	0.25	3	-0.267579	-0.26555	0.053	0.16	0.999129	-0.00290233	2.11008e-10	0.745854	0.75	5.6065e-115	0.999129	-0.00093025	2.11008e-10	0.23906	0.25	5.6065e-115	0.993091	-0.00106565	5.03088e-12	0.0868017	0.0833333	1.05932e-81
0.01	0.05	5	0.5	0.5	0.25	3	-0.089034	-0.0890923	0.119	0.391	0.996671	-0.00245392	0.00156088	0.72159	0.75	1.96528e-93	0.996671	-0.000405781	0.00156088	0.119322	0.125	1.96528e-93	0.969271	-0.000278316	0.0251315	0.0381762	0.0416667	1.0272e-57
0.1	0.02	0.2	0.5	0.5	0.25	3	-0.0121823	-0.012147	0.002	0.003	0.999992	1.7674e-05	0.627549	0.702714	0.75	9.59244e-190	0.999992	1.40906e-05	0.627549	0.560241	0.625	9.59244e-190	0.997067	-0.0011833	3.4253e-06	0.242502	0.208333	1.81522e-95
0.1	0.05	0.5	0.5	0.5	0.25	3	0.843481	0.843117	0.005	0.012	0.999937	0.00106176	1.82261e-16	0.705059	0.75	3.67407e-157	0.999937	0.000652715	1.82261e-16	0.433435	0.5	3.67407e-157	0.998445	-2.60494e-05	0.840089	0.18196	0.166667	1.15936e-105
0.1	0.1	1	0.5	0.5	0.25	3	0.224194	0.22439	0.013	0.037	0.999859	0.00082909	6.80844e-07	0.717047	0.75	3.23315e-144	0.999859	0.000369624	6.80844e-07	0.319673	0.375	3.23315e-144	0.99734	-9.2672e-05	0.436526	0.128049	0.125	4.87634e-97
0.1	0.2	2	0.5	0.5	0.25	3	0.0805338	0.0802797	0.032	0.092	0.999432	0.000743304	0.015585	0.702972	0.75	7.62441e-122	0.999432	0.000215288	0.015585	0.203606	0.25	7.62441e-122	0.995927	-1.07287e-06	0.990644	0.0796016	0.0833333	3.40811e-90
0.1	0.5	5	0.5	0.5	0.25	3	-0.161399	-0.161168	0.075	0.233	0.996029	-0.00185455	0.0224303	0.703184	0.75	1.33381e-90	0.996029	-0.000272649	0.0224303	0.103379	0.125	1.33381e-90	0.983063	-0.000474814	1.35499e-06	0.0384005	0.0416667	2.73238e-67
0.001	0.0002	0.2	0.75	0.5	0.375	3	0.644418	0.628957	0.002	0.008	0.999979	0.000210208	9.93455e-05	0.624477	0.625	5.94725e-175	0.999979	0.000175267	9.93455e-05	0.520676	0.520833	5.94725e-175	0.996325	-0.000517035	0.000340978	0.126518	0.104167	7.5848e-92
0.001	0.0005	0.5	0.75	0.5	0.375	3	0.912124	0.901723	0.007	0.034	0.999883	0.00150053	8.44072e-20	0.623786	0.625	2.77112e-147	0.999883	0.001002	8.44072e-20	0.41654	0.416667	2.77112e-147	0.994192	0.000543732	7.34107e-05	0.0945417	0.0833333	1.72559e-84
0.001	0.001	1	0.75	0.5	0.375	3	0.570361	0.562837	0.02	0.101	0.999671	0.00259609	3.42683e-20	0.631544	0.625	1.22336e-130	0.999671	0.00129225	3.42683e-20	0.314361	0.3125	1.22336e-130	0.992398	0.00108086	4.27842e-14	0.0740296	0.0625	3.64952e-80
0.001	0.002	2	0.75	0.5	0.375	3	-0.461165	-0.455811	0.065	0.33	0.998537	-0.00521293	3.3274e-19	0.628628	0.625	1.19662e-106	0.998537	-0.00170012	3.3274e-19	0.205017	0.208333	1.19662e-106	0.97709	-0.0017604	3.12527e-21	0.0484154	0.0416667	1.95683e-62
0.001	0.005	5	0.75	0.5	0.375	3	0.879824	0.873238	0.119	0.501	0.991066	0.0275098	4.30994e-39	0.619175	0.625	1.43603e-77	0.991066	0.00469588	4.30994e-39	0.105692	0.104167	1.43603e-77	0.708431	0.00432949	1.24022e-41	0.0132226	0.0208333	1.71322e-21
0.01	0.002	0.2	0.75	0.5	0.375	3	-0.486007	-0.47993	0.002	0.01	0.999992	-0.000192816	6.24114e-08	0.618855	0.625	1.19209e-189	0.999992	-0.000159991	6.24114e-08	0.513501	0.520833	1.19209e-189	0.995861	-0.000811454	3.14264e-07	0.124945	0.104167	6.2095e-90
0.01	0.005	0.5	0.75	0.5	0.375	3	0.478617	0.473593	0.007	0.038	0.999939	0.000760951	3.16131e-13	0.616736	0.625	7.97486e-158	0.999939	0.000503158	3.16131e-13	0.407799	0.416667	7.97486e-158	0.995754	0.000164238	0.131717	0.0921156	0.0833333	1.59825e-89
0.01	0.01	1	0.75	0.5	0.375	3	0.654508	0.648412	0.018	0.092	0.999742	0.0027049	2.91173e-24	0.623866	0.625	1.50195e-134	0.999742	0.00132696	2.91173e-24	0.306054	0.3125	1.50195e-134	0.994727	0.00125153	3.62894e-21	0.072598	0.0625	4.81801e-86
0.01	0.02	2	0.75	0.5	0.375	3	-0.36446	-0.361001	0.058	0.295	0.99865	-0.0040072	5.75521e-15	0.622347	0.625	6.13256e-108	0.99865	-0.00128871	5.75521e-15	0.200147	0.208333	6.13256e-108	0.974784	-0.00121854	1.89144e-14	0.0445159	0.0416667	6.81068e-61
0.01	0.05	5	0.75	0.5	0.375	3	0.786423	0.78346	0.107	0.501	0.990359	0.0207027	1.69302e-30	0.609344	0.625	2.40004e-76	0.990359	0.0034417	1.69302e-30	0.1013	0.104167	2.40004e-76	0.693548	0.00338842	5.53479e-40	0.010565	0.0208333	1.09202e-20
0.1	0.02	0.2	0.75	0.5	0.375	3	-0.636127	-0.634587	0.002	0.008	0.999985	-0.000142419	0.000629	0.567644	0.625	7.6909e-180	0.999985	-0.000113635	0.000629	0.45292	0.520833	7.6909e-180	0.99714	-0.000673675	7.24978e-08	0.117397	0.104167	7.11956e-96
0.1	0.05	0.5	0.75	0.5	0.375	3	0.639965	0.638702	0.006	0.027	0.999946	0.000664222	3.82122e-13	0.570264	0.625	1.61753e-159	0.999946	0.000408919	3.82122e-13	0.351075	0.416667	1.61753e-159	0.99803	0.000167823	0.0150133	0.0846765	0.0833333	7.32048e-102
0.1	0.1	1	0.75	0.5	0.375	3	0.412047	0.410853	0.015	0.069	0.999799	0.00108588	1.97883e-10	0.580136	0.625	1.49376e-138	0.999799	0.000485615	1.97883e-10	0.259442	0.3125	1.49376e-138	0.995365	0.000300803	0.00032008	0.0651783	0.0625	4.09034e-88
0.1	0.2	2	0.75	0.5	0.375	3	-0.0674244	-0.0671058	0.037	0.183	0.999505	-0.000727323	0.00237411	0.579777	0.625	4.59048e-124	0.999505	-0.000209692	0.00237411	0.167154	0.208333	4.59048e-124	0.988026	-0.000299298	0.000344028	0.0404311	0.0416667	7.30407e-73
0.1	0.5	5	0.75	0.5	0.375	3	0.557713	0.557425	0.074	0.501	0.996869	0.00933752	4.55657e-26	0.573629	0.625	2.01398e-94	0.996869	0.00136973	4.55657e-26	0.0841461	0.104167	2.01398e-94	0.911068	0.00123377	6.99098e-25	0.0142575	0.0208333	1.26096e-40
0.001	0.0002	0.2	0.25	0.9	0.225	3	0.378549	0.378882	0.004	0.004	0.999982	0.000284893	6.29641e-06	0.774875	0.775	1.7191e-177	0.999982	0.000237384	6.29641e-06	0.645658	0.645833	1.7191e-177	0.999813	-0.000398905	0.00649586	0.580963	0.5625	1.10883e-139
0.001	0.0005	0.5	0.25	0.9	0.225	3	-0.249174	-0.246895	0.012	0.014	0.999938	-0.0007748	6.51485e-10	0.775652	0.775	1.66709e-157	0.999938	-0.000516317	6.51485e-10	0.516885	0.516667	1.66709e-157	0.999816	-0.000811294	3.39325e-10	0.460862	0.45	5.64604e-140
0.001	0.001	1	0.25	0.9	0.225	3	-1.36007	-1.33954	0.032	0.037	0.999699	-0.00728107	6.82854e-43	0.788376	0.775	4.50012e-132	0.999699	-0.00361515	6.82854e-43	0.391439	0.3875	4.50012e-132	0.999592	-0.00392601	5.71304e-44	0.351798	0.3375	3.72196e-127
0.001	0.002	2	0.25	0.9	0.225	3	0.146282	0.145126	0.053	0.06	0.999135	0.0017253	8.33828e-05	0.786007	0.775	4.3156e-115	0.999135	0.000569445	8.33828e-05	0.259426	0.258333	4.3156e-115	0.99835	0.000477966	0.00654249	0.234533	0.225	1.03256e-104
0.001	0.005	5	0.25	0.9	0.225	3	-0.977972	-0.964083	0.161	0.195	0.994554	-0.0318364	1.71196e-40	0.876278	0.775	1.59281e-85	0.994554	-0.00503544	1.71196e-40	0.138598	0.129167	1.59281e-85	0.991255	-0.00480084	2.84589e-38	0.112365	0.1125	6.49891e-78
0.01	0.002	0.2	0.25	0.9	0.225	3	0.118471	0.118599	0.004	0.004	0.999988	4.88377e-05	0.30682	0.769611	0.775	4.96818e-184	0.999988	4.04869e-05	0.30682	0.638015	0.645833	4.96818e-184	0.999863	-0.000593331	5.29669e-06	0.576565	0.5625	1.03483e-144
0.01	0.005	0.5	0.25	0.9	0.225	3	-0.554709	-0.550297	0.012	0.014	0.999934	-0.00133313	5.57512e-19	0.768174	0.775	1.47994e-156	0.999934	-0.000879285	5.57512e-19	0.506661	0.516667	1.47994e-156	0.999733	-0.00128779	7.86536e-15	0.453521	0.45	5.40202e-134
0.01	0.01	1	0.25	0.9	0.225	3	-1.53226	-1.51083	0.031	0.035	0.999751	-0.00788631	3.67647e-48	0.787913	0.775	4.01524e-135	0.999751	-0.00386151	3.67647e-48	0.385799	0.3875	4.01524e-135	0.999575	-0.00398086	1.62663e-44	0.343434	0.3375	1.59586e-126
0.01	0.02	2	0.25	0.9	0.225	3	0.138079	0.13741	0.048	0.054	0.999036	0.00182684	6.28107e-05	0.773473	0.775	2.40135e-113	0.999036	0.00059378	6.28107e-05	0.251402	0.258333	2.40135e-113	0.998435	0.000478189	0.00442731	0.229639	0.225	1.46527e-105
0.01	0.05	5	0.25	0.9	0.225	3	-0.735735	-0.727379	0.132	0.157	0.996529	-0.0199774	1.29637e-35	0.816651	0.775	9.21138e-93	0.996529	-0.00313568	1.29637e-35	0.128183	0.129167	9.21138e-93	0.993959	-0.00296993	1.08373e-30	0.109836	0.1125	7.38189e-84
0.1	0.02	0.2	0.25	0.9	0.225	3	0.0638645	0.0637918	0.003	0.003	0.999992	4.87265e-05	0.181104	0.730111	0.775	3.88212e-191	0.999992	3.88393e-05	0.181104	0.581963	0.645833	3.88212e-191	0.999911	-0.000401788	2.54927e-05	0.53033	0.5625	1.06498e-151
0.1	0.05	0.5	0.25	0.9	0.225	3	-0.666792	-0.665532	0.01	0.011	0.999929	-0.00115608	3.43764e-16	0.733616	0.775	3.02391e-155	0.999929	-0.000710123	3.43764e-16	0.450624	0.516667	3.02391e-155	0.999892	-0.000960884	2.8935e-20	0.406575	0.45	1.56955e-148
0.1	0.1	1	0.25	0.9	0.225	3	-1.66034	-1.65161	0.023	0.025	0.999864	-0.00563256	1.51727e-48	0.750117	0.775	9.17155e-145	0.999864	-0.0025136	1.51727e-48	0.334749	0.3875	9.17155e-145	0.999757	-0.00262213	5.02673e-44	0.304281	0.3375	1.60304e-135
0.1	0.2	2	0.25	0.9	0.225	3	0.176259	0.175971	0.032	0.036	0.99954	0.00153788	1.14108e-06	0.754371	0.775	3.20058e-125	0.99954	0.000447585	1.14108e-06	0.219552	0.258333	3.20058e-125	0.999357	0.000289738	0.00173787	0.196163	0.225	7.54088e-120
0.1	0.5	5	0.25	0.9	0.225	3	-0.519071	-0.516918	0.079	0.092	0.996959	-0.00830743	4.4573e-17	0.769177	0.775	6.92121e-95	0.996959	-0.00117308	4.4573e-17	0.108615	0.129167	6.92121e-95	0.997632	-0.00113569	2.80385e-22	0.0938142	0.1125	6.54135e-99
0.001	0.0002	0.2	0.5	0.9	0.45	3	-1.05286	-1.04475	0.007	0.008	0.999967	-0.000810197	3.8381e-23	0.550549	0.55	8.91166e-168	0.999967	-0.000675479	3.8381e-23	0.459005	0.458333	8.91166e-168	0.999838	-0.00102628	2.7453e-18	0.389237	0.375	4.61971e-142
0.001	0.0005	0.5	0.5	0.9	0.45	3	0.460472	0.45853	0.013	0.016	0.999869	0.00117751	4.40047e-16	0.553347	0.55	2.04935e-145	0.999869	0.000781301	4.40047e-16	0.367157	0.366667	2.04935e-145	0.999627	0.000472375	3.08332e-05	0.307492	0.3	1.29801e-128
0.001	0.001	1	0.5	0.9	0.45	3	1.1752	1.17139	0.021	0.026	0.999411	0.00682212	1.15305e-41	0.550079	0.55	2.85869e-121	0.999411	0.00339137	1.15305e-41	0.273452	0.275	2.85869e-121	0.99923	0.00314957	1.31734e-40	0.230155	0.225	5.91583e-117
0.001	0.002	2	0.5	0.9	0.45	3	1.004	1.00309	0.048	0.064	0.99758	0.011989	1.7913e-37	0.550206	0.55	1.4659e-98	0.99758	0.00395313	1.7913e-37	0.181419	0.183333	1.4659e-98	0.995842	0.00379568	3.4111e-35	0.143836	0.15	7.37201e-90
0.001	0.005	5	0.5	0.9	0.45	3	-0.481527	-0.469129	0.214	0.269	0.985227	-0.0138589	3.09546e-17	0.574229	0.55	1.73652e-69	0.985227	-0.00227839	3.09546e-17	0.0944025	0.0916667	1.73652e-69	0.973372	-0.00261065	1.65197e-17	0.0790105	0.075	5.11577e-60
0.01	0.002	0.2	0.5	0.9	0.45	3	-1.75108	-1.7464	0.008	0.01	0.999983	-0.00139809	4.87156e-48	0.543552	0.55	1.17262e-178	0.999983	-0.00115662	4.87156e-48	0.449674	0.458333	1.17262e-178	0.99985	-0.00155981	1.36431e-29	0.382101	0.375	3.32907e-143
0.01	0.005	0.5	0.5	0.9	0.45	3	0.354354	0.352655	0.012	0.015	0.999889	0.00068648	4.17392e-09	0.546444	0.55	4.14551e-148	0.999889	0.000450852	4.17392e-09	0.358882	0.366667	4.14551e-148	0.999673	0.000310216	0.00210219	0.300371	0.3	1.01477e-130
0.01	0.01	1	0.5	0.9	0.45	3	1.33715	1.33334	0.018	0.022	0.999523	0.00756107	1.49795e-48	0.538584	0.55	1.15051e-124	0.999523	0.00370794	1.49795e-48	0.264121	0.275	1.15051e-124	0.999226	0.00324566	3.27583e-42	0.22401	0.225	7.18934e-117
0.01	0.02	2	0.5	0.9	0.45	3	0.891197	0.89026	0.046	0.061	0.998254	0.00977959	1.8931e-36	0.547834	0.55	8.32129e-104	0.998254	0.00316721	1.8931e-36	0.177421	0.183333	8.32129e-104	0.997089	0.00300718	8.19463e-35	0.138134	0.15	1.3759e-95
0.01	0.05	5	0.5	0.9	0.45	3	-0.572014	-0.562235	0.186	0.234	0.995071	-0.0157791	3.29976e-33	0.589497	0.55	3.95564e-87	0.995071	-0.00255539	3.29976e-33	0.0954679	0.0916667	3.95564e-87	0.988179	-0.00244594	4.12144e-26	0.0768538	0.075	4.53874e-73
0.1	0.02	0.2	0.5	0.9	0.45	3	-1.23503	-1.233295760.000222	0.006	0.007	0.999981	-0.000707517	2.18487e-29	0.490654	0.55	2.13594e-176	0.999981	-0.000564052	2.18487e-29	0.391162	0.458333	2.13594e-176	0.99991	-0.000790828	2.4644e-22	0.335417	0.375	1.57758e-151
0.1	0.05	0.5	0.5	0.9	0.45	3	0.355207	0.354633	0.01	0.012	0.999931	0.000615919	3.36002e-12	0.496715	0.55	1.24215e-155	0.999931	0.000377159	3.36002e-12	0.304164	0.366667	1.24215e-155	0.999699	0.000166415	0.0419042	0.258685	0.3	4.59716e-132
0.1	0.1	1	0.5	0.9	0.45	3	1.49946	1.49833	0.012	0.015	0.999649	0.0056852	1.02559e-46	0.501623	0.55	1.34822e-129	0.999649	0.00253895	1.02559e-46	0.224019	0.275	1.34822e-129	0.999679	0.00243033	6.22862e-52	0.188965	0.225	4.95451e-131
0.1	0.2	2	0.5	0.9	0.45	3	0.838457	0.83813	0.034	0.043	0.999283	0.00559233	1.29596e-35	0.503679	0.55	4.1803e-118	0.999283	0.00162548	1.29596e-35	0.1464	0.183333	4.1803e-118	0.997177	0.00177386	2.33874e-25	0.118069	0.15	4.41661e-96
0.1	0.5	5	0.5	0.9	0.45	3	-0.687862	-0.682823	0.123	0.154	0.993692	-0.010294	5.76061e-22	0.526968	0.55	3.65587e-83	0.993692	-0.00149745	5.76061e-22	0.0766571	0.0916667	3.65587e-83	0.994233	-0.00159974	3.46856e-29	0.0640771	0.075	1.32656e-84
0.001	0.0002	0.2	0.75	0.9	0.675	3	-0.112403	-0.111642	0.009	0.013	0.999928	-9.12933e-05	0.0680272	0.324346	0.325	4.8395e-155	0.999928	-7.60733e-05	0.0680272	0.270273	0.270833	4.8395e-155	0.999662	-0.000326552	2.32902e-06	0.193718	0.1875	3.27065e-130
0.001	0.0005	0.5	0.75	0.9	0.675	3	-1.68088	-1.669	0.038	0.055	0.9998	-0.00407439	4.19287e-58	0.328472	0.325	1.35109e-138	0.9998	-0.00271566	4.19287e-58	0.218933	0.216667	1.35109e-138	0.998523	-0.00304206	4.40285e-41	0.157918	0.15	1.69445e-106
0.001	0.001	1	0.75	0.9	0.675	3	0.679306	0.678624	0.045	0.067	0.99862	0.00396874	1.32086e-29	0.320592	0.325	1.37893e-107	0.99862	0.00196597	1.32086e-29	0.15881	0.1625	1.37893e-107	0.997414	0.00181525	2.27372e-28	0.112194	0.1125	1.70974e-97
0.001	0.002	2	0.75	0.9	0.675	3	-1.36918	-1.34488	0.176	0.258	0.99615	-0.0170904	1.34719e-55	0.340029	0.325	4.26743e-91	0.99615	-0.00570549	1.34719e-55	0.113516	0.108333	4.26743e-91	0.985191	-0.0056394	3.41958e-46	0.0773496	0.075	1.8962e-69
0.001	0.005	5	0.75	0.9	0.675	3	-1.24128	-1.22402	0.467	0.501	0.961987	-0.0406716	1.02656e-48	0.316566	0.325	2.69982e-54	0.961987	-0.00639928	1.02656e-48	0.0498085	0.0541667	2.69982e-54	0.945844	-0.00635662	1.00824e-48	0.0410918	0.0375	1.32556e-48
0.01	0.002	0.2	0.75	0.9	0.675	3	-0.250561	-0.248704	0.009	0.013	0.999953	-0.000242104	2.58189e-08	0.317748	0.325	5.03805e-162	0.999953	-0.000200781	2.58189e-08	0.263514	0.270833	5.03805e-162	0.999786	-0.000332202	3.35425e-09	0.188909	0.1875	1.50691e-137
0.01	0.005	0.5	0.75	0.9	0.675	3	-1.44824	-1.44093	0.035	0.051	0.999601	-0.00350315	1.18178e-43	0.321	0.325	1.55933e-127	0.999601	-0.00231133	1.18178e-43	0.211792	0.216667	1.55933e-127	0.999399	-0.00233311	4.15334e-48	0.150208	0.15	5.97927e-121
0.01	0.01	1	0.75	0.9	0.675	3	0.465283	0.464344	0.046	0.067	0.99789	0.00242845	2.16874e-14	0.311353	0.325	9.19537e-101	0.99789	0.00118929	2.16874e-14	0.152479	0.1625	9.19537e-101	0.996377	0.00122822	1.6134e-16	0.107153	0.1125	4.47376e-92
0.01	0.02	2	0.75	0.9	0.675	3	-1.3322	-1.31065	0.162	0.236	0.99581	-0.0142575	1.34473e-50	0.319725	0.325	9.76953e-90	0.99581	-0.00467707	1.34473e-50	0.104883	0.108333	9.76953e-90	0.989065	-0.0049695	3.50988e-47	0.0769174	0.075	2.53528e-74
0.01	0.05	5	0.75	0.9	0.675	3	-0.981856	-0.972243	0.366	0.491	0.960024	-0.0260322	9.70378e-34	0.329048	0.325	1.74218e-53	0.960024	-0.00406247	9.70378e-34	0.0513497	0.0541667	1.74218e-53	0.966066	-0.00420444	1.09914e-43	0.0410138	0.0375	4.04419e-56
0.1	0.02	0.2	0.75	0.9	0.675	3	-0.17788	-0.177515	0.008	0.012	0.999949	-0.000121721	0.000878649	0.273582	0.325	1.74714e-160	0.999949	-9.70899e-05	0.000878649	0.218221	0.270833	1.74714e-160	0.999814	-0.000227869	1.24295e-07	0.159275	0.1875	9.21063e-140
0.1	0.05	0.5	0.75	0.9	0.675	3	-1.36305	-1.36219	0.029	0.041	0.99975	-0.00234604	9.11852e-43	0.279511	0.325	5.21361e-135	0.99975	-0.00144205	9.11852e-43	0.171808	0.216667	5.21361e-135	0.999492	-0.00153122	9.75717e-44	0.123933	0.15	1.23048e-123
0.1	0.1	1	0.75	0.9	0.675	3	0.572678	0.572843	0.035	0.05	0.998659	0.00182416	3.49438e-15	0.28095	0.325	4.75756e-108	0.998659	0.000814449	3.49438e-15	0.125438	0.1625	4.75756e-108	0.997089	0.000893177	4.99169e-16	0.089183	0.1125	1.37452e-95
0.1	0.2	2	0.75	0.9	0.675	3	-1.04459	-1.03602	0.113	0.165	0.997089	-0.00763297	7.24489e-40	0.293947	0.325	1.37328e-95	0.997089	-0.00223526	7.24489e-40	0.0860803	0.108333	1.37328e-95	0.990035	-0.00238026	6.131e-34	0.0607598	0.075	8.14542e-76
0.1	0.5	5	0.75	0.9	0.675	3	-0.61412	-0.611845	0.212	0.314	0.988664	-0.0101458	8.41645e-28	0.304767	0.325	9.63863e-74	0.988664	-0.00142478	8.41645e-28	0.0427986	0.0541667	9.63863e-74	0.983502	-0.00135745	1.94079e-29	0.0316696	0.0375	1.03369e-67

## Sheet: Simulation Scheme 2
Input information					Significance and sensitivity			Regression model: fG = a + b × f; direction H3-> H2						Regression model: fHom = a + b × f; direction H3 -> H2
T3 (1/μ Generations)	Ne (1/μ)	Ne/T3	T4/T3	Replicate	Z-score of d (f = 0)	Z-score of fHom (f = 0)	MF80 (H3 -> H2)	r2 of model	a	p-value for a	b	b predictor	p-value of b	r2 of model	a	p-value for a	b	b predictor	p-value of b
0.001	0.0002	0.2	1.5	1	2.416	2.29038	0.001	0.99999	0.0007769	1.04011e-28	0.747833	0.75	4.15531e-186	0.99999	0.000647096	1.04011e-28	0.622886	0.625	4.15531e-186
0.001	0.0002	0.2	2	1	0.700977	0.686214	0.002	0.999986	0.000196779	0.000224295	0.746904	0.75	6.12627e-181	0.999986	0.000164024	0.000224295	0.622575	0.625	6.12627e-181
0.001	0.0002	0.2	5	1	0.251516	0.247006	0.002	0.999987	3.90085e-05	0.426831	0.749227	0.75	2.92839e-182	0.999987	3.24891e-05	0.426831	0.62401	0.625	2.92839e-182
0.001	0.0002	0.2	10	1	0.957433	0.942573	0.002	0.999979	0.000369376	6.64929e-08	0.747506	0.75	9.54992e-175	0.999979	0.000307555	6.64929e-08	0.622399	0.625	9.54992e-175
0.001	0.0002	0.2	20	1	1.40167	1.39708	0.001	0.999984	0.000487754	6.939e-14	0.74704	0.75	1.60855e-179	0.999984	0.000405926	6.939e-14	0.621713	0.625	1.60855e-179
0.001	0.0005	0.5	1.5	1	1.65709	1.63248	0.004	0.999899	0.00285223	6.35556e-33	0.753045	0.75	1.45091e-149	0.999899	0.00189463	6.35556e-33	0.50022	0.5	1.45091e-149
0.001	0.0005	0.5	2	1	0.908135	0.895627	0.005	0.999938	0.00126623	4.3752e-19	0.745498	0.75	2.09128e-157	0.999938	0.000843791	4.3752e-19	0.496785	0.5	2.09128e-157
0.001	0.0005	0.5	5	1	-0.208598	-0.208423	0.007	0.99988	-0.000282614	0.0571311	0.745257	0.75	7.86564e-147	0.99988	-0.000188409	0.0571311	0.496837	0.5	7.86564e-147
0.001	0.0005	0.5	10	1	0.0594059	0.0590857	0.007	0.99992	0.000104901	0.385278	0.748249	0.75	2.75252e-153	0.99992	6.98591e-05	0.385278	0.498299	0.5	2.75252e-153
0.001	0.0005	0.5	20	1	-0.647034	-0.646412	0.008	0.999937	-0.00103041	6.90612e-15	0.746208	0.75	2.92873e-157	0.999937	-0.00068675	6.90612e-15	0.497335	0.5	2.92873e-157
0.001	0.001	1	1.5	1	-1.20634	-1.17754	0.031	0.999704	-0.00566085	3.77471e-37	0.751747	0.75	2.60283e-132	0.999704	-0.0028187	3.77471e-37	0.374317	0.375	2.60283e-132
0.001	0.001	1	2	1	2.32789	2.33367	0.005	0.999772	0.00923489	3.71227e-56	0.742723	0.75	1.65029e-136	0.999772	0.00461307	3.71227e-56	0.37101	0.375	1.65029e-136
0.001	0.001	1	5	1	-0.279301	-0.278151	0.019	0.999803	-0.00127564	2.74791e-09	0.750786	0.75	7.07383e-139	0.999803	-0.000635445	2.74791e-09	0.373996	0.375	7.07383e-139
0.001	0.001	1	10	1	-0.11671	-0.115987	0.018	0.999729	-0.00041727	0.0586752	0.73686	0.75	9.61653e-134	0.999729	-0.000209282	0.0586752	0.369572	0.375	9.61653e-134
0.001	0.001	1	20	1	-0.0327359	-0.0325469	0.018	0.999787	-0.000124712	0.519912	0.737619	0.75	1.32089e-137	0.999787	-6.25214e-05	0.519912	0.369788	0.375	1.32089e-137
0.001	0.002	2	1.5	1	-0.210388	-0.206175	0.053	0.99867	-0.00301669	6.17298e-08	0.766518	0.75	3.53778e-108	0.99867	-0.000990735	6.17298e-08	0.251738	0.25	3.53778e-108
0.001	0.002	2	2	1	-0.0522775	-0.0516273	0.051	0.998619	-0.000388762	0.443282	0.757198	0.75	1.41831e-107	0.998619	-0.000128249	0.443282	0.249793	0.25	1.41831e-107
0.001	0.002	2	5	1	0.0605697	0.0602888	0.04	0.998679	0.00072266	0.150369	0.763234	0.75	2.76248e-108	0.998679	0.000239134	0.150369	0.252561	0.25	2.76248e-108
0.001	0.002	2	10	1	0.45127	0.449427	0.034	0.9995	0.00394843	9.84311e-21	0.759814	0.75	6.86459e-124	0.9995	0.0013154	9.84311e-21	0.253128	0.25	6.86459e-124
0.001	0.002	2	20	1	0.292615	0.288131	0.035	0.998945	0.00237285	9.69925e-07	0.762917	0.75	6.67634e-112	0.998945	0.000789638	9.69925e-07	0.253885	0.25	6.67634e-112
0.001	0.005	5	1.5	1	1.30788	1.29408	0.08	0.991574	0.0408188	1.86721e-46	0.738142	0.75	1.64497e-78	0.991574	0.00710799	1.86721e-46	0.128537	0.125	1.64497e-78
0.001	0.005	5	2	1	1.31664	1.31476	0.08	0.994576	0.0453239	3.31003e-55	0.768805	0.75	1.368e-85	0.994576	0.00750876	3.31003e-55	0.127367	0.125	1.368e-85
0.001	0.005	5	5	1	-1.68899	-1.67542	0.193	0.991259	-0.0493129	9.9651e-51	0.760668	0.75	6.38956e-78	0.991259	-0.00830108	9.9651e-51	0.128047	0.125	6.38956e-78
0.001	0.005	5	10	1	0.595468	0.595301	0.092	0.995496	0.0156298	3.73805e-27	0.766458	0.75	1.41304e-88	0.995496	0.00257257	3.73805e-27	0.126154	0.125	1.41304e-88
0.001	0.005	5	20	1	1.62428	1.61998	0.053	0.994514	0.038988	7.26477e-51	0.757012	0.75	2.08029e-85	0.994514	0.00639376	7.26477e-51	0.124145	0.125	2.08029e-85
0.01	0.002	0.2	1.5	1	2.19344	2.14624	0.001	0.999981	0.000638438	2.14616e-17	0.741755	0.75	1.21815e-176	0.999981	0.00052892	2.14616e-17	0.614514	0.625	1.21815e-176
0.01	0.002	0.2	2	1	0.715612	0.707743	0.002	0.99999	0.000233052	6.486e-07	0.741393	0.75	3.81963e-186	0.99999	0.00019309	6.486e-07	0.614266	0.625	3.81963e-186
0.01	0.002	0.2	5	1	0.544047	0.542697	0.002	0.99999	0.00015877	0.000378877	0.741211	0.75	2.81164e-186	0.99999	0.000131624	0.000378877	0.614479	0.625	2.81164e-186
0.01	0.002	0.2	10	1	0.342884	0.342137	0.002	0.999987	0.000129052	0.00951936	0.742142	0.75	3.50942e-182	0.999987	0.000107012	0.00951936	0.615394	0.625	3.50942e-182
0.01	0.002	0.2	20	1	0.892155	0.890903	0.002	0.999992	0.00030069	4.43152e-12	0.742034	0.75	2.50272e-191	0.999992	0.000249412	4.43152e-12	0.61549	0.625	2.50272e-191
0.01	0.005	0.5	1.5	1	1.53464	1.51755	0.004	0.99996	0.00258373	1.27572e-43	0.744499	0.75	2.59545e-164	0.99996	0.00169934	1.27572e-43	0.489663	0.5	2.59545e-164
0.01	0.005	0.5	2	1	0.398806	0.395188	0.006	0.999945	0.000483094	5.10234e-06	0.738676	0.75	2.42143e-159	0.999945	0.000318937	5.10234e-06	0.487672	0.5	2.42143e-159
0.01	0.005	0.5	5	1	-0.508564	-0.506467	0.007	0.999964	-0.000687903	8.08664e-13	0.740498	0.75	3.75099e-166	0.999964	-0.000454172	8.08664e-13	0.488897	0.5	3.75099e-166
0.01	0.005	0.5	10	1	-0.126789	-0.126468	0.007	0.999941	-0.000204116	0.0487973	0.740041	0.75	3.20925e-158	0.999941	-0.000134865	0.0487973	0.488965	0.5	3.20925e-158
0.01	0.005	0.5	20	1	-0.352736	-0.352155	0.007	0.99995	-0.000467881	4.21067e-06	0.743334	0.75	6.76003e-161	0.99995	-0.000309228	4.21067e-06	0.491278	0.5	6.76003e-161
0.01	0.01	1	1.5	1	-1.01392	-0.991953	0.028	0.99973	-0.00488198	4.20791e-34	0.756887	0.75	7.98543e-134	0.99973	-0.00239806	4.20791e-34	0.371788	0.375	7.98543e-134
0.01	0.01	1	2	1	2.10004	2.10258	0.006	0.999812	0.00785155	2.36395e-54	0.737978	0.75	1.19968e-139	0.999812	0.00386537	2.36395e-54	0.363312	0.375	1.19968e-139
0.01	0.01	1	5	1	-0.10207	-0.101581	0.017	0.999804	-0.000293125	0.119285	0.742072	0.75	5.72923e-139	0.999804	-0.000144064	0.119285	0.364712	0.375	5.72923e-139
0.01	0.01	1	10	1	-0.199494	-0.19865	0.017	0.999809	-0.000772578	6.25464e-05	0.734621	0.75	2.40927e-139	0.999809	-0.000382086	6.25464e-05	0.363314	0.375	2.40927e-139
0.01	0.01	1	20	1	-0.131953	-0.131206	0.017	0.999798	-0.000548637	0.00448023	0.734696	0.75	1.88277e-138	0.999798	-0.000271517	0.00448023	0.363597	0.375	1.88277e-138
0.01	0.02	2	1.5	1	-0.221339	-0.217627	0.049	0.999331	-0.00216806	2.54195e-08	0.75064	0.75	3.15151e-119	0.999331	-0.000700967	2.54195e-08	0.242694	0.25	3.15151e-119
0.01	0.02	2	2	1	-0.139321	-0.138023	0.048	0.998553	-0.00165006	0.00210126	0.759095	0.75	8.0107e-107	0.998553	-0.000534322	0.00210126	0.24581	0.25	8.0107e-107
0.01	0.02	2	5	1	0.00111885	0.00111574	0.037	0.999377	-0.000110173	0.745961	0.757286	0.75	2.36192e-120	0.999377	-3.58334e-05	0.745961	0.246304	0.25	2.36192e-120
0.01	0.02	2	10	1	0.409215	0.407554	0.031	0.999173	0.00320704	4.68077e-12	0.755822	0.75	8.19619e-116	0.999173	0.00105109	4.68077e-12	0.247716	0.25	8.19619e-116
0.01	0.02	2	20	1	0.212197	0.21016	0.033	0.999518	0.00215204	3.88502e-10	0.757876	0.75	1.78762e-124	0.999518	0.000706052	3.88502e-10	0.248647	0.25	1.78762e-124
0.01	0.05	5	1.5	1	1.48578	1.47412	0.063	0.995779	0.0396934	4.13084e-56	0.741738	0.75	1.28236e-89	0.995779	0.00671465	4.13084e-56	0.125474	0.125	1.28236e-89
0.01	0.05	5	2	1	1.40813	1.40919	0.066	0.995167	0.0389346	1.69479e-52	0.764005	0.75	1.91187e-87	0.995167	0.00632547	1.69479e-52	0.124123	0.125	1.91187e-87
0.01	0.05	5	5	1	-1.52843	-1.51867	0.158	0.996407	-0.0368875	9.2768e-56	0.755857	0.75	3.30786e-92	0.996407	-0.0060849	9.2768e-56	0.124685	0.125	3.30786e-92
0.01	0.05	5	10	1	0.562602	0.562288	0.079	0.996062	0.0112693	3.51567e-20	0.790946	0.75	9.86323e-91	0.996062	0.00182969	3.51567e-20	0.128418	0.125	9.86323e-91
0.01	0.05	5	20	1	1.47574	1.47192	0.05	0.994962	0.0323594	1.13598e-46	0.752673	0.75	8.92072e-87	0.994962	0.00520406	1.13598e-46	0.121045	0.125	8.92072e-87
0.001	0.0002	0.2	1.5	2	0.0192703	0.0184982	0.002	0.999981	-1.2539e-06	0.98286	0.747975	0.75	1.41962e-176	0.999981	-1.04395e-06	0.98286	0.622735	0.625	1.41962e-176
0.001	0.0002	0.2	2	2	-0.674426	-0.659768	0.002	0.99999	-0.000161615	0.000310323	0.750472	0.75	1.2903e-186	0.99999	-0.000134513	0.000310323	0.624622	0.625	1.2903e-186
0.001	0.0002	0.2	5	2	-1.52247	-1.48402	0.003	0.999987	-0.000460413	2.74772e-14	0.750151	0.75	3.02758e-182	0.999987	-0.000383019	2.74772e-14	0.624054	0.625	3.02758e-182
0.001	0.0002	0.2	10	2	-1.16511	-1.14556	0.003	0.999987	-0.000479429	3.34229e-15	0.750374	0.75	1.40544e-182	0.999987	-0.00039919	3.34229e-15	0.624788	0.625	1.40544e-182
0.001	0.0002	0.2	20	2	-0.50492	-0.497486	0.003	0.999991	-0.000193445	1.31841e-05	0.750115	0.75	1.41909e-187	0.999991	-0.000160996	1.31841e-05	0.624288	0.625	1.41909e-187
0.001	0.0005	0.5	1.5	2	-0.0551071	-0.0533343	0.008	0.999902	-6.95182e-05	0.602274	0.750221	0.75	3.88461e-150	0.999902	-4.64659e-05	0.602274	0.501447	0.5	3.88461e-150
0.001	0.0005	0.5	2	2	0.933313	0.917672	0.006	0.999933	0.00155643	7.16072e-23	0.748117	0.75	2.77654e-156	0.999933	0.00103988	7.16072e-23	0.49983	0.5	2.77654e-156
0.001	0.0005	0.5	5	2	-1.48255	-1.46921	0.01	0.999923	-0.00226629	1.55639e-30	0.751051	0.75	4.74839e-154	0.999923	-0.00151151	1.55639e-30	0.500917	0.5	4.74839e-154
0.001	0.0005	0.5	10	2	-1.18081	-1.16867	0.01	0.999943	-0.00183139	8.40786e-29	0.752612	0.75	7.22216e-159	0.999943	-0.00122009	8.40786e-29	0.501399	0.5	7.22216e-159
0.001	0.0005	0.5	20	2	-1.02891	-1.02199	0.009	0.999944	-0.00156228	8.30417e-25	0.753589	0.75	5.65268e-159	0.999944	-0.00104327	8.30417e-25	0.503239	0.5	5.65268e-159
0.001	0.001	1	1.5	2	1.70018	1.70019	0.01	0.999765	0.00889421	1.39948e-54	0.741995	0.75	4.72809e-136	0.999765	0.00442948	1.39948e-54	0.369527	0.375	4.72809e-136
0.001	0.001	1	2	2	0.871787	0.863231	0.014	0.999789	0.00358802	3.48999e-29	0.754379	0.75	8.47815e-138	0.999789	0.0017996	3.48999e-29	0.378364	0.375	8.47815e-138
0.001	0.001	1	5	2	-1.38363	-1.39581	0.024	0.999816	-0.00545404	4.67222e-43	0.750781	0.75	5.77733e-140	0.999816	-0.00273978	4.67222e-43	0.377148	0.375	5.77733e-140
0.001	0.001	1	10	2	-1.23298	-1.2381	0.024	0.999832	-0.00490624	2.01468e-41	0.746774	0.75	2.03218e-141	0.999832	-0.00247685	2.01468e-41	0.376999	0.375	2.03218e-141
0.001	0.001	1	20	2	-1.20571	-1.21166	0.024	0.999763	-0.00453087	3.46754e-34	0.747652	0.75	6.33796e-136	0.999763	-0.00228528	3.46754e-34	0.377101	0.375	6.33796e-136
0.001	0.002	2	1.5	2	-0.480979	-0.473736	0.053	0.998936	-0.00466625	8.9598e-17	0.742372	0.75	9.22606e-112	0.998936	-0.0015294	8.9598e-17	0.243318	0.25	9.22606e-112
0.001	0.002	2	2	2	-2.10212	-2.08278	0.082	0.998681	-0.0250626	2.96452e-58	0.783251	0.75	2.58982e-108	0.998681	-0.00826722	2.96452e-58	0.258365	0.25	2.58982e-108
0.001	0.002	2	5	2	0.801503	0.798946	0.031	0.998887	0.00750293	7.35487e-27	0.750057	0.75	4.82212e-111	0.998887	0.00246183	7.35487e-27	0.246106	0.25	4.82212e-111
0.001	0.002	2	10	2	-0.489294	-0.48668	0.045	0.999197	-0.00456222	7.75687e-19	0.755885	0.75	2.70365e-116	0.999197	-0.00151433	7.75687e-19	0.2509	0.25	2.70365e-116
0.001	0.002	2	20	2	0.311832	0.312048	0.037	0.998915	0.00262218	9.16167e-08	0.749788	0.75	1.86822e-111	0.998915	0.000873397	9.16167e-08	0.24974	0.25	1.86822e-111
0.001	0.005	5	1.5	2	0.578106	0.576959	0.11	0.991721	0.0165474	2.81971e-22	0.728894	0.75	8.55441e-79	0.991721	0.00265913	2.81971e-22	0.117132	0.125	8.55441e-79
0.001	0.005	5	2	2	-0.383153	-0.377346	0.163	0.989305	-0.0119675	2.23494e-13	0.719383	0.75	1.11757e-74	0.989305	-0.00196931	2.23494e-13	0.118378	0.125	1.11757e-74
0.001	0.005	5	5	2	-0.0740393	-0.0736355	0.135	0.99356	-0.00299103	0.00592705	0.731933	0.75	7.86131e-83	0.99356	-0.000510905	0.00592705	0.125023	0.125	7.86131e-83
0.001	0.005	5	10	2	0.86472	0.867587	0.083	0.997112	0.0219658	5.06081e-43	0.763088	0.75	1.0138e-95	0.997112	0.0036474	5.06081e-43	0.12671	0.125	1.0138e-95
0.001	0.005	5	20	2	-0.396982	-0.394547	0.123	0.99594	-0.0105216	4.70829e-19	0.766006	0.75	3.02429e-90	0.99594	-0.00174867	4.70829e-19	0.127309	0.125	3.02429e-90
0.01	0.002	0.2	1.5	2	0.0760161	0.0745022	0.002	0.99999	2.91167e-05	0.48699	0.743698	0.75	4.18764e-187	0.99999	2.41076e-05	0.48699	0.615758	0.625	4.18764e-187
0.01	0.002	0.2	2	2	-1.13083	-1.12126	0.002	0.999989	-0.000376289	7.1433e-13	0.744721	0.75	7.89938e-186	0.999989	-0.000311744	7.1433e-13	0.616979	0.625	7.89938e-186
0.01	0.002	0.2	5	2	-0.436098	-0.432888	0.002	0.999991	-0.00013378	0.00111977	0.744034	0.75	6.9399e-189	0.999991	-0.000110834	0.00111977	0.616413	0.625	6.9399e-189
0.01	0.002	0.2	10	2	-0.396221	-0.394527	0.002	0.999987	-0.000118369	0.0161162	0.744796	0.75	1.43276e-182	0.999987	-9.80926e-05	0.0161162	0.617215	0.625	1.43276e-182
0.01	0.002	0.2	20	2	-2.16563	-2.1617	0.003	0.999986	-0.000794517	1.3863e-25	0.746014	0.75	2.18256e-181	0.999986	-0.00065863	1.3863e-25	0.618423	0.625	2.18256e-181
0.01	0.005	0.5	1.5	2	-0.0352576	-0.0344222	0.008	0.999922	-0.000232442	0.0521632	0.745888	0.75	8.1545e-154	0.999922	-0.000153865	0.0521632	0.493739	0.5	8.1545e-154
0.01	0.005	0.5	2	2	0.492489	0.486198	0.006	0.999938	0.000715128	2.46839e-09	0.745794	0.75	2.22568e-157	0.999938	0.000473291	2.46839e-09	0.493586	0.5	2.22568e-157
0.01	0.005	0.5	5	2	-0.889986	-0.884242	0.009	0.999947	-0.00131129	1.1706e-21	0.747634	0.75	4.25656e-160	0.999947	-0.0008672	1.1706e-21	0.494435	0.5	4.25656e-160
0.01	0.005	0.5	10	2	-1.13079	-1.12462	0.009	0.999935	-0.00157836	1.6703e-23	0.747665	0.75	1.14649e-156	0.999935	-0.00104358	1.6703e-23	0.49434	0.5	1.14649e-156
0.01	0.005	0.5	20	2	-0.620444	-0.617766	0.008	0.999952	-0.000848225	7.65081e-14	0.74663	0.75	1.21685e-161	0.999952	-0.000561258	7.65081e-14	0.494034	0.5	1.21685e-161
0.01	0.01	1	1.5	2	1.78772	1.78136	0.009	0.999764	0.00855206	2.97331e-53	0.742092	0.75	6.16649e-136	0.999764	0.00420294	2.97331e-53	0.364704	0.375	6.16649e-136
0.01	0.01	1	2	2	0.921475	0.915632	0.013	0.999637	0.00376437	5.41524e-24	0.739778	0.75	4.7523e-129	0.999637	0.00186242	5.41524e-24	0.366005	0.375	4.7523e-129
0.01	0.01	1	5	2	-1.2816	-1.28549	0.022	0.999766	-0.00428545	4.97347e-33	0.741519	0.75	4.12425e-136	0.999766	-0.00212399	4.97347e-33	0.367517	0.375	4.12425e-136
0.01	0.01	1	10	2	-1.31698	-1.32045	0.022	0.999811	-0.00444316	4.90857e-37	0.741213	0.75	1.63931e-139	0.999811	-0.00221219	4.90857e-37	0.36904	0.375	1.63931e-139
0.01	0.01	1	20	2	-1.36648	-1.37038	0.023	0.999603	-0.00470709	2.22052e-28	0.742899	0.75	1.33792e-127	0.999603	-0.00234468	2.22052e-28	0.37005	0.375	1.33792e-127
0.01	0.02	2	1.5	2	-0.634877	-0.627222	0.051	0.999158	-0.00618675	9.37687e-26	0.742714	0.75	1.62399e-115	0.999158	-0.00199596	9.37687e-26	0.239614	0.25	1.62399e-115
0.01	0.02	2	2	2	-2.20117	-2.18355	0.076	0.99867	-0.0228018	3.59642e-56	0.758819	0.75	3.504e-108	0.99867	-0.00740471	3.59642e-56	0.246421	0.25	3.504e-108
0.01	0.02	2	5	2	0.796839	0.796085	0.028	0.998967	0.00675314	3.68856e-25	0.749704	0.75	3.08573e-112	0.998967	0.00218482	3.68856e-25	0.242549	0.25	3.08573e-112
0.01	0.02	2	10	2	-0.10798	-0.107783	0.037	0.999542	-0.0011378	0.000189631	0.755204	0.75	2.60576e-125	0.999542	-0.000371101	0.000189631	0.246314	0.25	2.60576e-125
0.01	0.02	2	20	2	0.274381	0.274566	0.035	0.999463	0.00189253	4.12555e-08	0.745298	0.75	9.24169e-123	0.999463	0.000621462	4.12555e-08	0.244738	0.25	9.24169e-123
0.01	0.05	5	1.5	2	0.404867	0.404658	0.098	0.995274	0.0103015	4.90161e-18	0.729288	0.75	8.39079e-88	0.995274	0.00163731	4.90161e-18	0.115912	0.125	8.39079e-88
0.01	0.05	5	2	2	-0.488013	-0.482395	0.141	0.994084	-0.0138627	5.53456e-23	0.701793	0.75	3.40468e-84	0.994084	-0.0022378	5.53456e-23	0.113287	0.125	3.40468e-84
0.01	0.05	5	5	2	-0.112034	-0.11154	0.115	0.996081	-0.00296785	0.000404026	0.712782	0.75	8.21351e-91	0.996081	-0.00049562	0.000404026	0.119032	0.125	8.21351e-91
0.01	0.05	5	10	2	0.942993	0.947448	0.067	0.997077	0.0199301	1.95253e-40	0.751228	0.75	1.58759e-95	0.997077	0.00324403	1.95253e-40	0.122278	0.125	1.58759e-95
0.01	0.05	5	20	2	-0.394184	-0.392701	0.105	0.99516	-0.00873344	5.10216e-14	0.754	0.75	2.02285e-87	0.99516	-0.00143152	5.10216e-14	0.12359	0.125	2.02285e-87
0.001	0.0002	0.2	1.5	3	-0.509242	-0.491164	0.002	0.999988	-0.000143703	0.0034356	0.75123	0.75	3.33184e-183	0.999988	-0.000119679	0.0034356	0.625642	0.625	3.33184e-183
0.001	0.0002	0.2	2	3	0.402104	0.392447	0.002	0.999985	5.0114e-05	0.336676	0.750232	0.75	2.19571e-180	0.999985	4.17742e-05	0.336676	0.625381	0.625	2.19571e-180
0.001	0.0002	0.2	5	3	-0.286363	-0.276761	0.002	0.999982	-0.000113846	0.0509082	0.750933	0.75	3.79036e-177	0.999982	-9.49395e-05	0.0509082	0.626224	0.625	3.79036e-177
0.001	0.0002	0.2	10	3	0.374421	0.367053	0.002	0.999987	7.62923e-05	0.118576	0.748851	0.75	1.40503e-182	0.999987	6.36418e-05	0.118576	0.624679	0.625	1.40503e-182
0.001	0.0002	0.2	20	3	-1.06596	-1.04998	0.003	0.999989	-0.000363038	8.53879e-12	0.748798	0.75	5.68225e-185	0.999989	-0.000302545	8.53879e-12	0.624025	0.625	5.68225e-185
0.001	0.0005	0.5	1.5	3	-0.48575	-0.482271	0.009	0.999886	-0.00071968	3.74196e-06	0.751961	0.75	1.25804e-147	0.999886	-0.000476855	3.74196e-06	0.498244	0.5	1.25804e-147
0.001	0.0005	0.5	2	3	-0.428672	-0.425695	0.009	0.999888	-0.000596447	7.1488e-05	0.748396	0.75	5.68737e-148	0.999888	-0.000397771	7.1488e-05	0.499105	0.5	5.68737e-148
0.001	0.0005	0.5	5	3	0.991707	0.986469	0.005	0.999931	0.00153576	3.45466e-22	0.748027	0.75	8.99196e-156	0.999931	0.00102212	3.45466e-22	0.497845	0.5	8.99196e-156
0.001	0.0005	0.5	10	3	1.23726	1.239	0.005	0.999942	0.00201948	1.79149e-31	0.745802	0.75	1.20065e-158	0.999942	0.00134438	1.79149e-31	0.496485	0.5	1.20065e-158
0.001	0.0005	0.5	20	3	1.58521	1.58281	0.004	0.999946	0.00246369	5.48765e-38	0.745238	0.75	1.06158e-159	0.999946	0.00163988	5.48765e-38	0.496045	0.5	1.06158e-159
0.001	0.001	1	1.5	3	-0.367165	-0.366568	0.023	0.999771	-0.00183982	2.15186e-13	0.759345	0.75	1.85114e-136	0.999771	-0.000915429	2.15186e-13	0.377823	0.375	1.85114e-136
0.001	0.001	1	2	3	-1.45263	-1.43302	0.029	0.999747	-0.00681623	1.07496e-44	0.757061	0.75	7.82131e-135	0.999747	-0.00341097	1.07496e-44	0.378848	0.375	7.82131e-135
0.001	0.001	1	5	3	0.953404	0.944776	0.012	0.999731	0.00373695	1.04423e-27	0.735924	0.75	7.01605e-134	0.999731	0.00187893	1.04423e-27	0.37002	0.375	7.01605e-134
0.001	0.001	1	10	3	1.49446	1.49639	0.01	0.999822	0.00614071	1.94021e-47	0.741687	0.75	1.8742e-140	0.999822	0.00309505	1.94021e-47	0.373825	0.375	1.8742e-140
0.001	0.001	1	20	3	1.56058	1.55269	0.009	0.999871	0.00633172	3.0766e-53	0.74427	0.75	1.12824e-145	0.999871	0.00319401	3.0766e-53	0.375444	0.375	1.12824e-145
0.001	0.002	2	1.5	3	-0.327349	-0.325358	0.056	0.998873	-0.00398576	5.30757e-13	0.758399	0.75	7.80184e-111	0.998873	-0.00132136	5.30757e-13	0.251425	0.25	7.80184e-111
0.001	0.002	2	2	3	-1.0892	-1.06653	0.066	0.998942	-0.0120127	1.35039e-40	0.749195	0.75	7.43945e-112	0.998942	-0.00397932	1.35039e-40	0.248178	0.25	7.43945e-112
0.001	0.002	2	5	3	-0.243658	-0.242694	0.045	0.999262	-0.00244841	6.6947e-09	0.767741	0.75	1.22656e-117	0.999262	-0.000821284	6.6947e-09	0.257527	0.25	1.22656e-117
0.001	0.002	2	10	3	0.289583	0.287696	0.037	0.999251	0.00269551	3.02813e-10	0.755891	0.75	2.05411e-117	0.999251	0.000898605	3.02813e-10	0.251992	0.25	2.05411e-117
0.001	0.002	2	20	3	-0.630396	-0.622393	0.047	0.998969	-0.00604337	3.13742e-22	0.758512	0.75	2.88514e-112	0.998969	-0.00202449	3.13742e-22	0.254097	0.25	2.88514e-112
0.001	0.005	5	1.5	3	-0.0727747	-0.0721668	0.136	0.99446	-0.00270987	0.00988233	0.765336	0.75	3.00265e-85	0.99446	-0.000463938	0.00988233	0.131028	0.125	3.00265e-85
0.001	0.005	5	2	3	-0.599992	-0.590693	0.153	0.99496	-0.0167839	8.20829e-28	0.758187	0.75	9.08326e-87	0.99496	-0.00285634	8.20829e-28	0.129031	0.125	9.08326e-87
0.001	0.005	5	5	3	0.65027	0.646291	0.113	0.99193	0.0213211	9.74548e-30	0.70626	0.75	3.32691e-79	0.99193	0.00355671	9.74548e-30	0.117816	0.125	3.32691e-79
0.001	0.005	5	10	3	1.04724	1.04384	0.079	0.99509	0.0290846	2.49446e-42	0.792358	0.75	3.44059e-87	0.99509	0.00470338	2.49446e-42	0.128135	0.125	3.44059e-87
0.001	0.005	5	20	3	-0.869881	-0.8639	0.133	0.996247	-0.0189468	7.25896e-37	0.712733	0.75	1.64723e-91	0.996247	-0.00325725	7.25896e-37	0.12253	0.125	1.64723e-91
0.01	0.002	0.2	1.5	3	-0.873539	-0.857697	0.002	0.999991	-0.000262804	3.35891e-09	0.744892	0.75	3.62823e-189	0.999991	-0.000217954	3.35891e-09	0.617769	0.625	3.62823e-189
0.01	0.002	0.2	2	3	0.904403	0.899726	0.001	0.99999	0.000255145	4.25547e-08	0.743537	0.75	4.90165e-187	0.99999	0.000211682	4.25547e-08	0.616878	0.625	4.90165e-187
0.01	0.002	0.2	5	3	-0.0962855	-0.095499	0.002	0.999984	-2.36916e-05	0.660812	0.743305	0.75	6.74101e-179	0.999984	-1.96541e-05	0.660812	0.616631	0.625	6.74101e-179
0.01	0.002	0.2	10	3	-0.597372	-0.593667	0.002	0.999992	-0.000233567	1.52226e-08	0.74561	0.75	3.1215e-191	0.999992	-0.000193807	1.52226e-08	0.618686	0.625	3.1215e-191
0.01	0.002	0.2	20	3	0.698211	0.696416	0.002	0.99999	0.000276643	4.57633e-09	0.744591	0.75	3.7315e-187	0.99999	0.00022966	4.57633e-09	0.618134	0.625	3.7315e-187
0.01	0.005	0.5	1.5	3	-0.15659	-0.155815	0.008	0.999928	-0.000293368	0.0115718	0.747468	0.75	3.95714e-155	0.999928	-0.000192693	0.0115718	0.490959	0.5	3.95714e-155
0.01	0.005	0.5	2	3	-0.185381	-0.1845	0.008	0.999938	-0.000304821	0.00475857	0.743213	0.75	1.77669e-157	0.999938	-0.000201401	0.00475857	0.491055	0.5	1.77669e-157
0.01	0.005	0.5	5	3	1.12603	1.12273	0.005	0.999942	0.00161165	1.05614e-25	0.741005	0.75	1.35893e-158	0.999942	0.00106218	1.05614e-25	0.48837	0.5	1.35893e-158
0.01	0.005	0.5	10	3	1.2973	1.29637	0.004	0.999901	0.00196154	7.50258e-24	0.742111	0.75	6.59357e-150	0.999901	0.00129367	7.50258e-24	0.489433	0.5	6.59357e-150
0.01	0.005	0.5	20	3	0.986781	0.986951	0.005	0.999925	0.00146911	2.52697e-20	0.742721	0.75	2.4586e-154	0.999925	0.000969452	2.52697e-20	0.490115	0.5	2.4586e-154
0.01	0.01	1	1.5	3	-0.265557	-0.265199	0.021	0.999824	-0.00127244	6.60969e-10	0.754292	0.75	1.19088e-140	0.999824	-0.00062434	6.60969e-10	0.370104	0.375	1.19088e-140
0.01	0.01	1	2	3	-1.53979	-1.52193	0.028	0.999582	-0.00627565	2.46762e-35	0.747932	0.75	8.76112e-127	0.999582	-0.00309549	2.46762e-35	0.368921	0.375	8.76112e-127
0.01	0.01	1	5	3	1.10425	1.09829	0.011	0.999811	0.00421386	8.15166e-36	0.734928	0.75	1.45442e-139	0.999811	0.00209106	8.15166e-36	0.364697	0.375	1.45442e-139
0.01	0.01	1	10	3	1.38883	1.38679	0.01	0.999786	0.00548894	9.82064e-42	0.73316	0.75	1.46232e-137	0.999786	0.0027317	9.82064e-42	0.364874	0.375	1.46232e-137
0.01	0.01	1	20	3	1.54546	1.54281	0.009	0.999845	0.00577039	8.64617e-48	0.738775	0.75	1.06759e-142	0.999845	0.00287233	8.64617e-48	0.367741	0.375	1.06759e-142
0.01	0.02	2	1.5	3	-0.478235	-0.475234	0.053	0.999212	-0.0052472	1.95452e-22	0.746818	0.75	1.38209e-116	0.999212	-0.00170985	1.95452e-22	0.243358	0.25	1.38209e-116
0.01	0.02	2	2	3	-1.11687	-1.09952	0.06	0.998307	-0.0113226	4.4534e-32	0.753249	0.75	2.66352e-104	0.998307	-0.00369496	4.4534e-32	0.245812	0.25	2.66352e-104
0.01	0.02	2	5	3	-0.0135352	-0.013526	0.039	0.999368	-0.00017733	0.604256	0.756166	0.75	3.96303e-120	0.999368	-5.84362e-05	0.604256	0.249182	0.25	3.96303e-120
0.01	0.02	2	10	3	0.172011	0.171519	0.035	0.999092	0.00135268	0.00132563	0.750581	0.75	2.59724e-114	0.999092	0.000442987	0.00132563	0.245807	0.25	2.59724e-114
0.01	0.02	2	20	3	-0.546143	-0.542053	0.042	0.99939	-0.00496075	5.16805e-24	0.751071	0.75	1.06772e-120	0.99939	-0.00163532	5.16805e-24	0.247591	0.25	1.06772e-120
0.01	0.05	5	1.5	3	-0.067736	-0.0672244	0.118	0.994407	-0.00340648	0.0019524	0.789483	0.75	4.25974e-85	0.994407	-0.00056705	0.0019524	0.131419	0.125	4.25974e-85
0.01	0.05	5	2	3	-0.673217	-0.663693	0.134	0.99561	-0.0156515	2.01259e-28	0.740283	0.75	5.46047e-89	0.99561	-0.00260476	2.01259e-28	0.1232	0.125	5.46047e-89
0.01	0.05	5	5	3	0.706414	0.704725	0.092	0.995714	0.0204556	6.44213e-37	0.718531	0.75	2.24926e-89	0.995714	0.00332157	6.44213e-37	0.116675	0.125	2.24926e-89
0.01	0.05	5	10	3	1.08905	1.08848	0.066	0.997328	0.0252359	3.96267e-47	0.794893	0.75	5.71622e-97	0.997328	0.00399378	3.96267e-47	0.125798	0.125	5.71622e-97
0.01	0.05	5	20	3	-1.08833	-1.08442	0.118	0.997301	-0.02021	2.32653e-43	0.717996	0.75	8.397e-97	0.997301	-0.00338513	2.32653e-43	0.120263	0.125	8.397e-97

## Sheet: Simulation Scheme 3
Input information						Significance and sensitivity			Regression model: fG = a + b × f; direction H3-> H2						Regression model: fHom = a + b × f; direction H3 -> H2
T3 (1/μ Generations)	Ne (1/μ)	Ne/T3	Loci number	Loci Size	Replicate	Z-score of d (f = 0)	Z-score of fHom (f = 0)	MF80 (H3 -> H2)	r2 of model	a	p-value for a	b	b predictor	p-value of b	r2 of model	a	p-value for a	b	b predictor	p-value of b
0.001	0.0002	0.2	0.0002	0.05	1	0.372888	0.205356	0.004	0.999656	0.000158253	0.530864	0.755924	0.75	6.88709e-130	0.999656	0.000131001	0.530864	0.625751	0.625	6.88709e-130
0.001	0.0002	0.2	0.0005	0.02	1	1.0585	0.783438	0.003	0.999895	0.000627336	1.6703e-05	0.741549	0.75	5.85056e-149	0.999895	0.000524263	1.6703e-05	0.61971	0.625	5.85056e-149
0.001	0.0002	0.2	0.001	0.01	1	0.460657	0.387135	0.003	0.999941	0.000192878	0.066717	0.751166	0.75	3.7705e-158	0.999941	0.000160746	0.066717	0.626028	0.625	3.7705e-158
0.001	0.0002	0.2	0.002	0.005	1	-1.7382	-1.61496	0.004	0.99997	-0.000762628	4.46133e-16	0.749976	0.75	3.90261e-169	0.99997	-0.000633884	4.46133e-16	0.623368	0.625	3.90261e-169
0.001	0.0002	0.2	0.005	0.002	1	0.343478	0.335328	0.002	0.999982	5.72762e-05	0.319803	0.750411	0.75	3.15127e-177	0.999982	4.77736e-05	0.319803	0.625911	0.625	3.15127e-177
0.001	0.0002	0.2	0.01	0.001	1	0.330019	0.319081	0.001	0.999989	7.36279e-05	0.095776	0.750181	0.75	6.61312e-186	0.999989	6.13053e-05	0.095776	0.624629	0.625	6.61312e-186
0.001	0.0005	0.5	0.0002	0.05	1	-0.581397	-0.44636	0.035	0.998796	-0.00350724	2.49104e-10	0.770453	0.75	8.97488e-110	0.998796	-0.00228227	2.49104e-10	0.501357	0.5	8.97488e-110
0.001	0.0005	0.5	0.0005	0.02	1	0.133561	0.115135	0.02	0.99949	0.000683454	0.0233344	0.729518	0.75	1.37409e-123	0.99949	0.000457107	0.0233344	0.487915	0.5	1.37409e-123
0.001	0.0005	0.5	0.001	0.01	1	0.850966	0.776212	0.012	0.999742	0.00290084	5.17882e-22	0.734613	0.75	1.63801e-134	0.999742	0.00192531	5.17882e-22	0.487569	0.5	1.63801e-134
0.001	0.0005	0.5	0.002	0.005	1	0.823779	0.790605	0.009	0.999913	0.00216484	8.15325e-28	0.744912	0.75	6.03256e-152	0.999913	0.00145575	8.15325e-28	0.500918	0.5	6.03256e-152
0.001	0.0005	0.5	0.005	0.002	1	-0.451615	-0.451709	0.009	0.999916	-0.000854789	1.5192e-09	0.752852	0.75	1.75457e-152	0.999916	-0.000568269	1.5192e-09	0.500501	0.5	1.75457e-152
0.001	0.0005	0.5	0.01	0.001	1	-0.905945	-0.900024	0.008	0.999965	-0.00121127	2.4513e-24	0.752074	0.75	1.80185e-166	0.999965	-0.00080533	2.4513e-24	0.0.0005272	0.5	1.80185e-166
0.001	0.001	1	0.0002	0.05	1	0.309115	0.237488	0.083	0.99429	0.00708998	9.00069e-10	0.74399	0.75	9.15497e-85	0.99429	0.00354349	9.00069e-10	0.371838	0.375	9.15497e-85
0.001	0.001	1	0.0005	0.02	1	0.797627	0.727518	0.048	0.997821	0.0100228	3.83525e-27	0.707803	0.75	3.02214e-100	0.997821	0.00505627	3.83525e-27	0.357071	0.375	3.02214e-100
0.001	0.001	1	0.001	0.01	1	0.814615	0.793319	0.032	0.998868	0.00792058	3.3085e-28	0.74509	0.75	9.07689e-111	0.998868	0.00394262	3.3085e-28	0.370883	0.375	9.07689e-111
0.001	0.001	1	0.002	0.005	1	2.17301	2.13117	0.009	0.999281	0.0149657	1.947e-53	0.73978	0.75	4.73202e-118	0.999281	0.00754902	1.947e-53	0.373162	0.375	4.73202e-118
0.001	0.001	1	0.005	0.002	1	-2.04119	-2.01163	0.032	0.999589	-0.00921298	2.96927e-46	0.762517	0.75	4.74607e-127	0.999589	-0.00459349	2.96927e-46	0.380182	0.375	4.74607e-127
0.001	0.001	1	0.01	0.001	1	0.0646736	0.0644869	0.015	0.999896	0.000194571	0.157899	0.74784	0.75	3.48147e-149	0.999896	9.61938e-05	0.157899	0.369725	0.375	3.48147e-149
0.001	0.002	2	0.0002	0.05	1	0.530761	0.45252	0.192	0.970284	0.0224583	2.17335e-13	0.801511	0.75	2.96936e-58	0.970284	0.00682222	2.17335e-13	0.243477	0.25	2.96936e-58
0.001	0.002	2	0.0005	0.02	1	-1.87107	-1.71081	0.225	0.989103	-0.0620684	2.75965e-52	0.814179	0.75	2.23396e-74	0.989103	-0.0209066	2.75965e-52	0.274242	0.25	2.23396e-74
0.001	0.002	2	0.001	0.01	1	-0.130665	-0.124376	0.108	0.992207	-0.0026995	0.0271467	0.754376	0.75	9.13287e-80	0.992207	-0.000876653	0.0271467	0.244981	0.25	9.13287e-80
0.001	0.002	2	0.002	0.005	1	-2.12568	-2.08657	0.122	0.99758	-0.0369734	5.16204e-61	0.78059	0.75	1.4638e-98	0.99758	-0.0124656	5.16204e-61	0.263175	0.25	1.4638e-98
0.001	0.002	2	0.005	0.002	1	-1.02325	-1.00722	0.067	0.999164	-0.0116882	3.8411e-43	0.752174	0.75	1.24747e-115	0.999164	-0.00386488	3.8411e-43	0.248717	0.25	1.24747e-115
0.001	0.002	2	0.01	0.001	1	0.0968072	0.0957517	0.031	0.999262	0.000951427	0.0103872	0.743109	0.75	1.22488e-117	0.999262	0.000318008	0.0103872	0.248379	0.25	1.22488e-117
0.001	0.005	5	0.0002	0.05	1	1.12304	0.861866	0.466	0.782059	0.1493	4.92058e-33	0.748284	0.75	3.43736e-26	0.782059	0.0252178	4.92058e-33	0.12639	0.125	3.43736e-26
0.001	0.005	5	0.0005	0.02	1	-1.11882	-1.03803	0.501	0.934472	-0.0992943	6.01681e-41	0.752	0.75	1.54146e-45	0.934472	-0.015799	6.01681e-41	0.119653	0.125	1.54146e-45
0.001	0.005	5	0.001	0.01	1	2.05794	2.01322	0.117	0.973761	0.126255	5.89245e-63	0.751738	0.75	2.96851e-60	0.973761	0.0216865	5.89245e-63	0.129124	0.125	2.96851e-60
0.001	0.005	5	0.002	0.005	1	-1.19759	-1.1943	0.322	0.987356	-0.062021	8.60941e-55	0.695783	0.75	5.47164e-72	0.987356	-0.010543	8.60941e-55	0.118277	0.125	5.47164e-72
0.001	0.005	5	0.005	0.002	1	-1.21201	-1.19023	0.184	0.990778	-0.0371008	1.395e-41	0.754749	0.75	4.64617e-77	0.990778	-0.00639918	1.395e-41	0.13018	0.125	4.64617e-77
0.001	0.005	5	0.01	0.001	1	-1.40769	-1.40367	0.14	0.995734	-0.0286311	1.44521e-46	0.726457	0.75	1.90228e-89	0.995734	-0.00473592	1.44521e-46	0.120164	0.125	1.90228e-89
0.01	0.002	0.2	0.0002	0.05	1	0.311387	0.239155	0.005	0.999843	0.000112009	0.508689	0.752071	0.75	1.53329e-142	0.999843	9.23218e-05	0.508689	0.619886	0.625	1.53329e-142
0.01	0.002	0.2	0.0005	0.02	1	0.708805	0.63215	0.003	0.999852	0.000507611	0.00222484	0.73371	0.75	2.10095e-143	0.999852	0.000422187	0.00222484	0.610236	0.625	2.10095e-143
0.01	0.002	0.2	0.001	0.01	1	0.659047	0.613209	0.003	0.999944	0.000264279	0.009821	0.745243	0.75	3.85678e-159	0.999944	0.000219141	0.009821	0.617958	0.625	3.85678e-159
0.01	0.002	0.2	0.002	0.005	1	-1.32976	-1.28802	0.004	0.999987	-0.000586488	1.50333e-19	0.7448	0.75	8.41071e-183	0.999987	-0.000485114	1.50333e-19	0.616062	0.625	8.41071e-183
0.01	0.002	0.2	0.005	0.002	1	0.0243412	0.0241214	0.002	0.999985	-2.90947e-05	0.573781	0.74599	0.75	2.08964e-180	0.999985	-2.4119e-05	0.573781	0.618414	0.625	2.08964e-180
0.01	0.002	0.2	0.01	0.001	1	-0.190642	-0.189601	0.002	0.999993	-4.32249e-05	0.227609	0.744505	0.75	2.85904e-192	0.999993	-3.57997e-05	0.227609	0.616614	0.625	2.85904e-192
0.01	0.005	0.5	0.0002	0.05	1	-0.553749	-0.447172	0.035	0.998633	-0.00376545	1.79405e-10	0.768275	0.75	9.83201e-108	0.998633	-0.00242843	1.79405e-10	0.49548	0.5	9.83201e-108
0.01	0.005	0.5	0.0005	0.02	1	0.132352	0.117315	0.02	0.999475	0.000517731	0.089935	0.733995	0.75	4.07377e-123	0.999475	0.000342836	0.089935	0.486044	0.5	4.07377e-123
0.01	0.005	0.5	0.001	0.01	1	0.951231	0.887721	0.011	0.999734	0.00290974	9.68837e-22	0.73417	0.75	5.13275e-134	0.999734	0.00191463	9.68837e-22	0.48309	0.5	5.13275e-134
0.01	0.005	0.5	0.002	0.005	1	0.975924	0.946468	0.008	0.999847	0.00246531	4.23786e-24	0.743734	0.75	5.82046e-143	0.999847	0.00164293	4.23786e-24	0.495638	0.5	5.82046e-143
0.01	0.005	0.5	0.005	0.002	1	0.137122	0.136697	0.007	0.999958	0.000139537	0.110321	0.747102	0.75	7.603e-164	0.999958	9.185e-05	0.110321	0.491778	0.5	7.603e-164
0.01	0.005	0.5	0.01	0.001	1	-0.962139	-0.958469	0.007	0.999965	-0.00116172	1.57359e-23	0.747911	0.75	1.46164e-166	0.999965	-0.000765661	1.57359e-23	0.492929	0.5	1.46164e-166
0.01	0.01	1	0.0002	0.05	1	0.281019	0.222025	0.081	0.993956	0.00438265	0.000140237	0.781121	0.75	7.52197e-84	0.993956	0.00215302	0.000140237	0.383733	0.375	7.52197e-84
0.01	0.01	1	0.0005	0.02	1	0.794139	0.734705	0.046	0.997086	0.0100602	9.78069e-24	0.704187	0.75	1.42631e-95	0.997086	0.000.0005133	9.78069e-24	0.349997	0.375	1.42631e-95
0.01	0.01	1	0.001	0.01	1	0.824222	0.80449	0.03	0.997428	0.00729218	1.18739e-16	0.750351	0.75	1.39565e-97	0.997428	0.00357402	1.18739e-16	0.367759	0.375	1.39565e-97
0.01	0.01	1	0.002	0.005	1	2.12025	2.08037	0.009	0.999229	0.0130395	4.35458e-48	0.741471	0.75	6.11388e-117	0.999229	0.00647977	4.35458e-48	0.368461	0.375	6.11388e-117
0.01	0.01	1	0.005	0.002	1	-2.0156	-1.99375	0.03	0.999839	-0.00844245	3.32879e-58	0.757222	0.75	3.98473e-142	0.999839	-0.00415113	3.32879e-58	0.372324	0.375	3.98473e-142
0.01	0.01	1	0.01	0.001	1	0.251299	0.20.00055562355821	0.013	0.999899	0.000829841	2.80013e-08	0.741353	0.75	1.45691e-149	0.999899	0.000404539	2.80013e-08	0.361402	0.375	1.45691e-149
0.01	0.02	2	0.0002	0.05	1	0.541085	0.46957	0.179	0.977009	0.0234986	3.72344e-17	0.780323	0.75	2.2308e-62	0.977009	0.00706803	3.72344e-17	0.234709	0.25	2.2308e-62
0.01	0.02	2	0.0005	0.02	1	-1.86421	-1.7404	0.21	0.993131	-0.0558598	2.65849e-57	0.786502	0.75	8.54178e-82	0.993131	-0.0184636	2.65849e-57	0.259966	0.25	8.54178e-82
0.01	0.02	2	0.001	0.01	1	-0.133624	-0.128519	0.099	0.995222	-0.00256138	0.00802137	0.757338	0.75	1.25703e-87	0.995222	-0.000817867	0.00802137	0.241823	0.25	1.25703e-87
0.01	0.02	2	0.002	0.005	1	-2.09917	-2.06984	0.111	0.997777	-0.0325581	1.11943e-58	0.772854	0.75	6.33339e-100	0.997777	-0.0108073	1.11943e-58	0.256541	0.25	6.33339e-100
0.01	0.02	2	0.005	0.002	1	-1.03844	-1.02753	0.061	0.999447	-0.0108001	5.79947e-47	0.75236	0.75	2.87129e-122	0.999447	-0.00350537	5.79947e-47	0.244193	0.25	2.87129e-122
0.01	0.02	2	0.01	0.001	1	0.118368	0.11755	0.027	0.999525	0.000754942	0.0109324	0.740454	0.75	1.01721e-124	0.999525	0.00024806	0.0109324	0.243299	0.25	1.01721e-124
0.01	0.05	5	0.0002	0.05	1	1.01274	0.826187	0.437	0.899542	0.124401	2.13953e-39	0.787237	0.75	1.15266e-38	0.899542	0.0205212	2.13953e-39	0.129862	0.125	1.15266e-38
0.01	0.05	5	0.0005	0.02	1	-0.953087	-0.905067	0.46	0.947595	-0.0768206	7.14926e-36	0.780964	0.75	3.92625e-49	0.947595	-0.0122475	7.14926e-36	0.124509	0.125	3.92625e-49
0.01	0.05	5	0.001	0.01	1	2.09393	2.07116	0.095	0.977299	0.110229	4.79452e-63	0.704881	0.75	1.39414e-62	0.977299	0.018773	4.79452e-63	0.120047	0.125	1.39414e-62
0.01	0.05	5	0.002	0.005	1	-1.19376	-1.19135	0.279	0.986222	-0.0516692	4.23315e-47	0.713337	0.75	1.31479e-70	0.986222	-0.00860754	4.23315e-47	0.118834	0.125	1.31479e-70
0.01	0.05	5	0.005	0.002	1	-1.17705	-1.15913	0.156	0.996055	-0.0287039	8.69513e-48	0.727536	0.75	1.05177e-90	0.996055	-0.00483811	8.69513e-48	0.122628	0.125	1.05177e-90
0.01	0.05	5	0.01	0.001	1	-1.48884	-1.48402	0.119	0.997195	-0.0256273	3.69219e-50	0.713083	0.75	3.45489e-96	0.997195	-0.00418213	3.69219e-50	0.116368	0.125	3.45489e-96
0.001	0.0002	0.2	0.0002	0.05	2	0.80249	0.465898	0.004	0.999725	0.000739875	0.00143908	0.752424	0.75	1.62146e-133	0.999725	0.000616267	0.00143908	0.626719	0.625	1.62146e-133
0.001	0.0002	0.2	0.0005	0.02	2	-0.562909	-0.415437	0.004	0.999915	-0.000122179	0.330063	0.752184	0.75	2.85374e-152	0.999915	-0.000101617	0.330063	0.625591	0.625	2.85374e-152
0.001	0.0002	0.2	0.001	0.01	2	1.22287	1.04948	0.002	0.999952	0.00062491	2.37215e-09	0.743932	0.75	1.12206e-161	0.999952	0.00051998	2.37215e-09	0.619017	0.625	1.12206e-161
0.001	0.0002	0.2	0.002	0.005	2	-0.469612	-0.433845	0.003	0.999982	-0.000215679	0.000332051	0.750439	0.75	3.61064e-177	0.999982	-0.000179697	0.000332051	0.625242	0.625	3.61064e-177
0.001	0.0002	0.2	0.005	0.002	2	0.229043	0.221565	0.002	0.999978	0.00011148	0.0782942	0.747792	0.75	2.72896e-174	0.999978	9.28337e-05	0.0782942	0.622717	0.625	2.72896e-174
0.001	0.0002	0.2	0.01	0.001	2	-0.955654	-0.92626	0.002	0.99999	-0.000228643	7.38603e-07	0.747851	0.75	7.61637e-187	0.99999	-0.000190651	7.38603e-07	0.623585	0.625	7.61637e-187
0.001	0.0005	0.5	0.0002	0.05	2	1.01209	0.843919	0.02	0.997861	0.00581438	5.81789e-14	0.758682	0.75	1.5158e-100	0.997861	0.00386567	5.81789e-14	0.504406	0.5	1.5158e-100
0.001	0.0005	0.5	0.0005	0.02	2	1.54796	1.38471	0.01	0.999669	0.00661166	5.07191e-40	0.751763	0.75	1.63629e-130	0.999669	0.00440828	5.07191e-40	0.501233	0.5	1.63629e-130
0.001	0.0005	0.5	0.001	0.01	2	1.88992	1.79112	0.007	0.999714	0.00666429	3.38557e-43	0.73264	0.75	6.84787e-133	0.999714	0.00446062	3.38557e-43	0.49038	0.5	6.84787e-133
0.001	0.0005	0.5	0.002	0.005	2	-0.170094	-0.167074	0.012	0.999821	-0.000323964	0.0758933	0.751086	0.75	2.04144e-140	0.999821	-0.00021493	0.0758933	0.4983	0.5	2.04144e-140
0.001	0.0005	0.5	0.005	0.002	2	0.763799	0.748655	0.006	0.999944	0.00117818	1.51523e-18	0.752421	0.75	3.34377e-159	0.999944	0.000784592	1.51523e-18	0.501061	0.5	3.34377e-159
0.001	0.0005	0.5	0.01	0.001	2	-0.974636	-0.971242	0.007	0.999946	-0.00117292	7.85678e-19	0.749182	0.75	1.21697e-159	0.999946	-0.000779901	7.85678e-19	0.498148	0.5	1.21697e-159
0.001	0.001	1	0.0002	0.05	2	1.07623	0.895539	0.062	0.99445	0.018874	1.42789e-32	0.679751	0.75	3.20922e-85	0.99445	0.00970657	1.42789e-32	0.349585	0.375	3.20922e-85
0.001	0.001	1	0.0005	0.02	2	-1.00393	-0.926223	0.077	0.997573	-0.0135646	7.46075e-32	0.759591	0.75	1.6376e-98	0.997573	-0.0067294	7.46075e-32	0.376833	0.375	1.6376e-98
0.001	0.001	1	0.001	0.01	2	1.28598	1.25114	0.027	0.997351	0.0131823	3.67783e-32	0.698545	0.75	4.19739e-97	0.997351	0.00669738	3.67783e-32	0.354903	0.375	4.19739e-97
0.001	0.001	1	0.002	0.005	2	0.809674	0.803867	0.025	0.999371	0.00621137	1.59755e-29	0.745584	0.75	3.33355e-120	0.999371	0.00310933	1.59755e-29	0.37323	0.375	3.33355e-120
0.001	0.001	1	0.005	0.002	2	1.2208	1.228	0.012	0.999789	0.00551193	2.67883e-41	0.751644	0.75	9.42964e-138	0.999789	0.00274842	2.67883e-41	0.374793	0.375	9.42964e-138
0.001	0.001	1	0.01	0.001	2	-1.43176	-1.4206	0.022	0.999923	-0.00485047	1.06736e-52	0.752645	0.75	4.92236e-154	0.999923	-0.00241476	1.06736e-52	0.374697	0.375	4.92236e-154
0.001	0.002	2	0.0002	0.05	2	2.12991	1.82374	0.081	0.965035	0.0977534	3.53859e-55	0.643895	0.75	1.22355e-55	0.965035	0.0339492	3.53859e-55	0.223621	0.25	1.22355e-55
0.001	0.002	2	0.0005	0.02	2	-0.907703	-0.815201	0.188	0.989364	-0.0303827	3.97203e-32	0.801301	0.75	9.10658e-75	0.989364	-0.00984529	3.97203e-32	0.259655	0.25	9.10658e-75
0.001	0.002	2	0.001	0.01	2	0.174566	0.168978	0.104	0.996241	0.00542055	7.46861e-09	0.755058	0.75	1.75706e-91	0.996241	0.00173086	7.46861e-09	0.241101	0.25	1.75706e-91
0.001	0.002	2	0.002	0.005	2	-0.495975	-0.487677	0.092	0.997283	-0.00957336	9.49811e-22	0.755215	0.75	1.05866e-96	0.997283	-0.00314293	9.49811e-22	0.247937	0.25	1.05866e-96
0.001	0.002	2	0.005	0.002	2	-0.754945	-0.742377	0.066	0.998974	-0.00929904	2.51309e-33	0.759725	0.75	2.37382e-112	0.998974	-0.00301042	2.51309e-33	0.245949	0.25	2.37382e-112
0.001	0.002	2	0.01	0.001	2	-0.310181	-0.307384	0.041	0.99929	-0.00281873	1.34521e-11	0.7388	0.75	2.88431e-118	0.99929	-0.00094265	1.34521e-11	0.247072	0.25	2.88431e-118
0.001	0.005	5	0.0002	0.05	2	0.953963	0.810531	0.484	0.809406	0.103895	7.68826e-32	0.591656	0.75	2.36841e-28	0.809406	0.019217	7.68826e-32	0.109436	0.125	2.36841e-28
0.001	0.005	5	0.0005	0.02	2	1.87278	1.7322	0.204	0.882695	0.187164	5.45194e-53	0.690919	0.75	3.60498e-36	0.882695	0.0290304	5.45194e-53	0.107167	0.125	3.60498e-36
0.001	0.005	5	0.001	0.01	2	-0.884345	-0.833652	0.323	0.963211	-0.0511918	3.66316e-29	0.799807	0.75	8.03773e-55	0.963211	-0.00921202	3.66316e-29	0.143926	0.125	8.03773e-55
0.001	0.005	5	0.002	0.005	2	1.00953	1.00195	0.168	0.977371	0.0517514	3.33864e-38	0.749494	0.75	1.23917e-62	0.977371	0.00798453	3.33864e-38	0.115637	0.125	1.23917e-62
0.001	0.005	5	0.005	0.002	2	-0.0540631	-0.0543589	0.142	0.994314	-0.00370866	0.000424684	0.741849	0.75	7.82921e-85	0.994314	-0.000610138	0.000424684	0.122047	0.125	7.82921e-85
0.001	0.005	5	0.01	0.001	2	-0.552022	-0.552794	0.109	0.996708	-0.0118428	9.80224e-25	0.748487	0.75	1.29086e-93	0.996708	-0.00197998	9.80224e-25	0.125138	0.125	1.29086e-93
0.01	0.002	0.2	0.0002	0.05	2	0.481457	0.380338	0.005	0.999839	0.000499421	0.00419088	0.744427	0.75	3.7987e-142	0.999839	0.000413821	0.00419088	0.616832	0.625	3.7987e-142
0.01	0.002	0.2	0.0005	0.02	2	-0.281633	-0.249791	0.005	0.99991	-0.00018902	0.141294	0.748968	0.75	1.71193e-151	0.99991	-0.000156465	0.141294	0.61997	0.625	1.71193e-151
0.01	0.002	0.2	0.001	0.01	2	1.43541	1.34624	0.002	0.999892	0.000713588	1.69609e-06	0.738209	0.75	1.39085e-148	0.999892	0.000590785	1.69609e-06	0.611169	0.625	1.39085e-148
0.01	0.002	0.2	0.002	0.005	2	0.0949701	0.0919997	0.003	0.999977	0.000142346	0.0279953	0.743877	0.75	1.40948e-173	0.999977	0.000118096	0.0279953	0.617149	0.625	1.40948e-173
0.01	0.002	0.2	0.005	0.002	2	-0.439413	-0.435062	0.002	0.999991	-0.00015266	0.000287452	0.744476	0.75	2.20841e-188	0.999991	-0.000126595	0.000287452	0.617368	0.625	2.20841e-188
0.01	0.002	0.2	0.01	0.001	2	-0.81991	-0.812737	0.002	0.999994	-0.000207058	9.21797e-09	0.742593	0.75	1.43557e-195	0.999994	-0.000171806	9.21797e-09	0.616167	0.625	1.43557e-195
0.01	0.005	0.5	0.0002	0.05	2	0.867927	0.744314	0.021	0.998628	0.00472993	1.40265e-14	0.7444	0.75	1.11405e-107	0.998628	0.00311502	1.40265e-14	0.490245	0.5	1.11405e-107
0.01	0.005	0.5	0.0005	0.02	2	1.37983	1.26603	0.011	0.999487	0.00530263	5.64357e-28	0.747752	0.75	1.75482e-123	0.999487	0.00350185	5.64357e-28	0.493815	0.5	1.75482e-123
0.01	0.005	0.5	0.001	0.01	2	1.84562	1.76057	0.007	0.999677	0.00642576	1.7332e-40	0.727752	0.75	6.73482e-131	0.999677	0.00426188	1.7332e-40	0.48268	0.5	6.73482e-131
0.01	0.005	0.5	0.002	0.005	2	-0.0920333	-0.0905123	0.012	0.999821	-0.00021924	0.22599	0.748815	0.75	2.18065e-140	0.999821	-0.000143964	0.22599	0.491711	0.5	2.18065e-140
0.01	0.005	0.5	0.005	0.002	2	0.913857	0.901134	0.005	0.999951	0.00147943	1.72833e-25	0.745145	0.75	3.01058e-161	0.999951	0.000976295	1.72833e-25	0.491731	0.5	3.01058e-161
0.01	0.005	0.5	0.01	0.001	2	-0.930388	-0.925178	0.007	0.999972	-0.000992053	1.77672e-22	0.745855	0.75	4.03804e-170	0.999972	-0.000653594	1.77672e-22	0.491391	0.5	4.03804e-170
0.01	0.01	1	0.0002	0.05	2	1.14839	0.975858	0.058	0.991273	0.0191446	3.38245e-27	0.671859	0.75	6.03515e-78	0.991273	0.00970463	3.38245e-27	0.340574	0.375	6.03515e-78
0.01	0.01	1	0.0005	0.02	2	-1.03833	-0.968458	0.073	0.998319	-0.0121887	2.99098e-34	0.752265	0.75	2.04591e-104	0.998319	-0.00596908	2.99098e-34	0.368401	0.375	2.04591e-104
0.01	0.01	1	0.001	0.01	2	1.25592	1.22544	0.026	0.999163	0.0116247	4.5275e-45	0.701291	0.75	1.24904e-115	0.999163	0.00582119	4.5275e-45	0.351179	0.375	1.24904e-115
0.01	0.01	1	0.002	0.005	2	0.704364	0.700387	0.024	0.999472	0.0048908	8.47903e-26	0.740251	0.75	5.15395e-123	0.999472	0.00241477	8.47903e-26	0.36549	0.375	5.15395e-123
0.01	0.01	1	0.005	0.002	2	1.20985	1.21843	0.012	0.999731	0.00540754	1.62227e-37	0.744363	0.75	7.0921e-134	0.999731	0.00266171	1.62227e-37	0.366391	0.375	7.0921e-134
0.01	0.01	1	0.01	0.001	2	-1.8334	-1.81829	0.022	0.999911	-0.00588412	1.87777e-56	0.750236	0.75	1.27261e-151	0.999911	-0.00288609	1.87777e-56	0.367982	0.375	1.27261e-151
0.01	0.02	2	0.0002	0.05	2	2.17509	1.92671	0.076	0.971579	0.0913672	2.19288e-56	0.64422	0.75	5.71076e-59	0.971579	0.0311231	2.19288e-56	0.219446	0.25	5.71076e-59
0.01	0.02	2	0.0005	0.02	2	-0.934019	-0.856416	0.176	0.990753	-0.0301083	2.29232e-33	0.814727	0.75	5.13028e-77	0.990753	-0.00959549	2.29232e-33	0.259653	0.25	5.13028e-77
0.01	0.02	2	0.001	0.01	2	0.233595	0.228497	0.093	0.996372	0.00458882	6.56145e-07	0.780212	0.75	4.74041e-92	0.996372	0.00144763	6.56145e-07	0.246133	0.25	4.74041e-92
0.01	0.02	2	0.002	0.005	2	-0.481599	-0.477129	0.084	0.998011	-0.00789877	4.84933e-21	0.751367	0.75	1.04171e-101	0.998011	-0.00255466	4.84933e-21	0.243011	0.25	1.04171e-101
0.01	0.02	2	0.005	0.002	2	-0.763159	-0.752739	0.06	0.999149	-0.00843059	3.06733e-33	0.758779	0.75	2.33258e-115	0.999149	-0.0026987	3.06733e-33	0.242891	0.25	2.33258e-115
0.01	0.02	2	0.01	0.001	2	-0.334443	-0.33196	0.037	0.999391	-0.00238273	1.76636e-10	0.728151	0.75	1.01407e-120	0.999391	-0.0007844	1.76636e-10	0.239709	0.25	1.01407e-120
0.01	0.05	5	0.0002	0.05	2	0.871691	0.759492	0.432	0.892161	0.0850584	4.73548e-33	0.646912	0.75	1.59456e-37	0.892161	0.0152835	4.73548e-33	0.116238	0.125	1.59456e-37
0.01	0.05	5	0.0005	0.02	2	1.69649	1.61361	0.19	0.963515	0.143391	3.64136e-61	0.762481	0.75	5.91802e-55	0.963515	0.0221324	3.64136e-61	0.117689	0.125	5.91802e-55
0.01	0.05	5	0.001	0.01	2	-0.759752	-0.727133	0.279	0.973901	-0.0408609	3.02026e-28	0.789231	0.75	2.43662e-60	0.973901	-0.00701343	3.02026e-28	0.135465	0.125	2.43662e-60
0.01	0.05	5	0.002	0.005	2	0.827918	0.821394	0.152	0.984883	0.0373442	6.08472e-36	0.718849	0.75	4.06743e-69	0.984883	0.00569311	6.08472e-36	0.109588	0.125	4.06743e-69
0.01	0.05	5	0.005	0.002	2	-0.0043871	-0.00440571	0.118	0.992662	0.000715839	0.511632	0.704805	0.75	9.8493e-81	0.992662	0.000116548	0.511632	0.114751	0.125	9.8493e-81
0.01	0.05	5	0.01	0.001	2	-0.654756	-0.65504	0.094	0.997237	-0.010815	5.58143e-25	0.738939	0.75	1.97277e-96	0.997237	-0.00177612	5.58143e-25	0.121354	0.125	1.97277e-96
0.001	0.0002	0.2	0.0002	0.05	3	1.12843	0.65789	0.003	0.999738	0.00092231	6.05612e-05	0.747738	0.75	2.73588e-134	0.999738	0.000768563	6.05612e-05	0.623091	0.625	2.73588e-134
0.001	0.0002	0.2	0.0005	0.02	3	0.687222	0.497441	0.003	0.999896	0.000491756	0.000554649	0.744962	0.75	4.25331e-149	0.999896	0.000410428	0.000554649	0.621759	0.625	4.25331e-149
0.001	0.0002	0.2	0.001	0.01	3	0.40096	0.32631	0.003	0.99994	0.000187132	0.0765643	0.750407	0.75	6.00012e-158	0.99994	0.000155642	0.0765643	0.62413	0.625	6.00012e-158
0.001	0.0002	0.2	0.002	0.005	3	0.610577	0.572422	0.002	0.999973	0.000280131	0.000124935	0.748455	0.75	4.97771e-171	0.999973	0.000233604	0.000124935	0.624143	0.625	4.97771e-171
0.001	0.0002	0.2	0.005	0.002	3	1.20844	1.13006	0.001	0.999985	0.000359565	9.88292e-10	0.747329	0.75	1.54157e-180	0.999985	0.000299457	9.88292e-10	0.622399	0.625	1.54157e-180
0.001	0.0002	0.2	0.01	0.001	3	0.859419	0.830034	0.001	0.999989	0.000271788	4.83416e-08	0.749682	0.75	4.15217e-185	0.999989	0.000226117	4.83416e-08	0.623707	0.625	4.15217e-185
0.001	0.0005	0.5	0.0002	0.05	3	-1.4193	-1.07232	0.044	0.99772	-0.00917538	1.2686e-22	0.76109	0.75	1.62529e-99	0.99772	-0.00605396	1.2686e-22	0.502171	0.5	1.62529e-99
0.001	0.0005	0.5	0.0005	0.02	3	-1.35633	-1.18301	0.03	0.9995	-0.00583343	1.66585e-30	0.75717	0.75	6.75229e-124	0.9995	-0.00390404	1.66585e-30	0.506738	0.5	6.75229e-124
0.001	0.0005	0.5	0.001	0.01	3	-1.53287	-1.44376	0.023	0.999711	-0.00503646	2.29325e-34	0.74671	0.75	1.08398e-132	0.999711	-0.00336345	2.29325e-34	0.498668	0.5	1.08398e-132
0.001	0.0005	0.5	0.002	0.005	3	1.14287	1.12607	0.007	0.999815	0.00314577	7.42846e-28	0.742121	0.75	7.23985e-140	0.999815	0.0021027	7.42846e-28	0.49605	0.5	7.23985e-140
0.001	0.0005	0.5	0.005	0.002	3	2.11142	2.08746	0.003	0.999952	0.00359275	7.20844e-51	0.749391	0.75	1.25592e-161	0.999952	0.00239615	7.20844e-51	0.499799	0.5	1.25592e-161
0.001	0.0005	0.5	0.01	0.001	3	-0.635596	-0.6282	0.006	0.999967	-0.000697392	1.89693e-13	0.7525	0.75	1.91192e-167	0.999967	-0.000464886	1.89693e-13	0.501622	0.5	1.91192e-167
0.001	0.001	1	0.0002	0.05	3	1.45384	1.14796	0.048	0.995343	0.0264419	2.72667e-41	0.766281	0.75	4.849e-88	0.995343	0.0129879	2.72667e-41	0.376387	0.375	4.849e-88
0.001	0.001	1	0.0005	0.02	3	-0.170109	-0.155131	0.062	0.996539	-0.00238171	0.00517359	0.782935	0.75	8.26982e-93	0.996539	-0.00117202	0.00517359	0.385275	0.375	8.26982e-93
0.001	0.001	1	0.001	0.01	3	1.76845	1.6907	0.02	0.99875	0.0173634	1.97161e-49	0.7418	0.75	3.53814e-109	0.99875	0.00857037	1.97161e-49	0.366144	0.375	3.53814e-109
0.001	0.001	1	0.002	0.005	3	-1.35314	-1.32689	0.044	0.999328	-0.00898288	1.17727e-38	0.751213	0.75	3.89926e-119	0.999328	-0.0045031	1.17727e-38	0.376582	0.375	3.89926e-119
0.001	0.001	1	0.005	0.002	3	-0.226168	-0.226285	0.021	0.999763	-0.000862155	7.56305e-05	0.746373	0.75	6.3369e-136	0.999763	-0.000428181	7.56305e-05	0.370679	0.375	6.3369e-136
0.001	0.001	1	0.01	0.001	3	-0.813625	-0.817713	0.018	0.999906	-0.00288364	2.89356e-34	0.752529	0.75	9.61755e-151	0.999906	-0.00143491	2.89356e-34	0.374461	0.375	9.61755e-151
0.001	0.002	2	0.0002	0.05	3	-0.108917	-0.0922904	0.218	0.980913	-0.00550503	0.00360702	0.732776	0.75	2.27713e-65	0.980913	-0.00182445	0.00360702	0.242852	0.25	2.27713e-65
0.001	0.002	2	0.0005	0.02	3	-0.0214142	-0.0194023	0.176	0.981522	0.000617297	0.694929	0.637942	0.75	6.85792e-66	0.981522	0.000209203	0.694929	0.216199	0.25	6.85792e-66
0.001	0.002	2	0.001	0.01	3	0.581021	0.551982	0.092	0.994965	0.0148027	1.04711e-25	0.726778	0.75	8.6985e-87	0.994965	0.00490871	1.04711e-25	0.241007	0.25	8.6985e-87
0.001	0.002	2	0.002	0.005	3	-0.710504	-0.684023	0.093	0.997653	-0.0127002	1.10886e-30	0.755219	0.75	4.73548e-99	0.997653	-0.0042031	1.10886e-30	0.249937	0.25	4.73548e-99
0.001	0.002	2	0.005	0.002	3	1.52747	1.52562	0.027	0.999018	0.0177773	1.67415e-54	0.726728	0.75	4.65454e-113	0.999018	0.00590983	1.67415e-54	0.241591	0.25	4.65454e-113
0.001	0.002	2	0.01	0.001	3	0.350438	0.351114	0.028	0.999473	0.00222765	7.82552e-10	0.767629	0.75	4.82084e-123	0.999473	0.000736779	7.82552e-10	0.253887	0.25	4.82084e-123
0.001	0.005	5	0.0002	0.05	3	1.05345	0.938126	0.433	0.858024	0.113758	1.3538e-35	0.675158	0.75	4.26704e-33	0.858024	0.0215655	1.3538e-35	0.127992	0.125	4.26704e-33
0.001	0.005	5	0.0005	0.02	3	-1.12069	-1.03518	0.501	0.931712	-0.117702	1.05913e-37	0.974899	0.75	7.10401e-45	0.931712	-0.0160609	1.05913e-37	0.133028	0.125	7.10401e-45
0.001	0.005	5	0.001	0.01	3	1.51605	1.47758	0.191	0.951	0.113144	1.15943e-50	0.72357	0.75	3.26351e-50	0.951	0.0182478	1.15943e-50	0.116697	0.125	3.26351e-50
0.001	0.005	5	0.002	0.005	3	-0.688447	-0.675167	0.269	0.983466	-0.0306044	4.90868e-29	0.724178	0.75	1.1211e-67	0.983466	-0.00525613	4.90868e-29	0.124373	0.125	1.1211e-67
0.001	0.005	5	0.005	0.002	3	-0.585017	-0.576372	0.162	0.988609	-0.0167314	2.18203e-19	0.713336	0.75	1.1503e-73	0.988609	-0.00278906	2.18203e-19	0.118911	0.125	1.1503e-73
0.001	0.005	5	0.01	0.001	3	-0.461044	-0.460385	0.113	0.996556	-0.00976903	1.07674e-19	0.749859	0.75	6.86219e-93	0.996556	-0.00159938	1.07674e-19	0.122767	0.125	6.86219e-93
0.01	0.002	0.2	0.0002	0.05	3	0.926063	0.737394	0.005	0.999829	0.00099937	1.78495e-07	0.740266	0.75	3.87764e-141	0.999829	0.000828043	1.78495e-07	0.613358	0.625	3.87764e-141
0.01	0.002	0.2	0.0005	0.02	3	0.340112	0.297875	0.004	0.999919	0.000215146	0.0736181	0.735492	0.75	3.75171e-153	0.999919	0.000178731	0.0736181	0.611003	0.625	3.75171e-153
0.01	0.002	0.2	0.001	0.01	3	0.155203	0.142093	0.003	0.999966	4.20118e-05	0.593417	0.74571	0.75	6.60093e-167	0.999966	3.47721e-05	0.593417	0.617206	0.625	6.60093e-167
0.01	0.002	0.2	0.002	0.005	3	0.639028	0.617501	0.002	0.999973	0.000200949	0.00463357	0.744084	0.75	5.24052e-171	0.999973	0.00016658	0.00463357	0.61682	0.625	5.24052e-171
0.01	0.002	0.2	0.005	0.002	3	1.35884	1.33339	0.001	0.999991	0.000406854	1.50919e-15	0.743311	0.75	3.8126e-188	0.999991	0.000337165	1.50919e-15	0.615992	0.625	3.8126e-188
0.01	0.002	0.2	0.01	0.001	3	1.62128	1.60679	0.001	0.999996	0.000358815	8.45263e-21	0.744239	0.75	2.19003e-200	0.999996	0.000297166	8.45263e-21	0.616368	0.625	2.19003e-200
0.01	0.005	0.5	0.0002	0.05	3	-1.30203	-1.03896	0.044	0.998847	-0.00829539	2.02072e-28	0.766986	0.75	1.77346e-110	0.998847	-0.00542534	2.02072e-28	0.501623	0.5	1.77346e-110
0.01	0.005	0.5	0.0005	0.02	3	-1.22205	-1.09766	0.029	0.999388	-0.00592419	5.37814e-28	0.76403	0.75	1.22133e-120	0.999388	-0.00392912	5.37814e-28	0.50673	0.5	1.22133e-120
0.01	0.005	0.5	0.001	0.01	3	-1.4133	-1.35437	0.021	0.999621	-0.00446031	1.45471e-27	0.74318	0.75	2.48281e-128	0.999621	-0.0029489	1.45471e-27	0.491348	0.5	2.48281e-128
0.01	0.005	0.5	0.002	0.005	3	0.974798	0.959259	0.008	0.999858	0.00240128	1.77691e-24	0.740245	0.75	3.73667e-144	0.999858	0.0015918	1.77691e-24	0.490707	0.5	3.73667e-144
0.01	0.005	0.5	0.005	0.002	3	2.00168	1.9887	0.003	0.999947	0.00316026	1.34363e-45	0.746897	0.75	4.58039e-160	0.999947	0.00208333	1.34363e-45	0.492375	0.5	4.58039e-160
0.01	0.005	0.5	0.01	0.001	3	-0.583597	-0.580386	0.006	0.999968	-0.000627496	2.79331e-12	0.745606	0.75	2.99155e-168	0.999968	-0.000414303	2.79331e-12	0.492286	0.5	2.99155e-168
0.01	0.01	1	0.0002	0.05	3	1.47109	1.20262	0.046	0.992881	0.02474	9.7584e-33	0.781393	0.75	3.2172e-81	0.992881	0.0119916	9.7584e-33	0.378744	0.375	3.2172e-81
0.01	0.01	1	0.0005	0.02	3	-0.205018	-0.189256	0.059	0.998552	-0.00237947	2.40454e-05	0.773825	0.75	8.1895e-107	0.998552	-0.00115459	2.40454e-05	0.375482	0.375	8.1895e-107
0.01	0.01	1	0.001	0.01	3	1.71906	1.65404	0.02	0.998352	0.0158518	7.52009e-43	0.733627	0.75	9.85614e-105	0.998352	0.00771217	7.52009e-43	0.356921	0.375	9.85614e-105
0.01	0.01	1	0.002	0.005	3	-1.20367	-1.18754	0.04	0.999391	-0.00788691	2.08933e-36	0.749636	0.75	9.88656e-121	0.999391	-0.00390649	2.08933e-36	0.371304	0.375	9.88656e-121
0.01	0.01	1	0.005	0.002	3	-0.146384	-0.146461	0.019	0.999675	-0.000519438	0.032809	0.739028	0.75	8.32455e-131	0.999675	-0.000254629	0.032809	0.362272	0.375	8.32455e-131
0.01	0.01	1	0.01	0.001	3	-0.699089	-0.699624	0.016	0.999849	-0.00214871	5.13212e-21	0.744221	0.75	3.55463e-143	0.999849	-0.00105529	5.13212e-21	0.365507	0.375	3.55463e-143
0.01	0.02	2	0.0002	0.05	3	0.00277421	0.00241365	0.198	0.965179	0.00147944	0.565194	0.752642	0.75	1.0508e-55	0.965179	0.000481135	0.565194	0.24477	0.25	1.0508e-55
0.01	0.02	2	0.0005	0.02	3	-0.0152355	-0.0140588	0.161	0.989923	-0.000974684	0.422548	0.668721	0.75	1.23349e-75	0.989923	-0.000323473	0.422548	0.221931	0.25	1.23349e-75
0.01	0.02	2	0.001	0.01	3	0.484378	0.464899	0.088	0.995931	0.0102193	4.4375e-19	0.742282	0.75	3.28135e-90	0.995931	0.00333058	4.4375e-19	0.241918	0.25	3.28135e-90
0.01	0.02	2	0.002	0.005	3	-0.669848	-0.653402	0.083	0.99766	-0.0101978	2.08953e-25	0.744235	0.75	4.27088e-99	0.99766	-0.00332685	2.08953e-25	0.242792	0.25	4.27088e-99
0.01	0.02	2	0.005	0.002	3	1.56392	1.56338	0.023	0.999358	0.0162831	1.84273e-58	0.724632	0.75	7.1104e-120	0.999358	0.00531748	1.84273e-58	0.236639	0.25	7.1104e-120
0.01	0.02	2	0.01	0.001	3	0.345744	0.346738	0.025	0.999295	0.00235167	7.34281e-09	0.75719	0.75	2.21574e-118	0.999295	0.000766564	7.34281e-09	0.246818	0.25	2.21574e-118
0.01	0.05	5	0.0002	0.05	3	1.08961	1.00925	0.387	0.928512	0.106728	1.03315e-40	0.777595	0.75	3.87472e-44	0.928512	0.0192339	1.03315e-40	0.140133	0.125	3.87472e-44
0.01	0.05	5	0.0005	0.02	3	-1.04661	-0.983944	0.452	0.933688	-0.0962961	5.32439e-33	0.957208	0.75	2.39531e-45	0.933688	-0.0133971	5.32439e-33	0.133171	0.125	2.39531e-45
0.01	0.05	5	0.001	0.01	3	1.42636	1.40799	0.167	0.979797	0.0925447	2.1838e-57	0.752588	0.75	1.86317e-64	0.979797	0.0144579	2.1838e-57	0.117574	0.125	1.86317e-64
0.01	0.05	5	0.002	0.005	3	-0.596951	-0.591746	0.222	0.989028	-0.026235	4.3017e-30	0.734373	0.75	2.8715e-74	0.989028	-0.00438552	4.3017e-30	0.12276	0.125	2.8715e-74
0.01	0.05	5	0.005	0.002	3	-0.302697	-0.299603	0.129	0.992503	-0.00744752	4.43234e-09	0.71966	0.75	2.17566e-80	0.992503	-0.00122338	4.43234e-09	0.118216	0.125	2.17566e-80
0.01	0.05	5	0.01	0.001	3	-0.724655	-0.723732	0.104	0.997527	-0.0135842	5.0292e-32	0.748805	0.75	3.29462e-98	0.997527	-0.00218444	5.0292e-32	0.120414	0.125	3.29462e-98

## Sheet: Simulation Scheme 4
Input information								Significance and sensitivity				Regression model: fG = a + b × f; direction H3-> H2						Regression model: fHom = a + b × f; direction H3 -> H2						Regression model: fHom = a + b × f; direction H2 -> H3
T3 (1/μ Generations)	Ne (1/μ)	Ne/T3	Tgf/T2	T2/T3	Tgf/T3	Replicate	Diploid	Z-score of d (f = 0)	Z-score of fHom (f = 0)	MF80 (H3 -> H2)	MF80 (H2 -> H3)	r2 of model	a	p-value for a	b	b predictor	p-value of b	r2 of model	a	p-value for a	b	b predictor	p-value of b	r2 of model	a	p-value for a	b	b predictor	p-value of b
0.001	0.0002	0.2	0.25	0.1	0.025	1	Same loci	-2.14708	-1.65882	0.001	0.013	0.999992	-0.000178216	0.000696359	0.983011	0.975	5.34587e-190	0.999992	-0.000160545	0.000696359	0.885541	0.8125	5.34587e-190	0.974066	-0.00085825	2.56771e-06	0.0576181	0.0625	1.92553e-60
0.001	0.0002	0.2	0.5	0.5	0.25	1	Same loci	-0.429601	-0.407113	0.002	0.006	0.999987	-6.61288e-05	0.195387	0.792133	0.75	6.83206e-183	0.999987	-5.94637e-05	0.195387	0.712294	0.625	6.83206e-183	0.99372	-0.00209413	1.87832e-06	0.284122	0.208333	3.09659e-83
0.001	0.0002	0.2	0.75	0.9	0.675	1	Same loci	0.341516	0.337288	0.008	0.012	0.999931	0.000270417	2.46997e-06	0.354948	0.325	1.22975e-155	0.999931	0.000243109	2.46997e-06	0.319103	0.270833	1.22975e-155	0.999755	-8.72016e-06	0.893537	0.23145	0.1875	2.40811e-135
0.001	0.001	1	0.25	0.1	0.025	1	Same loci	-0.426852	-0.408294	0.01	0.32	0.999787	-0.0011718	1.91184e-05	0.980055	0.975	1.37204e-137	0.999787	-0.000701956	1.91184e-05	0.587093	0.4875	1.37204e-137	0.955371	-0.00102716	5.3791e-12	0.0323478	0.0375	1.02684e-51
0.001	0.001	1	0.5	0.5	0.25	1	Same loci	0.553278	0.536948	0.016	0.063	0.999532	0.00243482	5.74304e-12	0.767347	0.75	5.80202e-125	0.999532	0.0014537	5.74304e-12	0.45814	0.375	5.80202e-125	0.99126	0.000518254	0.0427575	0.14946	0.125	6.35075e-78
0.001	0.001	1	0.75	0.9	0.675	1	Same loci	0.457963	0.455496	0.054	0.081	0.997813	0.00294553	8.29327e-16	0.34338	0.325	3.49346e-100	0.997813	0.00179111	8.29327e-16	0.208801	0.1625	3.49346e-100	0.997129	0.00170786	6.36479e-19	0.148848	0.1125	8.21268e-96
0.001	0.005	5	0.25	0.1	0.025	1	Same loci	1.27335	1.15677	0.054	0.501	0.992021	0.0306934	6.78087e-31	0.979323	0.975	2.18212e-79	0.992021	0.00709676	6.78087e-31	0.226434	0.1625	2.18212e-79	0.183599	0.00712816	5.35108e-42	0.00654172	0.0125	0.000112673
0.001	0.005	5	0.5	0.5	0.25	1	Same loci	0.748067	0.694704	0.111	0.417	0.98243	0.0240358	2.62918e-22	0.722407	0.75	1.06128e-66	0.98243	0.00553527	2.62918e-22	0.166365	0.125	1.06128e-66	0.850831	0.00565758	2.27582e-30	0.0394268	0.0416667	2.66682e-32
0.001	0.005	5	0.75	0.9	0.675	1	Same loci	-0.995789	-0.932829	0.443	0.501	0.956502	-0.0378473	4.6414e-37	0.406971	0.325	3.96855e-52	0.956502	-0.00764272	4.6414e-37	0.0821819	0.0541667	3.96855e-52	0.902366	-0.00745339	8.07188e-35	0.0562304	0.0375	4.00753e-39
0.01	0.002	0.2	0.25	0.1	0.025	1	Same loci	0.28589	0.265483	0.001	0.007	0.999996	6.94275e-05	0.0458631	0.980179	0.975	2.40193e-202	0.999996	6.23796e-05	0.0458631	0.880677	0.8125	2.40193e-202	0.975242	-0.000782915	3.8741e-05	0.0626567	0.0625	3.45863e-61
0.01	0.002	0.2	0.5	0.5	0.25	1	Same loci	0.198056	0.195112	0.002	0.004	0.999988	7.33592e-05	0.135974	0.784878	0.75	7.44618e-184	0.999988	6.59523e-05	0.135974	0.705631	0.625	7.44618e-184	0.994472	-0.00187199	4.32021e-06	0.282481	0.208333	2.75903e-85
0.01	0.002	0.2	0.75	0.9	0.675	1	Same loci	-0.298236	-0.295998	0.01	0.014	0.999962	-0.000293415	6.50712e-11	0.34927	0.325	2.13743e-165	0.999962	-0.000263592	6.50712e-11	0.31377	0.270833	2.13743e-165	0.999674	-0.000540264	1.81089e-10	0.225798	0.1875	9.41607e-131
0.01	0.01	1	0.25	0.1	0.025	1	Same loci	0.924148	0.828798	0.007	0.181	0.999855	0.0022767	8.66202e-17	0.982205	0.975	7.86744e-144	0.999855	0.00135736	8.66202e-17	0.585585	0.4875	7.86744e-144	0.964682	0.00089726	7.4273e-10	0.037053	0.0375	1.77627e-55
0.01	0.01	1	0.5	0.5	0.25	1	Same loci	-0.00907886	-0.008937	0.019	0.07	0.999848	2.77972e-05	0.868725	0.759458	0.75	4.66591e-143	0.999848	1.65817e-05	0.868725	0.453034	0.375	4.66591e-143	0.99363	-0.000945982	3.15548e-05	0.148741	0.125	5.26638e-83
0.01	0.01	1	0.75	0.9	0.675	1	Same loci	1.78002	1.7448	0.025	0.039	0.998364	0.00959067	2.44841e-52	0.32568	0.325	7.47748e-105	0.998364	0.00578918	2.44841e-52	0.196589	0.1625	7.47748e-105	0.996402	0.00585796	1.93162e-52	0.13354	0.1125	3.48964e-92
0.01	0.05	5	0.25	0.1	0.025	1	Same loci	-1.4875	-1.37671	0.113	0.501	0.996128	-0.0342059	3.37403e-42	1.05463	0.975	5.23193e-91	0.996128	-0.00704879	3.37403e-42	0.217328	0.1625	5.23193e-91	0.441424	-0.00707118	7.86433e-40	0.0130967	0.0125	6.00513e-11
0.01	0.05	5	0.5	0.5	0.25	1	Same loci	-0.488041	-0.455666	0.134	0.501	0.994893	-0.0115024	1.05663e-18	0.758625	0.75	1.47884e-86	0.994893	-0.00246086	1.05663e-18	0.162303	0.125	1.47884e-86	0.907264	-0.00255251	1.28563e-18	0.0378799	0.0416667	5.95094e-40
0.01	0.05	5	0.75	0.9	0.675	1	Same loci	0.249078	0.238888	0.304	0.44	0.968586	0.00951217	2.57846e-14	0.312701	0.325	2.32438e-57	0.968586	0.00203617	2.57846e-14	0.0669367	0.0541667	2.32438e-57	0.875032	0.00151744	2.7448e-05	0.0501234	0.0375	3.76371e-35
0.001	0.0002	0.2	0.25	0.1	0.025	2	Same loci	1.54397	1.19341	0.001	0.005	0.999988	0.000163068	0.00836604	0.982418	0.975	3.03585e-184	0.999988	0.000146803	0.00836604	0.884426	0.8125	3.03585e-184	0.974509	-0.000672253	0.00022573	0.0598272	0.0625	1.01726e-60
0.001	0.0002	0.2	0.5	0.5	0.25	2	Same loci	1.55099	1.51423	0.001	0.003	0.999986	0.000526412	1.74172e-15	0.793145	0.75	7.62036e-182	0.999986	0.000473853	1.74172e-15	0.713954	0.625	7.62036e-182	0.994155	-0.0014236	0.000438489	0.281562	0.208333	2.18229e-84
0.001	0.0002	0.2	0.75	0.9	0.675	2	Same loci	-1.08827	-1.07564	0.012	0.017	0.999945	-0.000985693	9.39537e-33	0.355672	0.325	2.09243e-159	0.999945	-0.000886801	9.39537e-33	0.319988	0.270833	2.09243e-159	0.999591	-0.00124598	4.84527e-24	0.23016	0.1875	3.99801e-127
0.001	0.001	1	0.25	0.1	0.025	2	Same loci	-2.58331	-2.34074	0.017	0.437	0.999707	-0.0065635	4.76497e-34	0.978518	0.975	1.66823e-132	0.999707	-0.00395827	4.76497e-34	0.590118	0.4875	1.66823e-132	0.953846	-0.0043641	1.80158e-50	0.02898	0.0375	3.56049e-51
0.001	0.001	1	0.5	0.5	0.25	2	Same loci	1.39381	1.32463	0.011	0.042	0.999624	0.00585977	2.19113e-34	0.761837	0.75	1.7071e-128	0.999624	0.00353661	2.19113e-34	0.459799	0.375	1.7071e-128	0.992882	0.0027055	4.33698e-19	0.148272	0.125	3.20185e-81
0.001	0.001	1	0.75	0.9	0.675	2	Same loci	1.11822	1.11525	0.04	0.056	0.998128	0.00683691	4.07464e-39	0.337085	0.325	1.10104e-102	0.998128	0.00412789	4.07464e-39	0.203521	0.1625	1.10104e-102	0.996861	0.00432093	6.37775e-42	0.149396	0.1125	2.23198e-94
0.001	0.005	5	0.25	0.1	0.025	2	Same loci	-1.40535	-1.2724	0.133	0.501	0.992674	-0.0370139	5.71823e-37	0.991137	0.975	9.27356e-81	0.992674	-0.00804043	5.71823e-37	0.215302	0.1625	9.27356e-81	0.225296	-0.00799577	8.59859e-36	0.0103377	0.0125	1.47796e-05
0.001	0.005	5	0.5	0.5	0.25	2	Same loci	-0.00952883	-0.00925571	0.139	0.467	0.989478	0.00159105	0.295935	0.81826	0.75	6.11691e-75	0.989478	0.000331771	0.295935	0.170626	0.125	6.11691e-75	0.944989	-0.000196077	0.438646	0.0582628	0.0416667	2.36873e-48
0.001	0.005	5	0.75	0.9	0.675	2	Same loci	-2.00033	-1.85263	0.501	0.501	0.917622	-0.0782174	7.6552e-55	0.330867	0.325	7.39657e-42	0.917622	-0.0167136	7.6552e-55	0.0706998	0.0541667	7.39657e-42	0.944277	-0.0165543	6.61732e-69	0.0551582	0.0375	3.81239e-48
0.01	0.002	0.2	0.25	0.1	0.025	2	Same loci	-0.636921	-0.563169	0.001	0.011	0.999992	-5.83513e-05	0.247341	0.981535	0.975	3.81719e-190	0.999992	-5.23984e-05	0.247341	0.881401	0.8125	3.81719e-190	0.976094	-0.000845711	3.69685e-06	0.0603056	0.0625	9.45652e-62
0.01	0.002	0.2	0.5	0.5	0.25	2	Same loci	-0.494197	-0.484116	0.002	0.005	0.999984	-0.00022327	0.000197444	0.787139	0.75	7.12329e-179	0.999984	-0.000200539	0.000197444	0.707002	0.625	7.12329e-179	0.994617	-0.00198562	8.03472e-07	0.279534	0.208333	1.03384e-85
0.01	0.002	0.2	0.75	0.9	0.675	2	Same loci	2.7861	2.76364	0.001	0.001	0.999935	0.00243358	5.26879e-58	0.345133	0.325	1.20925e-156	0.999935	0.00218562	5.26879e-58	0.309967	0.270833	1.20925e-156	0.999724	0.00190761	3.81867e-42	0.22099	0.1875	1.96297e-133
0.01	0.01	1	0.25	0.1	0.025	2	Same loci	-0.427948	-0.393433	0.01	0.264	0.999853	-0.00124769	1.00469e-07	0.974796	0.975	1.27233e-143	0.999853	-0.000749321	1.00469e-07	0.58543	0.4875	1.27233e-143	0.956259	-0.000912464	1.32434e-10	0.0319069	0.0375	4.87558e-52
0.01	0.01	1	0.5	0.5	0.25	2	Same loci	-0.365857	-0.356276	0.02	0.078	0.999599	-0.00161173	1.09614e-07	0.764151	0.75	1.85396e-127	0.999599	-0.000963818	1.09614e-07	0.456963	0.375	1.85396e-127	0.99259	-0.00181612	1.95764e-11	0.148444	0.125	1.41253e-80
0.01	0.01	1	0.75	0.9	0.675	2	Same loci	-0.803413	-0.803734	0.074	0.109	0.998006	-0.00483439	7.67151e-29	0.334306	0.325	1.13344e-101	0.998006	-0.00287787	7.67151e-29	0.19901	0.1625	1.13344e-101	0.995554	-0.00317476	1.45733e-29	0.142879	0.1125	8.74103e-89
0.01	0.05	5	0.25	0.1	0.025	2	Same loci	1.19061	1.12979	0.052	0.501	0.993413	0.0261531	5.4499e-30	0.950575	0.975	1.81246e-82	0.993413	0.0056291	5.4499e-30	0.204599	0.1625	1.81246e-82	0.20549	0.00571911	9.37546e-37	0.00674116	0.0125	3.91982e-05
0.01	0.05	5	0.5	0.5	0.25	2	Same loci	1.16999	1.11413	0.079	0.344	0.990689	0.0301173	4.86601e-37	0.712888	0.75	6.61349e-77	0.990689	0.00650148	4.86601e-37	0.153893	0.125	6.61349e-77	0.916675	0.00604917	9.67528e-39	0.0433993	0.0416667	1.12967e-41
0.01	0.05	5	0.75	0.9	0.675	2	Same loci	0.0632278	0.0581912	0.346	0.37	0.945786	0.00132836	0.259072	0.272342	0.325	1.37949e-48	0.945786	0.000294052	0.259072	0.0602867	0.0541667	1.37949e-48	0.92943	0.000372636	0.217755	0.0607321	0.0375	2.3999e-44
0.001	0.0002	0.2	0.25	0.1	0.025	3	Same loci	1.99126	1.42498	0.001	0.004	0.999984	9.99063e-05	0.162706	0.98436	0.975	4.61666e-179	0.999984	9.0019e-05	0.162706	0.886942	0.8125	4.61666e-179	0.975414	-0.000613827	0.000324916	0.0572372	0.0625	2.67082e-61
0.001	0.0002	0.2	0.5	0.5	0.25	3	Same loci	-0.716171	-0.680574	0.002	0.006	0.999989	-0.000205135	5.50563e-05	0.793276	0.75	1.07511e-184	0.999989	-0.000184682	5.50563e-05	0.71418	0.625	1.07511e-184	0.993946	-0.002138	7.11226e-07	0.282128	0.208333	7.97574e-84
0.001	0.0002	0.2	0.75	0.9	0.675	3	Same loci	-0.190042	-0.1887	0.009	0.013	0.99993	-0.000159497	0.00374942	0.355689	0.325	1.65917e-155	0.99993	-0.000143752	0.00374942	0.320576	0.270833	1.65917e-155	0.999662	-0.00047926	1.70541e-08	0.229809	0.1875	3.55221e-130
0.001	0.001	1	0.25	0.1	0.025	3	Same loci	-0.89672	-0.838199	0.012	0.246	0.999785	-0.00243319	2.05278e-14	0.977914	0.975	1.7045e-137	0.999785	-0.00146608	2.05278e-14	0.589228	0.4875	1.7045e-137	0.975032	-0.00179081	7.12326e-23	0.0439075	0.0375	4.72625e-61
0.001	0.001	1	0.5	0.5	0.25	3	Same loci	0.725094	0.697133	0.015	0.061	0.999621	0.00304119	9.73012e-18	0.7733	0.75	2.31901e-128	0.999621	0.00183155	9.73012e-18	0.465719	0.375	2.31901e-128	0.992452	0.00114778	3.71735e-06	0.146918	0.125	2.7965e-80
0.001	0.001	1	0.75	0.9	0.675	3	Same loci	-0.173805	-0.168533	0.064	0.101	0.997847	-0.00119711	6.84527e-05	0.340937	0.325	1.93782e-100	0.997847	-0.000722542	6.84527e-05	0.205779	0.1625	1.93782e-100	0.996463	-0.00084962	1.68846e-07	0.137819	0.1125	1.85446e-92
0.001	0.005	5	0.25	0.1	0.025	3	Same loci	0.138215	0.123873	0.084	0.501	0.993896	0.00416437	0.0038095	0.992836	0.975	1.0858e-83	0.993896	0.000889692	0.0038095	0.212114	0.1625	1.0858e-83	0.00327259	0.000816588	0.00309231	0.000853954	0.0125	0.623531
0.001	0.005	5	0.5	0.5	0.25	3	Same loci	-1.37881	-1.23993	0.189	0.501	0.988922	-0.037662	4.665e-40	0.735625	0.75	4.10976e-74	0.988922	-0.00843661	4.665e-40	0.164786	0.125	4.10976e-74	0.817835	-0.00840387	2.64225e-35	0.0434336	0.0416667	4.42052e-29
0.001	0.005	5	0.75	0.9	0.675	3	Same loci	0.553247	0.525158	0.418	0.449	0.835707	0.0210556	5.99569e-17	0.244426	0.325	9.58543e-31	0.835707	0.00456298	5.99569e-17	0.0529698	0.0541667	9.58543e-31	0.893558	0.00428457	6.7621e-20	0.0554993	0.0375	9.83697e-38
0.01	0.002	0.2	0.25	0.1	0.025	3	Same loci	0.577014	0.518274	0.001	0.007	0.999993	0.000108964	0.0241069	0.979798	0.975	6.93074e-192	0.999993	9.78677e-05	0.0241069	0.88002	0.8125	6.93074e-192	0.977244	-0.000736054	3.63404e-05	0.0612612	0.0625	1.52466e-62
0.01	0.002	0.2	0.5	0.5	0.25	3	Same loci	0.182951	0.17968	0.002	0.005	0.999982	2.70165e-05	0.648711	0.78554	0.75	1.16609e-177	0.999982	2.42397e-05	0.648711	0.704801	0.625	1.16609e-177	0.994269	-0.00182321	9.14955e-06	0.28129	0.208333	1.04798e-84
0.01	0.002	0.2	0.75	0.9	0.675	3	Same loci	-0.00553216	-0.00552176	0.009	0.013	0.999941	-2.69851e-05	0.575015	0.349044	0.325	2.5901e-158	0.999941	-2.42171e-05	0.575015	0.31324	0.270833	2.5901e-158	0.999777	-0.000284407	1.01829e-05	0.224423	0.1875	7.03488e-137
0.01	0.01	1	0.25	0.1	0.025	3	Same loci	-0.953323	-0.887369	0.012	0.311	0.999868	-0.00229869	5.41474e-18	0.979126	0.975	2.46322e-145	0.999868	-0.00137579	5.41474e-18	0.586018	0.4875	2.46322e-145	0.967333	-0.00176374	6.95857e-28	0.0307737	0.0375	9.88472e-57
0.01	0.01	1	0.5	0.5	0.25	3	Same loci	0.548633	0.523051	0.015	0.057	0.999622	0.00243638	5.55961e-14	0.755445	0.75	2.26699e-128	0.999622	0.00146617	5.55961e-14	0.454614	0.375	2.26699e-128	0.989065	0.000511913	0.0755479	0.150795	0.125	2.53424e-74
0.01	0.01	1	0.75	0.9	0.675	3	Same loci	-1.82561	-1.79189	0.082	0.123	0.99881	-0.00993079	1.70032e-56	0.345701	0.325	5.80498e-110	0.99881	-0.00598948	1.70032e-56	0.2085	0.1625	5.80498e-110	0.99489	-0.00626863	4.96376e-47	0.143064	0.1125	1.50435e-86
0.01	0.05	5	0.25	0.1	0.025	3	Same loci	0.143405	0.132743	0.082	0.501	0.995158	0.00317082	0.0102141	0.962758	0.975	2.04679e-87	0.995158	0.000674276	0.0102141	0.204731	0.1625	2.04679e-87	0.000214923	0.000872262	0.000258216	0.000185972	0.0125	0.899974
0.01	0.05	5	0.5	0.5	0.25	3	Same loci	3.32808	3.20574	0.001	0.001	0.990693	0.0838034	5.16285e-72	0.63446	0.75	6.51821e-77	0.990693	0.0183935	5.16285e-72	0.139254	0.125	6.51821e-77	0.897458	0.0182241	4.58598e-73	0.0382739	0.0416667	2.46624e-38
0.01	0.05	5	0.75	0.9	0.675	3	Same loci	-0.998716	-0.957685	0.391	0.501	0.966429	-0.0279664	5.08925e-37	0.344563	0.325	2.7142e-56	0.966429	-0.00597487	5.08925e-37	0.0736139	0.0541667	2.7142e-56	0.925222	-0.00634271	1.42635e-34	0.0558556	0.0375	2.05033e-43
0.001	0.0002	0.2	0.25	0.1	0.025	1	Independent loci	-2.14708	-1.65882	0.021	0.1	0.911823	-0.0127765	7.17959e-07	0.423294	0.975	9.19522e-41	0.911823	-0.0115096	7.17959e-07	0.381322	0.8125	9.19522e-41	0.815211	-0.00179909	2.58437e-05	0.0469981	0.0625	7.51479e-29
0.001	0.0002	0.2	0.5	0.5	0.25	1	Independent loci	-0.429601	-0.407113	0.032	0.054	0.918212	-0.010144	6.76015e-07	0.34921	0.75	5.66795e-42	0.918212	-0.00912161	6.76015e-07	0.314013	0.625	5.66795e-42	0.855735	-0.00824075	1.67998e-05	0.243329	0.208333	7.72073e-33
0.001	0.0002	0.2	0.75	0.9	0.675	1	Independent loci	0.341516	0.337288	0.033	0.039	0.965847	-0.00320266	6.028e-06	0.195009	0.325	5.12661e-56	0.965847	-0.00287923	6.028e-06	0.175316	0.270833	5.12661e-56	0.932633	-0.00577484	6.13641e-06	0.246258	0.1875	4.29576e-45
0.001	0.001	1	0.25	0.1	0.025	1	Independent loci	-0.426852	-0.408294	0.051	0.455	0.954384	-0.0117459	9.65273e-08	0.507304	0.975	2.30699e-51	0.954384	-0.00703625	9.65273e-08	0.303896	0.4875	2.30699e-51	0.854985	-0.00133748	5.29958e-09	0.0274474	0.0375	9.35808e-33
0.001	0.001	1	0.5	0.5	0.25	1	Independent loci	0.553278	0.536948	0.045	0.111	0.976919	-0.00438116	0.00106561	0.467066	0.75	2.5775e-62	0.976919	-0.00261575	0.00106561	0.278859	0.375	2.5775e-62	0.946942	-0.00215413	0.00438849	0.172856	0.125	6.21243e-49
0.001	0.001	1	0.75	0.9	0.675	1	Independent loci	0.457963	0.455496	0.075	0.117	0.992513	0.00117248	0.00907814	0.281243	0.325	2.0743e-80	0.992513	0.00071296	0.00907814	0.171018	0.1625	2.0743e-80	0.978315	-0.000949781	0.053933	0.181841	0.1125	2.55896e-63
0.001	0.005	5	0.25	0.1	0.025	1	Independent loci	1.27335	1.15677	0.085	0.501	0.991569	0.0286915	6.99245e-36	0.743629	0.975	1.67932e-78	0.991569	0.00663391	6.99245e-36	0.171938	0.1625	1.67932e-78	0.0861489	0.00729096	4.3888e-31	0.0063609	0.0125	0.010073
0.001	0.005	5	0.5	0.5	0.25	1	Independent loci	0.748067	0.694704	0.13	0.501	0.988623	0.0211628	8.93974e-28	0.635203	0.75	1.09962e-73	0.988623	0.00487364	8.93974e-28	0.146283	0.125	1.09962e-73	0.825883	0.00483708	2.78052e-23	0.0406279	0.0416667	8.26647e-30
0.001	0.005	5	0.75	0.9	0.675	1	Independent loci	-0.995789	-0.932829	0.437	0.501	0.922208	-0.0365308	1.37671e-30	0.364042	0.325	8.86145e-43	0.922208	-0.00737687	1.37671e-30	0.0735132	0.0541667	8.86145e-43	0.900154	-0.00815409	8.59277e-33	0.0653486	0.0375	9.18967e-39
0.01	0.002	0.2	0.25	0.1	0.025	1	Independent loci	0.28589	0.265483	0.011	0.041	0.917017	-0.0124111	8.34609e-07	0.428044	0.975	9.70041e-42	0.917017	-0.0111512	8.34609e-07	0.384591	0.8125	9.70041e-42	0.823573	-0.00187455	0.00012702	0.0558945	0.0625	1.34792e-29
0.01	0.002	0.2	0.5	0.5	0.25	1	Independent loci	0.198056	0.195112	0.016	0.029	0.931481	-0.00940725	9.90746e-07	0.362757	0.75	8.05155e-45	0.931481	-0.00845743	9.90746e-07	0.326131	0.625	8.05155e-45	0.87465	-0.0078339	1.99532e-05	0.253425	0.208333	4.21437e-35
0.01	0.002	0.2	0.75	0.9	0.675	1	Independent loci	-0.298236	-0.295998	0.027	0.041	0.977355	-0.00335985	1.39105e-07	0.211599	0.325	1.27327e-62	0.977355	-0.00301835	1.39105e-07	0.190092	0.270833	1.27327e-62	0.94119	-0.00589778	6.37963e-07	0.241768	0.1875	2.80694e-47
0.01	0.01	1	0.25	0.1	0.025	1	Independent loci	0.924148	0.828798	0.03	0.288	0.958965	-0.00787331	9.94098e-05	0.516352	0.975	4.587e-53	0.958965	-0.00469403	9.94098e-05	0.307846	0.4875	4.587e-53	0.901292	0.000390525	0.107471	0.0404305	0.0375	6.00894e-39
0.01	0.01	1	0.5	0.5	0.25	1	Independent loci	-0.00907886	-0.008937	0.047	0.114	0.981375	-0.0063449	7.72077e-07	0.476107	0.75	9.19539e-66	0.981375	-0.00378487	7.72077e-07	0.284008	0.375	9.19539e-66	0.943607	-0.00370066	7.72173e-06	0.175662	0.125	5.93398e-48
0.01	0.01	1	0.75	0.9	0.675	1	Independent loci	1.78002	1.7448	0.034	0.053	0.994915	0.00837828	5.51868e-37	0.269451	0.325	1.2546e-86	0.994915	0.00505735	5.51868e-37	0.162648	0.1625	1.2546e-86	0.980085	0.00387507	3.67402e-13	0.172106	0.1125	1.09637e-64
0.01	0.05	5	0.25	0.1	0.025	1	Independent loci	-1.4875	-1.37671	0.15	0.501	0.99188	-0.0365564	1.27513e-39	0.84788	0.975	4.17353e-79	0.99188	-0.00753316	1.27513e-39	0.174722	0.1625	4.17353e-79	0.423655	-0.00725422	1.57192e-43	0.0114304	0.0125	1.95049e-10
0.01	0.05	5	0.5	0.5	0.25	1	Independent loci	-0.488041	-0.455666	0.166	0.501	0.991965	-0.0139717	1.60626e-20	0.674736	0.75	2.82803e-79	0.991965	-0.00298916	1.60626e-20	0.144356	0.125	2.82803e-79	0.873221	-0.00284229	1.05093e-17	0.0369815	0.0416667	6.41565e-35
0.01	0.05	5	0.75	0.9	0.675	1	Independent loci	0.249078	0.238888	0.262	0.413	0.962064	0.00918939	3.046e-10	0.355257	0.325	2.50526e-54	0.962064	0.00196708	3.046e-10	0.0760461	0.0541667	2.50526e-54	0.93579	0.00126458	4.36181e-05	0.0620215	0.0375	7.26411e-46
0.001	0.0002	0.2	0.25	0.1	0.025	2	Independent loci	1.54397	1.19341	0.013	0.056	0.912648	-0.01248	1.06507e-06	0.423339	0.975	6.48868e-41	0.912648	-0.0112352	1.06507e-06	0.381112	0.8125	6.48868e-41	0.807478	-0.00166938	0.000245233	0.0495197	0.0625	3.44106e-28
0.001	0.0002	0.2	0.5	0.5	0.25	2	Independent loci	1.55099	1.51423	0.019	0.032	0.918466	-0.00949657	2.52063e-06	0.348828	0.75	5.0502e-42	0.918466	-0.0085484	2.52063e-06	0.313999	0.625	5.0502e-42	0.855597	-0.00754094	6.00945e-05	0.240742	0.208333	7.99965e-33
0.001	0.0002	0.2	0.75	0.9	0.675	2	Independent loci	-1.08827	-1.07564	0.045	0.055	0.964752	-0.00461043	1.56572e-09	0.195396	0.325	1.6494e-55	0.964752	-0.00414788	1.56572e-09	0.175793	0.270833	1.6494e-55	0.93026	-0.00693881	1.10596e-07	0.240636	0.1875	1.54876e-44
0.001	0.001	1	0.25	0.1	0.025	2	Independent loci	-2.58331	-2.34074	0.075	0.501	0.953747	-0.0175382	6.00953e-13	0.510757	0.975	3.85418e-51	0.953747	-0.0105768	6.00953e-13	0.308024	0.4875	3.85418e-51	0.839912	-0.00498246	1.45876e-33	0.0296247	0.0375	3.66425e-31
0.001	0.001	1	0.5	0.5	0.25	2	Independent loci	1.39381	1.32463	0.031	0.074	0.977653	-0.000543231	0.659403	0.453293	0.75	7.78758e-63	0.977653	-0.000327862	0.659403	0.273581	0.375	7.78758e-63	0.936865	-6.15581e-05	0.940022	0.175346	0.125	3.88651e-46
0.001	0.001	1	0.75	0.9	0.675	2	Independent loci	1.11822	1.11525	0.059	0.076	0.992964	0.00510421	1.87329e-20	0.264328	0.325	2.08552e-81	0.992964	0.00308175	1.87329e-20	0.159592	0.1625	2.08552e-81	0.983772	0.00165723	0.000518997	0.19844	0.1125	5.6137e-68
0.001	0.005	5	0.25	0.1	0.025	2	Independent loci	-1.40535	-1.2724	0.184	0.501	0.987437	-0.0422217	1.00573e-38	0.810138	0.975	4.31769e-72	0.987437	-0.00917171	1.00573e-38	0.175984	0.1625	4.31769e-72	0.200851	-0.00788681	3.48355e-35	-0.00968545	0.0125	4.912e-05
0.001	0.005	5	0.5	0.5	0.25	2	Independent loci	-0.00952883	-0.00925571	0.147	0.5	0.98892	-0.000166363	0.906122	0.741477	0.75	4.12742e-74	0.98892	-3.46905e-05	0.906122	0.154615	0.125	4.12742e-74	0.906089	-0.000590824	0.0929502	0.0601952	0.0416667	9.48873e-40
0.001	0.005	5	0.75	0.9	0.675	2	Independent loci	-2.00033	-1.85263	0.501	0.501	0.926813	-0.0768169	4.70514e-55	0.344109	0.325	9.24633e-44	0.926813	-0.0164143	4.70514e-55	0.0735293	0.0541667	9.24633e-44	0.90.000255	-0.0172637	1.2991e-52	0.0797577	0.0375	2.49277e-42
0.01	0.002	0.2	0.25	0.1	0.025	2	Independent loci	-0.636921	-0.563169	0.015	0.058	0.917131	-0.0125357	7.19877e-07	0.429711	0.975	9.21763e-42	0.917131	-0.0112569	7.19877e-07	0.385873	0.8125	9.21763e-42	0.819771	-0.00189782	9.26801e-05	0.0546466	0.0625	2.97328e-29
0.01	0.002	0.2	0.5	0.5	0.25	2	Independent loci	-0.494197	-0.484116	0.019	0.033	0.932085	-0.00968097	5.35437e-07	0.364581	0.75	5.80085e-45	0.932085	-0.00869537	5.35437e-07	0.327464	0.625	5.80085e-45	0.874743	-0.00800954	1.30566e-05	0.252919	0.208333	4.0994e-35
0.01	0.002	0.2	0.75	0.9	0.675	2	Independent loci	2.7861	2.76364	0.003	0.004	0.976787	-0.000691851	0.233563	0.208607	0.325	3.18234e-62	0.976787	-0.000621357	0.233563	0.187352	0.270833	3.18234e-62	0.940662	-0.00341406	0.00217524	0.238906	0.1875	3.90892e-47
0.01	0.01	1	0.25	0.1	0.025	2	Independent loci	-0.427948	-0.393433	0.044	0.37	0.957758	-0.0113055	1.14276e-07	0.511855	0.975	1.34179e-52	0.957758	-0.00678974	1.14276e-07	0.307403	0.4875	1.34179e-52	0.892236	-0.0015117	2.40419e-09	0.0357579	0.0375	1.55399e-37
0.01	0.01	1	0.5	0.5	0.25	2	Independent loci	-0.365857	-0.356276	0.051	0.125	0.980558	-0.00794882	6.79929e-09	0.481384	0.75	4.5027e-65	0.980558	-0.0047534	6.79929e-09	0.287868	0.375	4.5027e-65	0.946365	-0.00462412	4.40906e-08	0.17772	0.125	9.26942e-49
0.01	0.01	1	0.75	0.9	0.675	2	Independent loci	-0.803413	-0.803734	0.094	0.139	0.997261	-0.00588533	3.85883e-34	0.285515	0.325	1.44038e-96	0.997261	-0.00350349	3.85883e-34	0.169965	0.1625	1.44038e-96	0.976104	-0.00560074	1.47519e-17	0.178748	0.1125	9.31764e-62
0.01	0.05	5	0.25	0.1	0.025	2	Independent loci	1.19061	1.12979	0.078	0.501	0.985071	0.0208516	3.66942e-20	0.748156	0.975	2.56146e-69	0.985071	0.00448803	3.66942e-20	0.161031	0.1625	2.56146e-69	0.177771	0.00556227	2.01114e-27	0.0084421	0.0125	0.000148704
0.01	0.05	5	0.5	0.5	0.25	2	Independent loci	1.16999	1.11413	0.098	0.413	0.990885	0.0271653	1.95133e-38	0.619146	0.75	3.0088e-77	0.990885	0.00586423	1.95133e-38	0.133656	0.125	3.0088e-77	0.900354	0.00570123	7.14839e-34	0.0439928	0.0416667	8.53054e-39
0.01	0.05	5	0.75	0.9	0.675	2	Independent loci	0.0632278	0.0581912	0.311	0.382	0.958838	0.00181145	0.107635	0.29968	0.325	5.14385e-53	0.958838	0.00040099	0.107635	0.0663384	0.0541667	5.14385e-53	0.923413	-0.000220305	0.526478	0.0671052	0.0375	4.96978e-43
0.001	0.0002	0.2	0.25	0.1	0.025	3	Independent loci	1.99126	1.42498	0.01	0.049	0.912677	-0.012541	1.01894e-06	0.424594	0.975	6.4102e-41	0.912677	-0.0112999	1.01894e-06	0.382574	0.8125	6.4102e-41	0.806572	-0.00160897	0.000302376	0.0483657	0.0625	4.09625e-28
0.001	0.0002	0.2	0.5	0.5	0.25	3	Independent loci	-0.716171	-0.680574	0.033	0.055	0.918231	-0.0102491	5.44485e-07	0.349404	0.75	5.61873e-42	0.918231	-0.00922718	5.44485e-07	0.314566	0.625	5.61873e-42	0.854697	-0.00816542	1.56165e-05	0.23908	0.208333	1.00724e-32
0.001	0.0002	0.2	0.75	0.9	0.675	3	Independent loci	-0.190042	-0.1887	0.036	0.044	0.966291	-0.00374692	1.9544e-07	0.195098	0.325	3.16077e-56	0.966291	-0.00337704	1.9544e-07	0.175838	0.270833	3.16077e-56	0.9322	-0.00612536	1.37726e-06	0.241298	0.1875	5.44762e-45
0.001	0.001	1	0.25	0.1	0.025	3	Independent loci	-0.89672	-0.838199	0.054	0.353	0.956269	-0.012774	6.53935e-09	0.508672	0.975	4.83444e-52	0.956269	-0.00769679	6.53935e-09	0.306493	0.4875	4.83444e-52	0.890039	-0.00238758	8.8749e-15	0.0391894	0.0375	3.28299e-37
0.001	0.001	1	0.5	0.5	0.25	3	Independent loci	0.725094	0.697133	0.042	0.114	0.974361	-0.00374127	0.00802609	0.47255	0.75	1.26047e-60	0.974361	-0.00225318	0.00802609	0.284593	0.375	1.26047e-60	0.945265	-0.00148446	0.0371281	0.162245	0.125	1.96645e-48
0.001	0.001	1	0.75	0.9	0.675	3	Independent loci	-0.173805	-0.168533	0.092	0.132	0.993837	-0.00279661	3.50066e-10	0.273832	0.325	1.55103e-83	0.993837	-0.00168795	3.50066e-10	0.165277	0.1625	1.55103e-83	0.980346	-0.00335081	1.5874e-10	0.177984	0.1125	6.72416e-65
0.001	0.005	5	0.25	0.1	0.025	3	Independent loci	0.138215	0.123873	0.129	0.501	0.982534	-0.00472653	0.0145885	0.791245	0.975	8.5228e-67	0.982534	-0.00100979	0.0145885	0.169045	0.1625	8.5228e-67	0.355669	0.000883964	0.00227182	0.0115951	0.0125	1.31089e-08
0.001	0.005	5	0.5	0.5	0.25	3	Independent loci	-1.37881	-1.23993	0.213	0.501	0.992103	-0.0379507	1.3069e-48	0.660394	0.75	1.49448e-79	0.992103	-0.00850126	1.3069e-48	0.147934	0.125	1.49448e-79	0.907522	-0.00834791	1.5886e-39	0.0550581	0.0416667	5.3667e-40
0.001	0.005	5	0.75	0.9	0.675	3	Independent loci	0.553247	0.525158	0.324	0.438	0.920718	0.020935	1.64658e-21	0.296804	0.325	1.78951e-42	0.920718	0.00453686	1.64658e-21	0.0643208	0.0541667	1.78951e-42	0.930475	0.00362149	5.22934e-18	0.0647207	0.0375	1.38138e-44
0.01	0.002	0.2	0.25	0.1	0.025	3	Independent loci	0.577014	0.518274	0.011	0.043	0.916165	-0.0124485	9.48787e-07	0.429515	0.975	1.41633e-41	0.916165	-0.0111808	9.48787e-07	0.385775	0.8125	1.41633e-41	0.822572	-0.00181422	0.000163045	0.054885	0.0625	1.66277e-29
0.01	0.002	0.2	0.5	0.5	0.25	3	Independent loci	0.182951	0.17968	0.017	0.029	0.9323	-0.00942878	8.66067e-07	0.36364	0.75	5.15872e-45	0.9323	-0.00845968	8.66067e-07	0.326264	0.625	5.15872e-45	0.877322	-0.00779335	1.84209e-05	0.254036	0.208333	1.89583e-35
0.01	0.002	0.2	0.75	0.9	0.675	3	Independent loci	-0.00553216	-0.00552176	0.025	0.037	0.977996	-0.00308096	7.62084e-07	0.212204	0.325	4.3969e-63	0.977996	-0.00276493	7.62084e-07	0.190437	0.270833	4.3969e-63	0.940499	-0.00559988	1.76634e-06	0.2394	0.1875	4.32641e-47
0.01	0.01	1	0.25	0.1	0.025	3	Independent loci	-0.953323	-0.887369	0.052	0.419	0.957248	-0.012775	6.08678e-09	0.513437	0.975	2.09135e-52	0.957248	-0.00764596	6.08678e-09	0.307298	0.4875	2.09135e-52	0.868699	-0.00225165	1.20924e-16	0.0302729	0.0375	2.35247e-34
0.01	0.01	1	0.5	0.5	0.25	3	Independent loci	0.548633	0.523051	0.038	0.1	0.97957	-0.0040.000221	0.00100294	0.473906	0.75	2.81798e-64	0.97957	-0.0025275	0.00100294	0.285189	0.375	2.81798e-64	0.941757	-0.00243127	0.00244568	0.173951	0.125	1.96183e-47
0.01	0.01	1	0.75	0.9	0.675	3	Independent loci	-1.82561	-1.79189	0.107	0.159	0.995867	-0.0109974	4.68837e-46	0.288373	0.325	5.86554e-90	0.995867	-0.00663275	4.68837e-46	0.173924	0.1625	5.86554e-90	0.975018	-0.00854971	1.63782e-27	0.17374	0.1125	4.82689e-61
0.01	0.05	5	0.25	0.1	0.025	3	Independent loci	0.143405	0.132743	0.121	0.501	0.990923	-0.000976327	0.44657	0.744186	0.975	2.58566e-77	0.990923	-0.000207616	0.44657	0.158251	0.1625	2.58566e-77	0.000372442	0.000392197	0.0888696	-0.000245131	0.0125	0.868574
0.01	0.05	5	0.5	0.5	0.25	3	Independent loci	3.32808	3.20574	0.001	0.001	0.991358	0.0815517	2.7875e-74	0.596802	0.75	4.18437e-78	0.991358	0.0178993	2.7875e-74	0.130988	0.125	4.18437e-78	0.943818	0.0181556	2.67139e-75	0.0492409	0.0416667	5.16705e-48
0.01	0.05	5	0.75	0.9	0.675	3	Independent loci	-0.998716	-0.957685	0.354	0.46	0.981037	-0.0289744	7.90997e-45	0.366723	0.325	1.7875e-65	0.981037	-0.0061902	7.90997e-45	0.0783482	0.0541667	1.7875e-65	0.95909	-0.00670086	2.42079e-38	0.0711525	0.0375	4.09752e-53
0.01	0.05	5	0.5	0.5	0.25	4	Same loci	-1.4208	-1.34919	0.185	0.501	0.990571	-0.0377076	3.08662e-43	0.717319	0.75	1.05599e-76	0.990571	-0.00816942	3.08662e-43	0.155408	0.125	1.05599e-76	0.929301	-0.00866537	2.1268e-49	0.0475296	0.0416667	2.56864e-44
0.01	0.05	5	0.5	0.5	0.25	4	Independent loci	-1.4208	-1.34919	0.207	0.501	0.989604	-0.0409944	3.49141e-46	0.672771	0.75	3.91218e-75	0.989604	-0.00888151	3.49141e-46	0.145757	0.125	3.91218e-75	0.914749	-0.00917945	5.79019e-44	0.0544634	0.0416667	2.63352e-41
